# Supplementary material for: A Horizon Decomposition Approach for the Capacitated Lot-Sizing Problem with Setup Times
Source: Atypon-hosted journal article supplement (doi:10.1287/ijoc.2016.0691), 2016-05-24
Supplement: ijoc.2016.0691-sm.pdf [file ijoc.2016.0691-sm.pdf]

# Online Supplement to “A Horizon Decomposition approach for the Capacitated Lot Sizing Problem with Setup Times”

Fragkos Ioannis

Rotterdam School of Management, Erasmus University Rotterdam, 3062 PA Rotterdam, Netherlands, fragkos@rsm.nl,

Zeger Degraeve

Melbourne Business School, University of Melbourne, z.degraeve@mbs.edu,

Bert De Reyck

UCL School of Management, University College London, London WC1E 6BT, United Kingdom, b.dereyck@ucl.ac.uk

This online supplement consists of two parts. Part A reports summary computational results, and part B reports detailed computational results, as described in section 6 of the main paper. All instances used in the paper can be found online at <https://www.dropbox.com/sh/qrlkspnlfmty4fb/AACJuf7uC4v-LAMNyXG9mqvia> and as a supplemental material at the publishers site.

*Key words:* Algorithms; lot-sizing; Branch-and-Price

*History:* Submitted August 2014; Revised August 2015; Accepted December 2015

## A. Summary Results of Section 6.

Table A.1 shows the Item-Period combinations that give the best average gap and CPU time.

**Table A.1 Configurations ( $|H|, |L|$ ) that give the best average gap and CPU time for each item-period combination.**

| $ I $ | $ T =15$ |     |        | $ T =30$ |     |       | $ T =60$ |     |       |
|-------|----------|-----|--------|----------|-----|-------|----------|-----|-------|
|       | Gap      | CPU | Time   | Gap      | CPU | Time  | Gap      | CPU | Time  |
| 2     | (9,3)    |     | (11,0) | (11,1)   |     | (3,0) | (11,3)   |     | (7,0) |
| 6     | (9,3)    |     | (3,0)  | (11,3)   |     | (3,0) | (11,3)   |     | (3,0) |
| 10    | (11,3)   |     | (3,0)  | (11,1)   |     | (3,0) | (7,2)    |     | (3,0) |

Table A.2 compares the lower bound obtained by horizon (HD), item (DJ) (Degraeve and Jans 2007) and period decompositions (PD) (Jans and Degraeve 2004, de Araujo et

al. 2015) and the approximate extended formulation (AEF) approach of Van Vyve and Wolsey (2006).

**Table A.2 Lower bounds for horizon (HD), period (PD), item (DJ) decomposition and approximate extended formulations (AEF). Bold number indicate the best result for each instance.**

| Instance    | $( H ,  L )$ | Lower Bounds   |         |         |                | Optimal Solution |
|-------------|--------------|----------------|---------|---------|----------------|------------------|
|             |              | HD             | DJ      | PD      | AEF            |                  |
| G30 (6-15)  | (8,1)        | <b>37,809</b>  | 37,103  | 37,431  | –              | 37,809           |
| G30b (6-15) | (8,1)        | <b>37,579</b>  | 37,201  | 37,382  | 37,469         | 37,721           |
| G53 (12-15) | (8,1)        | <b>74,433</b>  | 73,848  | 73,945  | 74,230         | 74,634           |
| G57 (24-15) | (8,0)        | 134,184        | 136,366 | 136,418 | <b>136,417</b> | 136,509          |
| G62 (6-30)  | (15,1)       | <b>61,692</b>  | 60,946  | 61,204  | 61,294         | 61,746           |
| G69 (12-30) | (15,1)       | <b>130,398</b> | 130,177 | 130,338 | 130,335        | 130,596          |
| G72 (24-30) | (15,0)       | 284,554        | 287,753 | 287,824 | <b>287,828</b> | 287,929          |

Time limit for horizon decomposition: 3,600 seconds.

Table A.3 shows the CPU time and integrality gap for the horizon decomposition (HD), the neighborhood search heuristic of Müller et al. (2012) (ALNS) and the Lagrange-relaxation based heuristic of Süral et al. (2009) (SDW). The integrality gap is measured using the best upper bound found by all approaches, and therefore constitutes a measure of the lower bound quality.

Table A.4 reports the average integrality gap calculated by taking into account the best upper bound found by both approaches when the time limit for horizon decomposition is 300 (HD300) and 600 (HD600) seconds respectively.

Table A.5 shows the integrality gaps obtained by ALNS and horizon decomposition after 300 (HD300) and 600 (HD600) seconds respectively. The integrality gap reported for each method is calculated using the best upper and lower bound which that method returned, and is used as a measure of overall performance. In order to indicate clearly the upper bound quality, table A.6 reports the integrality gap calculated when the best lower bound is used, thereby providing a measure that assesses the upper bound quality directly.

Table A.7 compares the results of product decomposition (Pimentel et al. 2010) with a horizon decomposition implementation that uses zero overlap and 10-period subproblems.

**Table A.3 CPU times (s) and integrality gaps (%) for the Horizon Decomposition (HD), the neighborhood search of Müller et al. (2012) (ALNS) and the Lagrange relaxation of Süral et al. (2009) (SDW).**

| $ I  \times  T $ | # Instances | $( H ,  L )$ | CPU Time (s) |             |             | Gap-LB (%)  |             |      |
|------------------|-------------|--------------|--------------|-------------|-------------|-------------|-------------|------|
|                  |             |              | HD           | ALNS        | SDW         | HD          | ALNS        | SDW  |
| 12 x 10 het      | 10          | (5,0)        | 17.5         | 71.9        | <b>3.1</b>  | <b>1.7</b>  | 71.4        | 28.7 |
| 24 x 10 het      | 10          | (5,0)        | 88.3         | 5.3         | <b>4.8</b>  | <b>1.9</b>  | 4.9         | 16.2 |
| 12 x 15 het      | 10          | (10,0)       | 83.3         | 12.6        | <b>6.1</b>  | <b>4.2</b>  | 12.4        | 23.2 |
| 24 x 15 het      | 10          | (10,0)       | 142.6        | <b>9.5</b>  | 15.3        | <b>6.5</b>  | 9.5         | 18.3 |
| 12 x 30 het      | 5           | (15,0)       | 151.8        | <b>17.7</b> | 24.0        | <b>15.3</b> | 17.7        | 19.9 |
| 24 x 30 het      | 5           | (15,0)       | 153.3        | <b>20.5</b> | 38.9        | <b>20.2</b> | 20.5        | 29.6 |
| 12 x 10 hom      | 10          | (5,0)        | 72.3         | 6.8         | <b>2.7</b>  | <b>2.5</b>  | 20.2        | 41.7 |
| 24 x 10 hom      | 10          | (5,0)        | 144.8        | 34.7        | <b>4.5</b>  | <b>6.5</b>  | 11.1        | 20.2 |
| 12 x 15 hom      | 10          | (10,0)       | 141.0        | 28.7        | <b>5.6</b>  | <b>6.6</b>  | 19.1        | 27.0 |
| 24 x 15 hom      | 10          | (10,0)       | 150.9        | 84.2        | <b>11.1</b> | <b>8.8</b>  | 11.9        | 19.8 |
| 12 x 30 hom      | 5           | (15,0)       | 151.8        | 153.6       | <b>19.1</b> | <b>18.6</b> | 20.3        | 22.8 |
| 24 x 30 hom      | 5           | (15,0)       | 151.1        | 182.0       | <b>22.9</b> | 24.1        | <b>22.5</b> | 30.0 |
| Average          |             |              | 114.5        | 37.6        | <b>10.6</b> | <b>7.8</b>  | 15.00       | 24.6 |

Time limit for HD is 150s. Time and gap for ALNS are based on an average of 10 runs. HD uses 0 overlap and 5, 10 and 15 length for 10, 15 and 30 period problems respectively. Gap is calculated using the best found upper bound, and therefore constitutes a measure of lower bound quality. HD is run on a machine that is approximately 25% faster than SDW and 6% slower than ALNS.

Pimentel et al. (2010) run their algorithms with a 3,600 CPU time limit, and used a Pentium IV to perform their experiments. According to SPEC ([www.spec.org](http://www.spec.org)) our machine is about 70% faster, and we therefore pose a time limit of 1,000 seconds, to ensure that our results are comparable.

Table A.8 reports the relative performance of CPLEX and Horizon Decomposition at the aforementioned problems.

**Table A.4** Comparison of Lower Bounds obtained by Horizon Decomposition and ALNS (Müller et al. 2012).

|             |       |       | Average LB integrality gap (%) |       |              |               |       |              |       |       |              |
|-------------|-------|-------|--------------------------------|-------|--------------|---------------|-------|--------------|-------|-------|--------------|
|             |       |       | Homogeneous                    |       |              | Heterogeneous |       |              | Total |       |              |
| $k$         | $ I $ | $ T $ | ALNS                           | HD300 | HD600        | ALNS          | HD300 | HD600        | ALNS  | HD300 | HD600        |
| 5           | 12    | 30    | 21.22                          | 9.59  | <b>6.22</b>  | 8.61          | 1.87  | <b>0.58</b>  | 14.92 | 5.73  | <b>3.40</b>  |
| 4           | 24    | 30    | 6.19                           | 6.72  | <b>5.53</b>  | <b>4.69</b>   | 6.66  | 5.21         | 5.44  | 6.69  | <b>5.37</b>  |
| 5           | 12    | 45    | 22.74                          | 9.95  | <b>9.07</b>  | 8.96          | 4.36  | <b>3.64</b>  | 15.85 | 7.16  | <b>6.35</b>  |
| 5           | 24    | 45    | 6.93                           | 6.12  | <b>5.95</b>  | 5.29          | 5.29  | <b>4.26</b>  | 6.11  | 5.70  | <b>5.10</b>  |
| 5           | 12    | 60    | 22.33                          | 17.32 | <b>16.21</b> | 15.84         | 12.65 | <b>11.88</b> | 19.08 | 14.99 | <b>14.04</b> |
| 5           | 24    | 60    | 25.30                          | 22.50 | <b>20.14</b> | <b>16.79</b>  | 20.50 | 20.07        | 21.04 | 21.50 | <b>20.11</b> |
| 5           | 12    | 90    | 23.96                          | 19.72 | <b>18.94</b> | 16.51         | 15.24 | <b>12.75</b> | 20.23 | 17.48 | <b>15.84</b> |
| 5           | 24    | 90    | 27.32                          | 25.86 | <b>24.70</b> | <b>18.18</b>  | 22.72 | 20.30        | 22.75 | 24.29 | <b>22.50</b> |
| Average (%) |       |       | 20.18                          | 15.16 | <b>13.75</b> | 12.22         | 11.44 | <b>10.11</b> | 16.20 | 13.30 | <b>11.93</b> |

$k$  denotes the number of instances HD is run on a machine that is approximately 70% faster than SDW and 30% faster than ALNS.

**Table A.5** Comparison of Horizon Decomposition and ALNS (Müller et al. 2012).

|             |       |       | Average integrality gap (%) |       |              |               |       |              |       |       |              |
|-------------|-------|-------|-----------------------------|-------|--------------|---------------|-------|--------------|-------|-------|--------------|
|             |       |       | Homogeneous                 |       |              | Heterogeneous |       |              | Total |       |              |
| $k$         | $ I $ | $ T $ | ALNS                        | HD300 | HD600        | ALNS          | HD300 | HD600        | ALNS  | HD300 | HD600        |
| 5           | 12    | 30    | 21.53                       | 11.01 | <b>7.49</b>  | 10.01         | 1.91  | <b>0.59</b>  | 15.77 | 6.46  | <b>4.04</b>  |
| 5           | 24    | 30    | 6.56                        | 7.50  | <b>6.23</b>  | 5.46          | 7.70  | <b>5.62</b>  | 6.01  | 7.60  | <b>5.93</b>  |
| 5           | 12    | 45    | 23.01                       | 12.18 | <b>10.45</b> | 10.87         | 5.32  | <b>4.29</b>  | 16.94 | 8.75  | <b>7.37</b>  |
| 5           | 24    | 45    | 7.42                        | 6.67  | <b>6.44</b>  | 6.47          | 7.07  | <b>4.86</b>  | 6.95  | 6.87  | <b>5.65</b>  |
| 5           | 12    | 60    | 23.20                       | 20.15 | <b>18.16</b> | 20.78         | 13.79 | <b>12.64</b> | 21.99 | 16.97 | <b>15.40</b> |
| 5           | 24    | 60    | 26.63                       | 29.60 | <b>24.67</b> | <b>22.26</b>  | 24.35 | 22.87        | 24.44 | 26.97 | <b>23.77</b> |
| 5           | 12    | 90    | 25.67                       | 20.96 | <b>19.87</b> | 22.57         | 17.27 | <b>13.15</b> | 24.12 | 19.12 | <b>16.51</b> |
| 5           | 24    | 90    | 29.21                       | 31.81 | <b>29.02</b> | 25.99         | 25.56 | <b>20.39</b> | 27.60 | 28.69 | <b>24.70</b> |
| Average (%) |       |       | 21.11                       | 18.03 | <b>15.76</b> | 16.05         | 13.16 | <b>10.83</b> | 18.58 | 15.60 | <b>13.30</b> |

$k$  denotes the number of instances. HD is run on a machine that is approximately 70% faster than SDW and 30% faster than ALNS.

**Table A.6 Comparison of Upper Bounds obtained by Horizon Decomposition and ALNS (Müller et al. 2012).**

|             |       |       | Average UB integrality gap (%) |       |              |               |       |              |              |       |              |
|-------------|-------|-------|--------------------------------|-------|--------------|---------------|-------|--------------|--------------|-------|--------------|
|             |       |       | Homogeneous                    |       |              | Heterogeneous |       |              | Total        |       |              |
| $k$         | $ I $ | $ T $ | ALNS                           | HD300 | HD600        | ALNS          | HD300 | HD600        | ALNS         | HD300 | HD600        |
| 5           | 12    | 30    | 6.51                           | 7.62  | <b>6.22</b>  | 0.75          | 0.61  | <b>0.59</b>  | 3.63         | 4.12  | <b>3.41</b>  |
| 5           | 24    | 30    | 5.88                           | 6.29  | <b>5.53</b>  | 4.58          | 5.10  | <b>4.49</b>  | 5.23         | 5.70  | <b>5.01</b>  |
| 5           | 12    | 45    | 9.31                           | 11.28 | <b>9.07</b>  | 4.24          | 4.58  | <b>4.29</b>  | 6.78         | 7.93  | <b>6.68</b>  |
| 5           | 24    | 45    | 6.44                           | 6.50  | <b>5.95</b>  | 5.09          | 6.02  | <b>4.86</b>  | 5.76         | 6.26  | <b>5.40</b>  |
| 5           | 12    | 60    | 17.03                          | 19.01 | <b>16.21</b> | 13.37         | 13.01 | <b>12.64</b> | 15.20        | 16.01 | <b>14.43</b> |
| 5           | 24    | 60    | 21.42                          | 26.94 | <b>20.14</b> | <b>20.54</b>  | 23.90 | 22.85        | <b>20.98</b> | 25.42 | 21.50        |
| 5           | 12    | 90    | 20.60                          | 20.17 | <b>18.94</b> | 15.02         | 14.72 | <b>13.15</b> | 17.81        | 17.45 | <b>16.04</b> |
| 5           | 24    | 90    | 26.54                          | 30.56 | <b>24.70</b> | 22.07         | 23.05 | <b>20.39</b> | 24.31        | 26.80 | <b>22.54</b> |
| Average (%) |       |       | 14.64                          | 16.55 | <b>13.75</b> | 11.01         | 11.68 | <b>10.71</b> | 12.83        | 14.12 | <b>12.23</b> |

$k$  denotes the number of instances. HD is run on a machine that is approximately 70% faster than SDW and 30% faster than ALNS.

Table A.7 Comparison of Product Decomposition (PD) and Horizon Decomposition (HD).

| Group          | PD Gap (%)  | HD Gap (%)  | Group  | PD Gap (%)  | HD Gap (%)  |
|----------------|-------------|-------------|--------|-------------|-------------|
| x11117         | <b>0.00</b> | <b>0.00</b> | x12117 | 0.05        | <b>0.00</b> |
| x11118         | 0.03        | <b>0.00</b> | x12118 | 0.20        | <b>0.00</b> |
| x11119         | 1.54        | <b>0.71</b> | x12119 | 1.73        | <b>1.14</b> |
| x11127         | <b>0.00</b> | <b>0.00</b> | x12127 | 0.02        | <b>0.00</b> |
| x11128         | 0.1         | <b>0.00</b> | x12128 | 0.29        | <b>0.02</b> |
| x11129         | 2.53        | <b>0.57</b> | x12129 | 1.14        | <b>0.04</b> |
| x11217         | 0.08        | <b>0.05</b> | x12217 | <b>0.17</b> | 0.24        |
| x11218         | 0.41        | <b>0.10</b> | x12218 | 0.63        | <b>0.26</b> |
| x11219         | 2.38        | <b>1.46</b> | x12219 | 2.75        | <b>1.02</b> |
| x11227         | <b>0.09</b> | 0.14        | x12227 | 0.15        | <b>0.09</b> |
| x11228         | 0.33        | <b>0.15</b> | x12228 | 0.46        | <b>0.20</b> |
| x11229         | 3.05        | <b>2.16</b> | x12229 | 3.24        | <b>1.57</b> |
| x11417         | <b>0.47</b> | 2.80        | x12417 | <b>1.09</b> | 2.35        |
| x11418         | <b>2.25</b> | 3.09        | x12418 | <b>1.82</b> | 1.88        |
| x11419         | 10.37       | <b>6.24</b> | x12419 | 5.97        | <b>3.73</b> |
| x11427         | <b>0.98</b> | 2.89        | x12427 | <b>0.59</b> | 2.79        |
| x11428         | 4.78        | <b>2.85</b> | x12428 | 3.91        | <b>3.13</b> |
| x11429         | 9.6         | <b>6.49</b> | x12429 | 8.00        | <b>4.40</b> |
| <b>Average</b> | 1.98        | <b>1.46</b> |        |             |             |

Each group consists of five instances and each instance has 10 items and 20 periods. The horizon decomposition implementation uses zero overlap and 10-period subproblems. HD is run on a machine that is approximately 70% faster than PD, with a time limit of 1,000s instead of 3,600s used in PD.

**Table A.8 Comparison of Horizon Decomposition and CPLEX.**

| $ I $ | CPLEX         |           |              | Horizon Decomposition |                |       |  |
|-------|---------------|-----------|--------------|-----------------------|----------------|-------|--|
|       | Final Gap (%) | Nodes     | $( H ,  L )$ | Final Gap (%)         | Gap Closed (%) | Nodes |  |
| 2     | 3.66          | 3,667,604 | (12,2)       | <b>0.43</b>           | 59.01          | 53.9  |  |
| 4     | 7.68          | 1,154,168 | (12,2)       | <b>4.60</b>           | 45.45          | 4.2   |  |
| 6     | 11.34         | 277,598   | (6,1)        | <b>11.03</b>          | 4.93           | 3     |  |
| 8     | 11.47         | 157,920   | (6,1)        | <b>11.45</b>          | 1.36           | 0.1   |  |
| 10    | 9.44          | 615,530   | (6,1)        | <b>7.27</b>           | 17.33          | 0     |  |

Time Limit: 3,600 seconds. Each value is an average of ten runs. The average final gap is calculated as  $\frac{v_{UB} - v_{LB}}{v_{UB}}$ . The gap closed is calculated as  $\frac{gap^{HD} - gap^{CPX}}{gap^{CPX}}$ , where each *gap* is calculated using the best upper bound found, and is a measure of improvement of the horizon decomposition lower bound over CPLEX.

## B. Detailed Computational Results

Table B.1 shows the detailed computational results for the subproblem length and overlap experiment.

Table B.1: Detailed computational results for the subproblem length and overlap experiment.

| Instance | Items | Periods | Length     | Overlap   | UB       | LB       | Gap    |
|----------|-------|---------|------------|-----------|----------|----------|--------|
| H02151   | 2     | 15      | 3 Periods  | 0 Overlap | 10465.44 | 9603.713 | 0.0575 |
| H02151   | 2     | 15      | 3 Periods  | 1 Overlap | 10282.8  | 9623.068 | 0.0556 |
| H02151   | 2     | 15      | 3 Periods  | 2 Overlap | 10465.44 | 9673.809 | 0.0506 |
| H02151   | 2     | 15      | 5 Periods  | 0 Overlap | 10189.72 | 9582.582 | 0.0596 |
| H02151   | 2     | 15      | 5 Periods  | 1 Overlap | 10189.72 | 9747.647 | 0.0434 |
| H02151   | 2     | 15      | 5 Periods  | 2 Overlap | 10189.72 | 9782.977 | 0.0399 |
| H02151   | 2     | 15      | 5 Periods  | 3 Overlap | 10189.72 | 9771.27  | 0.0411 |
| H02151   | 2     | 15      | 7 Periods  | 0 Overlap | 10189.72 | 9852.638 | 0.0331 |
| H02151   | 2     | 15      | 7 Periods  | 1 Overlap | 10533.49 | 9794.337 | 0.0388 |
| H02151   | 2     | 15      | 7 Periods  | 2 Overlap | 10446.59 | 9776.342 | 0.0406 |
| H02151   | 2     | 15      | 7 Periods  | 3 Overlap | 10263.95 | 9911.412 | 0.0273 |
| H02151   | 2     | 15      | 9 Periods  | 0 Overlap | 10189.72 | 9826.302 | 0.0357 |
| H02151   | 2     | 15      | 9 Periods  | 1 Overlap | 10189.72 | 9929.02  | 0.0256 |
| H02151   | 2     | 15      | 9 Periods  | 2 Overlap | 10189.72 | 9983.47  | 0.0202 |
| H02151   | 2     | 15      | 9 Periods  | 3 Overlap | 10189.72 | 10021.53 | 0.0165 |
| H02151   | 2     | 15      | 11 Periods | 0 Overlap | 10533.49 | 9817.831 | 0.0365 |
| H02151   | 2     | 15      | 11 Periods | 1 Overlap | 10446.59 | 9834.52  | 0.0349 |
| H02151   | 2     | 15      | 11 Periods | 2 Overlap | 10446.59 | 9834.52  | 0.0349 |
| H02151   | 2     | 15      | 11 Periods | 3 Overlap | 10263.95 | 9945.942 | 0.0239 |
| H02152   | 2     | 15      | 3 Periods  | 0 Overlap | 2369.052 | 2337.392 | 0.0134 |
| H02152   | 2     | 15      | 3 Periods  | 1 Overlap | 2369.052 | 2342.934 | 0.011  |
| H02152   | 2     | 15      | 3 Periods  | 2 Overlap | 2369.052 | 2367.57  | 0.0006 |
| H02152   | 2     | 15      | 5 Periods  | 0 Overlap | 2369.052 | 2358.992 | 0.0042 |
| H02152   | 2     | 15      | 5 Periods  | 1 Overlap | 2369.052 | 2369.052 | 0      |

|        |   |    |            |           |          |          |        |
|--------|---|----|------------|-----------|----------|----------|--------|
| H02152 | 2 | 15 | 5 Periods  | 2 Overlap | 2369.052 | 2368.984 | 0      |
| H02152 | 2 | 15 | 5 Periods  | 3 Overlap | 2369.052 | 2369.052 | 0      |
| H02152 | 2 | 15 | 7 Periods  | 0 Overlap | 2369.052 | 2369.052 | 0      |
| H02152 | 2 | 15 | 7 Periods  | 1 Overlap | 2369.052 | 2369.052 | 0      |
| H02152 | 2 | 15 | 7 Periods  | 2 Overlap | 2369.052 | 2368.452 | 0.0003 |
| H02152 | 2 | 15 | 7 Periods  | 3 Overlap | 2369.052 | 2369.052 | 0      |
| H02152 | 2 | 15 | 9 Periods  | 0 Overlap | 2369.052 | 2362.046 | 0.003  |
| H02152 | 2 | 15 | 9 Periods  | 1 Overlap | 2369.052 | 2369.052 | 0      |
| H02152 | 2 | 15 | 9 Periods  | 2 Overlap | 2369.052 | 2369.052 | 0      |
| H02152 | 2 | 15 | 9 Periods  | 3 Overlap | 2369.052 | 2369.052 | 0      |
| H02152 | 2 | 15 | 11 Periods | 0 Overlap | 2369.052 | 2267.682 | 0.0428 |
| H02152 | 2 | 15 | 11 Periods | 1 Overlap | 2369.052 | 2368.23  | 0.0003 |
| H02152 | 2 | 15 | 11 Periods | 2 Overlap | 2369.052 | 2368.984 | 0      |
| H02152 | 2 | 15 | 11 Periods | 3 Overlap | 2369.052 | 2369.052 | 0      |
| H02301 | 2 | 30 | 3 Periods  | 0 Overlap | 23910.29 | 22205.42 | 0.0713 |
| H02301 | 2 | 30 | 3 Periods  | 1 Overlap | 23910.29 | 21573.91 | 0.0977 |
| H02301 | 2 | 30 | 3 Periods  | 2 Overlap | 23910.29 | 22286.79 | 0.0679 |
| H02301 | 2 | 30 | 5 Periods  | 0 Overlap | 23910.29 | 22002.35 | 0.0798 |
| H02301 | 2 | 30 | 5 Periods  | 1 Overlap | 23910.29 | 22243.31 | 0.0697 |
| H02301 | 2 | 30 | 5 Periods  | 2 Overlap | 23910.29 | 22682.53 | 0.0513 |
| H02301 | 2 | 30 | 5 Periods  | 3 Overlap | 23910.29 | 22794.04 | 0.0467 |
| H02301 | 2 | 30 | 7 Periods  | 0 Overlap | 23910.29 | 22173.2  | 0.0727 |
| H02301 | 2 | 30 | 7 Periods  | 1 Overlap | 23910.29 | 22936.74 | 0.0407 |
| H02301 | 2 | 30 | 7 Periods  | 2 Overlap | 23910.29 | 22731.01 | 0.0493 |
| H02301 | 2 | 30 | 7 Periods  | 3 Overlap | 23910.29 | 23094.57 | 0.0341 |
| H02301 | 2 | 30 | 9 Periods  | 0 Overlap | 23910.29 | 22572.85 | 0.0559 |
| H02301 | 2 | 30 | 9 Periods  | 1 Overlap | 23910.29 | 23102.22 | 0.0338 |
| H02301 | 2 | 30 | 9 Periods  | 2 Overlap | 23910.29 | 23366.32 | 0.0228 |
| H02301 | 2 | 30 | 9 Periods  | 3 Overlap | 23910.29 | 23072.28 | 0.035  |
| H02301 | 2 | 30 | 11 Periods | 0 Overlap | 23910.29 | 23440.58 | 0.0196 |
| H02301 | 2 | 30 | 11 Periods | 1 Overlap | 23910.29 | 23608.23 | 0.0126 |

|        |   |    |            |           |          |          |        |
|--------|---|----|------------|-----------|----------|----------|--------|
| H02301 | 2 | 30 | 11 Periods | 2 Overlap | 23910.29 | 23115.99 | 0.0332 |
| H02301 | 2 | 30 | 11 Periods | 3 Overlap | 23910.29 | 23313.28 | 0.025  |
| H02302 | 2 | 30 | 3 Periods  | 0 Overlap | 3691.034 | 2982.628 | 0.1919 |
| H02302 | 2 | 30 | 3 Periods  | 1 Overlap | 3691.034 | 3186.444 | 0.1367 |
| H02302 | 2 | 30 | 3 Periods  | 2 Overlap | 3691.034 | 3348.184 | 0.0929 |
| H02302 | 2 | 30 | 5 Periods  | 0 Overlap | 3691.034 | 3341.974 | 0.0946 |
| H02302 | 2 | 30 | 5 Periods  | 1 Overlap | 3691.034 | 3472.957 | 0.0591 |
| H02302 | 2 | 30 | 5 Periods  | 2 Overlap | 3691.034 | 3566.585 | 0.0337 |
| H02302 | 2 | 30 | 5 Periods  | 3 Overlap | 3691.034 | 3613.855 | 0.0209 |
| H02302 | 2 | 30 | 7 Periods  | 0 Overlap | 3691.034 | 3490.162 | 0.0544 |
| H02302 | 2 | 30 | 7 Periods  | 1 Overlap | 3691.034 | 3611.335 | 0.0216 |
| H02302 | 2 | 30 | 7 Periods  | 2 Overlap | 3691.034 | 3590.553 | 0.0272 |
| H02302 | 2 | 30 | 7 Periods  | 3 Overlap | 3691.034 | 3648.106 | 0.0116 |
| H02302 | 2 | 30 | 9 Periods  | 0 Overlap | 3691.034 | 3553.928 | 0.0371 |
| H02302 | 2 | 30 | 9 Periods  | 1 Overlap | 3691.034 | 3480.479 | 0.057  |
| H02302 | 2 | 30 | 9 Periods  | 2 Overlap | 3691.034 | 3594.718 | 0.0261 |
| H02302 | 2 | 30 | 9 Periods  | 3 Overlap | 3691.034 | 3637.713 | 0.0144 |
| H02302 | 2 | 30 | 11 Periods | 0 Overlap | 3691.034 | 3610.8   | 0.0217 |
| H02302 | 2 | 30 | 11 Periods | 1 Overlap | 3691.034 | 3691.034 | 0      |
| H02302 | 2 | 30 | 11 Periods | 2 Overlap | 3691.034 | 3691.034 | 0      |
| H02302 | 2 | 30 | 11 Periods | 3 Overlap | 3691.034 | 3691.034 | 0      |
| H02303 | 2 | 30 | 3 Periods  | 0 Overlap | 22632.87 | 21300.37 | 0.0589 |
| H02303 | 2 | 30 | 3 Periods  | 1 Overlap | 22632.87 | 21474.57 | 0.0512 |
| H02303 | 2 | 30 | 3 Periods  | 2 Overlap | 22632.87 | 21500.01 | 0.0501 |
| H02303 | 2 | 30 | 5 Periods  | 0 Overlap | 22632.87 | 21445.98 | 0.0524 |
| H02303 | 2 | 30 | 5 Periods  | 1 Overlap | 22632.87 | 21488.64 | 0.0506 |
| H02303 | 2 | 30 | 5 Periods  | 2 Overlap | 22632.87 | 21501.01 | 0.05   |
| H02303 | 2 | 30 | 5 Periods  | 3 Overlap | 22632.87 | 21505.39 | 0.0498 |
| H02303 | 2 | 30 | 7 Periods  | 0 Overlap | 22632.87 | 21501.52 | 0.05   |
| H02303 | 2 | 30 | 7 Periods  | 1 Overlap | 22632.87 | 21495.36 | 0.0503 |
| H02303 | 2 | 30 | 7 Periods  | 2 Overlap | 22632.87 | 21549.41 | 0.0479 |

|        |   |    |            |           |          |          |        |
|--------|---|----|------------|-----------|----------|----------|--------|
| H02303 | 2 | 30 | 7 Periods  | 3 Overlap | 22632.87 | 21544.1  | 0.0481 |
| H02303 | 2 | 30 | 9 Periods  | 0 Overlap | 22632.87 | 21348.6  | 0.0567 |
| H02303 | 2 | 30 | 9 Periods  | 1 Overlap | 22632.87 | 21491.15 | 0.0504 |
| H02303 | 2 | 30 | 9 Periods  | 2 Overlap | 22632.87 | 21504.2  | 0.0499 |
| H02303 | 2 | 30 | 9 Periods  | 3 Overlap | 22632.87 | 21549.41 | 0.0479 |
| H02303 | 2 | 30 | 11 Periods | 0 Overlap | 22632.87 | 21505.56 | 0.0498 |
| H02303 | 2 | 30 | 11 Periods | 1 Overlap | 22632.87 | 21536.39 | 0.0484 |
| H02303 | 2 | 30 | 11 Periods | 2 Overlap | 22632.87 | 21536.39 | 0.0484 |
| H02303 | 2 | 30 | 11 Periods | 3 Overlap | 22632.87 | 21544.1  | 0.0481 |
| H02304 | 2 | 30 | 3 Periods  | 0 Overlap | 13845.26 | 12623.24 | 0.0883 |
| H02304 | 2 | 30 | 3 Periods  | 1 Overlap | 13845.26 | 12983.62 | 0.0622 |
| H02304 | 2 | 30 | 3 Periods  | 2 Overlap | 13845.26 | 13227.36 | 0.0446 |
| H02304 | 2 | 30 | 5 Periods  | 0 Overlap | 13845.26 | 13500.59 | 0.0249 |
| H02304 | 2 | 30 | 5 Periods  | 1 Overlap | 13845.26 | 13187.15 | 0.0475 |
| H02304 | 2 | 30 | 5 Periods  | 2 Overlap | 13845.26 | 13473.77 | 0.0268 |
| H02304 | 2 | 30 | 5 Periods  | 3 Overlap | 13845.26 | 13596.55 | 0.018  |
| H02304 | 2 | 30 | 7 Periods  | 0 Overlap | 13845.26 | 13163.05 | 0.0493 |
| H02304 | 2 | 30 | 7 Periods  | 1 Overlap | 13845.26 | 13634.14 | 0.0152 |
| H02304 | 2 | 30 | 7 Periods  | 2 Overlap | 13845.26 | 13568.1  | 0.02   |
| H02304 | 2 | 30 | 7 Periods  | 3 Overlap | 13845.26 | 13677.08 | 0.0121 |
| H02304 | 2 | 30 | 9 Periods  | 0 Overlap | 13845.26 | 13346.77 | 0.036  |
| H02304 | 2 | 30 | 9 Periods  | 1 Overlap | 13845.26 | 13747.33 | 0.0071 |
| H02304 | 2 | 30 | 9 Periods  | 2 Overlap | 13845.26 | 13803.46 | 0.003  |
| H02304 | 2 | 30 | 9 Periods  | 3 Overlap | 13845.26 | 13749.51 | 0.0069 |
| H02304 | 2 | 30 | 11 Periods | 0 Overlap | 13845.26 | 13655.66 | 0.0137 |
| H02304 | 2 | 30 | 11 Periods | 1 Overlap | 13845.26 | 13720    | 0.009  |
| H02304 | 2 | 30 | 11 Periods | 2 Overlap | 13845.26 | 13673.3  | 0.0124 |
| H02304 | 2 | 30 | 11 Periods | 3 Overlap | 13845.26 | 13782.72 | 0.0045 |
| H02601 | 2 | 60 | 3 Periods  | 0 Overlap | 187687.6 | 186326.4 | 0.0073 |
| H02601 | 2 | 60 | 3 Periods  | 1 Overlap | 187687.6 | 186524.5 | 0.0062 |
| H02601 | 2 | 60 | 3 Periods  | 2 Overlap | 187687.6 | 186683.9 | 0.0053 |

|        |   |    |            |           |          |          |        |
|--------|---|----|------------|-----------|----------|----------|--------|
| H02601 | 2 | 60 | 5 Periods  | 0 Overlap | 187687.6 | 186679.7 | 0.0054 |
| H02601 | 2 | 60 | 5 Periods  | 1 Overlap | 187687.6 | 186763.1 | 0.0049 |
| H02601 | 2 | 60 | 5 Periods  | 2 Overlap | 187687.6 | 186868   | 0.0044 |
| H02601 | 2 | 60 | 5 Periods  | 3 Overlap | 187687.6 | 186968.5 | 0.0038 |
| H02601 | 2 | 60 | 7 Periods  | 0 Overlap | 187687.6 | 186765.9 | 0.0049 |
| H02601 | 2 | 60 | 7 Periods  | 1 Overlap | 187687.6 | 186855.9 | 0.0044 |
| H02601 | 2 | 60 | 7 Periods  | 2 Overlap | 187687.6 | 187046.8 | 0.0034 |
| H02601 | 2 | 60 | 7 Periods  | 3 Overlap | 187687.6 | 187162.8 | 0.0028 |
| H02601 | 2 | 60 | 9 Periods  | 0 Overlap | 187687.6 | 186977.5 | 0.0038 |
| H02601 | 2 | 60 | 9 Periods  | 1 Overlap | 187687.6 | 187088.7 | 0.0032 |
| H02601 | 2 | 60 | 9 Periods  | 2 Overlap | 187687.6 | 187135.1 | 0.0029 |
| H02601 | 2 | 60 | 9 Periods  | 3 Overlap | 187687.6 | 187179.9 | 0.0027 |
| H02601 | 2 | 60 | 11 Periods | 0 Overlap | 187687.6 | 187172   | 0.0027 |
| H02601 | 2 | 60 | 11 Periods | 1 Overlap | 187687.6 | 187273.7 | 0.0022 |
| H02601 | 2 | 60 | 11 Periods | 2 Overlap | 187687.6 | 187044.9 | 0.0034 |
| H02601 | 2 | 60 | 11 Periods | 3 Overlap | 187687.6 | 187299   | 0.0021 |
| H02602 | 2 | 60 | 3 Periods  | 0 Overlap | 207270.8 | 205649.2 | 0.0078 |
| H02602 | 2 | 60 | 3 Periods  | 1 Overlap | 207270.8 | 205741   | 0.0074 |
| H02602 | 2 | 60 | 3 Periods  | 2 Overlap | 207270.8 | 205787.4 | 0.0072 |
| H02602 | 2 | 60 | 5 Periods  | 0 Overlap | 207270.8 | 205851.6 | 0.0068 |
| H02602 | 2 | 60 | 5 Periods  | 1 Overlap | 207270.8 | 205846   | 0.0069 |
| H02602 | 2 | 60 | 5 Periods  | 2 Overlap | 207270.8 | 205880.7 | 0.0067 |
| H02602 | 2 | 60 | 5 Periods  | 3 Overlap | 207270.8 | 205949.9 | 0.0064 |
| H02602 | 2 | 60 | 7 Periods  | 0 Overlap | 207270.8 | 205923.7 | 0.0065 |
| H02602 | 2 | 60 | 7 Periods  | 1 Overlap | 207270.8 | 205940.2 | 0.0064 |
| H02602 | 2 | 60 | 7 Periods  | 2 Overlap | 207270.8 | 206006.1 | 0.0061 |
| H02602 | 2 | 60 | 7 Periods  | 3 Overlap | 207270.8 | 205992.1 | 0.0062 |
| H02602 | 2 | 60 | 9 Periods  | 0 Overlap | 207270.8 | 205982.8 | 0.0062 |
| H02602 | 2 | 60 | 9 Periods  | 1 Overlap | 207270.8 | 205945   | 0.0064 |
| H02602 | 2 | 60 | 9 Periods  | 2 Overlap | 207270.8 | 206023.1 | 0.006  |
| H02602 | 2 | 60 | 9 Periods  | 3 Overlap | 207270.8 | 206029   | 0.006  |

|        |   |    |            |           |          |          |        |
|--------|---|----|------------|-----------|----------|----------|--------|
| H02602 | 2 | 60 | 11 Periods | 0 Overlap | 207270.8 | 206116.6 | 0.0056 |
| H02602 | 2 | 60 | 11 Periods | 1 Overlap | 207270.8 | 206107.5 | 0.0056 |
| H02602 | 2 | 60 | 11 Periods | 2 Overlap | 207270.8 | 206012.3 | 0.0061 |
| H02602 | 2 | 60 | 11 Periods | 3 Overlap | 207270.8 | 206106.7 | 0.0056 |
| H02603 | 2 | 60 | 3 Periods  | 0 Overlap | 129766.5 | 124440   | 0.041  |
| H02603 | 2 | 60 | 3 Periods  | 1 Overlap | 129766.5 | 125660.2 | 0.0316 |
| H02603 | 2 | 60 | 3 Periods  | 2 Overlap | 129766.5 | 126013.6 | 0.0289 |
| H02603 | 2 | 60 | 5 Periods  | 0 Overlap | 129766.5 | 126016.9 | 0.0289 |
| H02603 | 2 | 60 | 5 Periods  | 1 Overlap | 129766.5 | 125955.7 | 0.0294 |
| H02603 | 2 | 60 | 5 Periods  | 2 Overlap | 129766.5 | 126337   | 0.0264 |
| H02603 | 2 | 60 | 5 Periods  | 3 Overlap | 129766.5 | 126523.3 | 0.025  |
| H02603 | 2 | 60 | 7 Periods  | 0 Overlap | 129766.5 | 126315.8 | 0.0266 |
| H02603 | 2 | 60 | 7 Periods  | 1 Overlap | 129766.5 | 126475.7 | 0.0254 |
| H02603 | 2 | 60 | 7 Periods  | 2 Overlap | 129766.5 | 126893.2 | 0.0221 |
| H02603 | 2 | 60 | 7 Periods  | 3 Overlap | 129766.5 | 127106.2 | 0.0205 |
| H02603 | 2 | 60 | 9 Periods  | 0 Overlap | 129766.5 | 126855   | 0.0224 |
| H02603 | 2 | 60 | 9 Periods  | 1 Overlap | 129766.5 | 126632.8 | 0.0241 |
| H02603 | 2 | 60 | 9 Periods  | 2 Overlap | 129766.5 | 127357.5 | 0.0186 |
| H02603 | 2 | 60 | 9 Periods  | 3 Overlap | 129766.5 | 126947.8 | 0.0217 |
| H02603 | 2 | 60 | 11 Periods | 0 Overlap | 129766.5 | 126861.5 | 0.0224 |
| H02603 | 2 | 60 | 11 Periods | 1 Overlap | 129766.5 | 127573.9 | 0.0169 |
| H02603 | 2 | 60 | 11 Periods | 2 Overlap | 129766.5 | 127353.7 | 0.0186 |
| H02603 | 2 | 60 | 11 Periods | 3 Overlap | 129766.5 | 127768.4 | 0.0154 |
| H02604 | 2 | 60 | 3 Periods  | 0 Overlap | 81293.93 | 78671.42 | 0.0323 |
| H02604 | 2 | 60 | 3 Periods  | 1 Overlap | 81293.93 | 79006    | 0.0281 |
| H02604 | 2 | 60 | 3 Periods  | 2 Overlap | 81293.93 | 79109.98 | 0.0269 |
| H02604 | 2 | 60 | 5 Periods  | 0 Overlap | 81293.93 | 79360.69 | 0.0238 |
| H02604 | 2 | 60 | 5 Periods  | 1 Overlap | 81293.93 | 79495.87 | 0.0221 |
| H02604 | 2 | 60 | 5 Periods  | 2 Overlap | 81293.93 | 79920.85 | 0.0169 |
| H02604 | 2 | 60 | 5 Periods  | 3 Overlap | 81293.93 | 79898.77 | 0.0172 |
| H02604 | 2 | 60 | 7 Periods  | 0 Overlap | 81293.93 | 79568.92 | 0.0212 |

|        |   |    |            |           |          |          |        |
|--------|---|----|------------|-----------|----------|----------|--------|
| H02604 | 2 | 60 | 7 Periods  | 1 Overlap | 81293.93 | 80103.07 | 0.0146 |
| H02604 | 2 | 60 | 7 Periods  | 2 Overlap | 81293.93 | 79548.18 | 0.0215 |
| H02604 | 2 | 60 | 7 Periods  | 3 Overlap | 81293.93 | 79958.35 | 0.0164 |
| H02604 | 2 | 60 | 9 Periods  | 0 Overlap | 81293.93 | 80091.32 | 0.0148 |
| H02604 | 2 | 60 | 9 Periods  | 1 Overlap | 81293.93 | 79727.38 | 0.0193 |
| H02604 | 2 | 60 | 9 Periods  | 2 Overlap | 81293.93 | 79650.61 | 0.0202 |
| H02604 | 2 | 60 | 9 Periods  | 3 Overlap | 81293.93 | 80298.26 | 0.0122 |
| H02604 | 2 | 60 | 11 Periods | 0 Overlap | 81293.93 | 79514.78 | 0.0219 |
| H02604 | 2 | 60 | 11 Periods | 1 Overlap | 81293.93 | 80159.77 | 0.014  |
| H02604 | 2 | 60 | 11 Periods | 2 Overlap | 81293.93 | 80253.08 | 0.0128 |
| H02604 | 2 | 60 | 11 Periods | 3 Overlap | 81293.93 | 80266.98 | 0.0126 |
| H06151 | 6 | 15 | 3 Periods  | 0 Overlap | 38350.29 | 36406.38 | 0.0371 |
| H06151 | 6 | 15 | 3 Periods  | 1 Overlap | 38120.08 | 37410.45 | 0.0105 |
| H06151 | 6 | 15 | 3 Periods  | 2 Overlap | 38089.08 | 37609.18 | 0.0053 |
| H06151 | 6 | 15 | 5 Periods  | 0 Overlap | 38103.65 | 37005.74 | 0.0212 |
| H06151 | 6 | 15 | 5 Periods  | 1 Overlap | 37999.2  | 37701.06 | 0.0029 |
| H06151 | 6 | 15 | 5 Periods  | 2 Overlap | 37809    | 37809    | 0      |
| H06151 | 6 | 15 | 5 Periods  | 3 Overlap | 37809    | 37809    | 0      |
| H06151 | 6 | 15 | 7 Periods  | 0 Overlap | 38061.67 | 37497.83 | 0.0082 |
| H06151 | 6 | 15 | 7 Periods  | 1 Overlap | 37809    | 37725.71 | 0.0022 |
| H06151 | 6 | 15 | 7 Periods  | 2 Overlap | 37809    | 37809    | 0      |
| H06151 | 6 | 15 | 7 Periods  | 3 Overlap | 37809    | 37809    | 0      |
| H06151 | 6 | 15 | 9 Periods  | 0 Overlap | 38138.31 | 37601.15 | 0.0055 |
| H06151 | 6 | 15 | 9 Periods  | 1 Overlap | 37809    | 37798.5  | 0.0003 |
| H06151 | 6 | 15 | 9 Periods  | 2 Overlap | 37809    | 37809    | 0      |
| H06151 | 6 | 15 | 9 Periods  | 3 Overlap | 37809    | 37809    | 0      |
| H06151 | 6 | 15 | 11 Periods | 0 Overlap | 38087.13 | 37608.61 | 0.0053 |
| H06151 | 6 | 15 | 11 Periods | 1 Overlap | 37809    | 37729.6  | 0.0021 |
| H06151 | 6 | 15 | 11 Periods | 2 Overlap | 37809    | 37809    | 0      |
| H06151 | 6 | 15 | 11 Periods | 3 Overlap | 37809    | 37809    | 0      |
| H06152 | 6 | 15 | 3 Periods  | 0 Overlap | 38159    | 36156.48 | 0.0415 |

|        |   |    |            |           |       |          |        |
|--------|---|----|------------|-----------|-------|----------|--------|
| H06152 | 6 | 15 | 3 Periods  | 1 Overlap | 38054 | 37190.13 | 0.0141 |
| H06152 | 6 | 15 | 3 Periods  | 2 Overlap | 37798 | 37466    | 0.0068 |
| H06152 | 6 | 15 | 5 Periods  | 0 Overlap | 38059 | 37015.51 | 0.0187 |
| H06152 | 6 | 15 | 5 Periods  | 1 Overlap | 37773 | 37543.21 | 0.0047 |
| H06152 | 6 | 15 | 5 Periods  | 2 Overlap | 37798 | 37689.38 | 0.0008 |
| H06152 | 6 | 15 | 5 Periods  | 3 Overlap | 37798 | 37676.43 | 0.0012 |
| H06152 | 6 | 15 | 7 Periods  | 0 Overlap | 37798 | 37198.69 | 0.0138 |
| H06152 | 6 | 15 | 7 Periods  | 1 Overlap | 37798 | 37544.55 | 0.0047 |
| H06152 | 6 | 15 | 7 Periods  | 2 Overlap | 37721 | 37663.44 | 0.0015 |
| H06152 | 6 | 15 | 7 Periods  | 3 Overlap | 37721 | 37713.71 | 0.0002 |
| H06152 | 6 | 15 | 9 Periods  | 0 Overlap | 37889 | 37451.01 | 0.0072 |
| H06152 | 6 | 15 | 9 Periods  | 1 Overlap | 37767 | 37654.16 | 0.0018 |
| H06152 | 6 | 15 | 9 Periods  | 2 Overlap | 37721 | 37687.15 | 0.0009 |
| H06152 | 6 | 15 | 9 Periods  | 3 Overlap | 37721 | 37721    | 0      |
| H06152 | 6 | 15 | 11 Periods | 0 Overlap | 37773 | 37554.7  | 0.0044 |
| H06152 | 6 | 15 | 11 Periods | 1 Overlap | 37721 | 37666.58 | 0.0014 |
| H06152 | 6 | 15 | 11 Periods | 2 Overlap | 37721 | 37712.92 | 0.0002 |
| H06152 | 6 | 15 | 11 Periods | 3 Overlap | 37721 | 37714.9  | 0.0002 |
| H06301 | 6 | 30 | 3 Periods  | 0 Overlap | 73082 | 68224.39 | 0.0456 |
| H06301 | 6 | 30 | 3 Periods  | 1 Overlap | 71776 | 70083.9  | 0.0196 |
| H06301 | 6 | 30 | 3 Periods  | 2 Overlap | 71526 | 70553.29 | 0.013  |
| H06301 | 6 | 30 | 5 Periods  | 0 Overlap | 72876 | 69445.3  | 0.0285 |
| H06301 | 6 | 30 | 5 Periods  | 1 Overlap | 71864 | 70703.72 | 0.0109 |
| H06301 | 6 | 30 | 5 Periods  | 2 Overlap | 71861 | 71105.51 | 0.0053 |
| H06301 | 6 | 30 | 5 Periods  | 3 Overlap | 71512 | 71261.28 | 0.0031 |
| H06301 | 6 | 30 | 7 Periods  | 0 Overlap | 72573 | 70144.44 | 0.0187 |
| H06301 | 6 | 30 | 7 Periods  | 1 Overlap | 71749 | 71116.58 | 0.0051 |
| H06301 | 6 | 30 | 7 Periods  | 2 Overlap | 72206 | 71211.28 | 0.0038 |
| H06301 | 6 | 30 | 7 Periods  | 3 Overlap | 71489 | 71346.62 | 0.0019 |
| H06301 | 6 | 30 | 9 Periods  | 0 Overlap | 72295 | 70342.06 | 0.016  |
| H06301 | 6 | 30 | 9 Periods  | 1 Overlap | 72245 | 71236.74 | 0.0035 |

|        |   |    |            |           |       |          |        |
|--------|---|----|------------|-----------|-------|----------|--------|
| H06301 | 6 | 30 | 9 Periods  | 2 Overlap | 71546 | 71392.94 | 0.0013 |
| H06301 | 6 | 30 | 9 Periods  | 3 Overlap | 71488 | 71454.31 | 0.0004 |
| H06301 | 6 | 30 | 11 Periods | 0 Overlap | 71599 | 70576.52 | 0.0127 |
| H06301 | 6 | 30 | 11 Periods | 1 Overlap | 71489 | 71320.97 | 0.0023 |
| H06301 | 6 | 30 | 11 Periods | 2 Overlap | 71484 | 71453.23 | 0.0004 |
| H06301 | 6 | 30 | 11 Periods | 3 Overlap | 71484 | 71484    | 0      |
| H06302 | 6 | 30 | 3 Periods  | 0 Overlap | 66078 | 60606.03 | 0.0553 |
| H06302 | 6 | 30 | 3 Periods  | 1 Overlap | 64490 | 62785.79 | 0.0214 |
| H06302 | 6 | 30 | 3 Periods  | 2 Overlap | 64544 | 63265.91 | 0.0139 |
| H06302 | 6 | 30 | 5 Periods  | 0 Overlap | 65266 | 61835.32 | 0.0362 |
| H06302 | 6 | 30 | 5 Periods  | 1 Overlap | 64352 | 63584.08 | 0.0089 |
| H06302 | 6 | 30 | 5 Periods  | 2 Overlap | 64194 | 63774.47 | 0.0059 |
| H06302 | 6 | 30 | 5 Periods  | 3 Overlap | 64430 | 63887.1  | 0.0042 |
| H06302 | 6 | 30 | 7 Periods  | 0 Overlap | 64803 | 62760.09 | 0.0218 |
| H06302 | 6 | 30 | 7 Periods  | 1 Overlap | 64420 | 63674.96 | 0.0075 |
| H06302 | 6 | 30 | 7 Periods  | 2 Overlap | 64181 | 63881.61 | 0.0043 |
| H06302 | 6 | 30 | 7 Periods  | 3 Overlap | 64181 | 64019.32 | 0.0021 |
| H06302 | 6 | 30 | 9 Periods  | 0 Overlap | 65584 | 63008.38 | 0.0179 |
| H06302 | 6 | 30 | 9 Periods  | 1 Overlap | 64181 | 63923.63 | 0.0036 |
| H06302 | 6 | 30 | 9 Periods  | 2 Overlap | 64192 | 64039.09 | 0.0018 |
| H06302 | 6 | 30 | 9 Periods  | 3 Overlap | 64181 | 64115.9  | 0.0006 |
| H06302 | 6 | 30 | 11 Periods | 0 Overlap | 64531 | 62922.44 | 0.0192 |
| H06302 | 6 | 30 | 11 Periods | 1 Overlap | 64181 | 63857.85 | 0.0046 |
| H06302 | 6 | 30 | 11 Periods | 2 Overlap | 64181 | 64046.52 | 0.0017 |
| H06302 | 6 | 30 | 11 Periods | 3 Overlap | 64156 | 64114.41 | 0.0006 |
| H06303 | 6 | 30 | 3 Periods  | 0 Overlap | 66300 | 61776.56 | 0.0512 |
| H06303 | 6 | 30 | 3 Periods  | 1 Overlap | 65605 | 63217.87 | 0.029  |
| H06303 | 6 | 30 | 3 Periods  | 2 Overlap | 65111 | 63709.07 | 0.0215 |
| H06303 | 6 | 30 | 5 Periods  | 0 Overlap | 67832 | 62674.43 | 0.0374 |
| H06303 | 6 | 30 | 5 Periods  | 1 Overlap | 65195 | 64154.17 | 0.0146 |
| H06303 | 6 | 30 | 5 Periods  | 2 Overlap | 65195 | 64232.05 | 0.0135 |

|        |   |    |            |           |        |          |        |
|--------|---|----|------------|-----------|--------|----------|--------|
| H06303 | 6 | 30 | 5 Periods  | 3 Overlap | 65195  | 64465.2  | 0.0099 |
| H06303 | 6 | 30 | 7 Periods  | 0 Overlap | 65991  | 63486.98 | 0.0249 |
| H06303 | 6 | 30 | 7 Periods  | 1 Overlap | 65108  | 64400.7  | 0.0109 |
| H06303 | 6 | 30 | 7 Periods  | 2 Overlap | 65111  | 64548.23 | 0.0086 |
| H06303 | 6 | 30 | 7 Periods  | 3 Overlap | 65195  | 64633.23 | 0.0073 |
| H06303 | 6 | 30 | 9 Periods  | 0 Overlap | 65741  | 63948.64 | 0.0178 |
| H06303 | 6 | 30 | 9 Periods  | 1 Overlap | 65330  | 64640.71 | 0.0072 |
| H06303 | 6 | 30 | 9 Periods  | 2 Overlap | 65178  | 64743.9  | 0.0056 |
| H06303 | 6 | 30 | 9 Periods  | 3 Overlap | 65277  | 64819.63 | 0.0044 |
| H06303 | 6 | 30 | 11 Periods | 0 Overlap | 66318  | 64444.63 | 0.0102 |
| H06303 | 6 | 30 | 11 Periods | 1 Overlap | 65150  | 64828.02 | 0.0043 |
| H06303 | 6 | 30 | 11 Periods | 2 Overlap | 65108  | 64740.82 | 0.0056 |
| H06303 | 6 | 30 | 11 Periods | 3 Overlap | 65195  | 64910.43 | 0.003  |
| H06304 | 6 | 30 | 3 Periods  | 0 Overlap | 86461  | 76919.76 | 0.0789 |
| H06304 | 6 | 30 | 3 Periods  | 1 Overlap | 83935  | 81758.83 | 0.0209 |
| H06304 | 6 | 30 | 3 Periods  | 2 Overlap | 83700  | 82560.66 | 0.0113 |
| H06304 | 6 | 30 | 5 Periods  | 0 Overlap | 104595 | 79620.29 | 0.0465 |
| H06304 | 6 | 30 | 5 Periods  | 1 Overlap | 83640  | 82783.79 | 0.0087 |
| H06304 | 6 | 30 | 5 Periods  | 2 Overlap | 83696  | 83076.81 | 0.0052 |
| H06304 | 6 | 30 | 5 Periods  | 3 Overlap | 83735  | 83194.19 | 0.0037 |
| H06304 | 6 | 30 | 7 Periods  | 0 Overlap | 84242  | 80792.48 | 0.0325 |
| H06304 | 6 | 30 | 7 Periods  | 1 Overlap | 83729  | 82990.62 | 0.0062 |
| H06304 | 6 | 30 | 7 Periods  | 2 Overlap | 83647  | 83252.85 | 0.003  |
| H06304 | 6 | 30 | 7 Periods  | 3 Overlap | 83507  | 83335.01 | 0.0021 |
| H06304 | 6 | 30 | 9 Periods  | 0 Overlap | 84512  | 81617.84 | 0.0226 |
| H06304 | 6 | 30 | 9 Periods  | 1 Overlap | 83857  | 83188.13 | 0.0038 |
| H06304 | 6 | 30 | 9 Periods  | 2 Overlap | 83581  | 83382.34 | 0.0015 |
| H06304 | 6 | 30 | 9 Periods  | 3 Overlap | 83645  | 83425.82 | 0.001  |
| H06304 | 6 | 30 | 11 Periods | 0 Overlap | 84123  | 81870.39 | 0.0196 |
| H06304 | 6 | 30 | 11 Periods | 1 Overlap | 83594  | 83241.93 | 0.0032 |
| H06304 | 6 | 30 | 11 Periods | 2 Overlap | 83581  | 83399.08 | 0.0013 |

|        |   |    |            |           |        |          |        |
|--------|---|----|------------|-----------|--------|----------|--------|
| H06304 | 6 | 30 | 11 Periods | 3 Overlap | 83507  | 83415.87 | 0.0011 |
| H06601 | 6 | 30 | 3 Periods  | 0 Overlap | 146222 | 135930.7 | 0.0453 |
| H06601 | 6 | 30 | 3 Periods  | 1 Overlap | 144422 | 139694.3 | 0.0189 |
| H06601 | 6 | 30 | 3 Periods  | 2 Overlap | 146135 | 140641.6 | 0.0122 |
| H06601 | 6 | 60 | 5 Periods  | 0 Overlap | 145407 | 138229.7 | 0.0292 |
| H06601 | 6 | 60 | 5 Periods  | 1 Overlap | 143149 | 141128.6 | 0.0088 |
| H06601 | 6 | 60 | 5 Periods  | 2 Overlap | 142912 | 141669.7 | 0.005  |
| H06601 | 6 | 60 | 5 Periods  | 3 Overlap | 142562 | 139221.9 | 0.0222 |
| H06601 | 6 | 60 | 7 Periods  | 0 Overlap | 144935 | 139326.5 | 0.0215 |
| H06601 | 6 | 60 | 7 Periods  | 1 Overlap | 142666 | 141741.4 | 0.0045 |
| H06601 | 6 | 60 | 7 Periods  | 2 Overlap | 143279 | 141923.9 | 0.0032 |
| H06601 | 6 | 60 | 7 Periods  | 3 Overlap | 142389 | 142207.4 | 0.0012 |
| H06601 | 6 | 60 | 9 Periods  | 0 Overlap | 144062 | 140229.7 | 0.0151 |
| H06601 | 6 | 60 | 9 Periods  | 1 Overlap | 142695 | 141962.8 | 0.003  |
| H06601 | 6 | 60 | 9 Periods  | 2 Overlap | 142473 | 142185.4 | 0.0014 |
| H06601 | 6 | 60 | 9 Periods  | 3 Overlap | 142388 | 140669.1 | 0.012  |
| H06601 | 6 | 60 | 11 Periods | 0 Overlap | 143471 | 140538.5 | 0.013  |
| H06601 | 6 | 60 | 11 Periods | 1 Overlap | 142389 | 142061.4 | 0.0023 |
| H06601 | 6 | 60 | 11 Periods | 2 Overlap | 142575 | 142336.3 | 0.0003 |
| H06601 | 6 | 60 | 11 Periods | 3 Overlap | 142384 | 142355.6 | 0.0002 |
| H06602 | 6 | 60 | 3 Periods  | 0 Overlap | 131934 | 119992.5 | 0.0566 |
| H06602 | 6 | 60 | 3 Periods  | 1 Overlap | 128999 | 124461.8 | 0.0215 |
| H06602 | 6 | 60 | 3 Periods  | 2 Overlap | 129673 | 125477.1 | 0.0135 |
| H06602 | 6 | 60 | 5 Periods  | 0 Overlap | 129522 | 122407.1 | 0.0376 |
| H06602 | 6 | 60 | 5 Periods  | 1 Overlap | 127849 | 125849.1 | 0.0106 |
| H06602 | 6 | 60 | 5 Periods  | 2 Overlap | 127209 | 126524   | 0.0053 |
| H06602 | 6 | 60 | 5 Periods  | 3 Overlap | 127563 | 124820.8 | 0.0187 |
| H06602 | 6 | 60 | 7 Periods  | 0 Overlap | 128888 | 123976.6 | 0.0253 |
| H06602 | 6 | 60 | 7 Periods  | 1 Overlap | 127743 | 126308.3 | 0.007  |
| H06602 | 6 | 60 | 7 Periods  | 2 Overlap | 127241 | 126719.1 | 0.0037 |
| H06602 | 6 | 60 | 7 Periods  | 3 Overlap | 127743 | 126974.2 | 0.0017 |

|        |   |    |            |           |        |          |        |
|--------|---|----|------------|-----------|--------|----------|--------|
| H06602 | 6 | 60 | 9 Periods  | 0 Overlap | 129316 | 124613   | 0.0203 |
| H06602 | 6 | 60 | 9 Periods  | 1 Overlap | 127523 | 126487.1 | 0.0056 |
| H06602 | 6 | 60 | 9 Periods  | 2 Overlap | 127196 | 126990.1 | 0.0016 |
| H06602 | 6 | 60 | 9 Periods  | 3 Overlap | 127196 | 125613.7 | 0.0124 |
| H06602 | 6 | 60 | 11 Periods | 0 Overlap | 128116 | 125091.1 | 0.0165 |
| H06602 | 6 | 60 | 11 Periods | 1 Overlap | 127241 | 126655.8 | 0.0042 |
| H06602 | 6 | 60 | 11 Periods | 2 Overlap | 127196 | 127041.9 | 0.0012 |
| H06602 | 6 | 60 | 11 Periods | 3 Overlap | 127196 | 127112   | 0.0007 |
| H06603 | 6 | 60 | 3 Periods  | 0 Overlap | 133181 | 122113.3 | 0.0536 |
| H06603 | 6 | 60 | 3 Periods  | 1 Overlap | 129632 | 125361.3 | 0.0284 |
| H06603 | 6 | 60 | 3 Periods  | 2 Overlap | 130019 | 126336.5 | 0.0208 |
| H06603 | 6 | 60 | 5 Periods  | 0 Overlap | 134460 | 124210.3 | 0.0373 |
| H06603 | 6 | 60 | 5 Periods  | 1 Overlap | 129878 | 126893.2 | 0.0165 |
| H06603 | 6 | 60 | 5 Periods  | 2 Overlap | 129263 | 127235.3 | 0.0139 |
| H06603 | 6 | 60 | 5 Periods  | 3 Overlap | 129197 | 127777   | 0.0097 |
| H06603 | 6 | 60 | 7 Periods  | 0 Overlap | 131559 | 125462.9 | 0.0276 |
| H06603 | 6 | 60 | 7 Periods  | 1 Overlap | 129545 | 127508.1 | 0.0118 |
| H06603 | 6 | 60 | 7 Periods  | 2 Overlap | 129029 | 127952.8 | 0.0083 |
| H06603 | 6 | 60 | 7 Periods  | 3 Overlap | 129442 | 128222.8 | 0.0062 |
| H06603 | 6 | 60 | 9 Periods  | 0 Overlap | 129967 | 126505.7 | 0.0195 |
| H06603 | 6 | 60 | 9 Periods  | 1 Overlap | 129397 | 127965.2 | 0.0082 |
| H06603 | 6 | 60 | 9 Periods  | 2 Overlap | 129497 | 128254.2 | 0.006  |
| H06603 | 6 | 60 | 9 Periods  | 3 Overlap | 129192 | 126498.4 | 0.0196 |
| H06603 | 6 | 60 | 11 Periods | 0 Overlap | 130486 | 127295   | 0.0134 |
| H06603 | 6 | 60 | 11 Periods | 1 Overlap | 129630 | 128388.8 | 0.0049 |
| H06603 | 6 | 60 | 11 Periods | 2 Overlap | 129026 | 128323.3 | 0.0054 |
| H06603 | 6 | 60 | 11 Periods | 3 Overlap | 129200 | 128654.7 | 0.0029 |
| H06604 | 6 | 60 | 3 Periods  | 0 Overlap | 174308 | 152425.7 | 0.0849 |
| H06604 | 6 | 60 | 3 Periods  | 1 Overlap | 170339 | 162451.9 | 0.0247 |
| H06604 | 6 | 60 | 3 Periods  | 2 Overlap | 168119 | 164433.9 | 0.0128 |
| H06604 | 6 | 60 | 5 Periods  | 0 Overlap | 193194 | 157869.8 | 0.0522 |

|        |    |    |            |           |          |          |        |
|--------|----|----|------------|-----------|----------|----------|--------|
| H06604 | 6  | 60 | 5 Periods  | 1 Overlap | 167005   | 164622.4 | 0.0117 |
| H06604 | 6  | 60 | 5 Periods  | 2 Overlap | 166801   | 165484.5 | 0.0065 |
| H06604 | 6  | 60 | 5 Periods  | 3 Overlap | 166653   | 163921.8 | 0.0159 |
| H06604 | 6  | 60 | 7 Periods  | 0 Overlap | 169463   | 159952.8 | 0.0397 |
| H06604 | 6  | 60 | 7 Periods  | 1 Overlap | 168110   | 165129.6 | 0.0086 |
| H06604 | 6  | 60 | 7 Periods  | 2 Overlap | 167869   | 165797   | 0.0046 |
| H06604 | 6  | 60 | 7 Periods  | 3 Overlap | 167325   | 166065.4 | 0.003  |
| H06604 | 6  | 60 | 9 Periods  | 0 Overlap | 193655   | 161888.7 | 0.0281 |
| H06604 | 6  | 60 | 9 Periods  | 1 Overlap | 167056   | 165609.3 | 0.0058 |
| H06604 | 6  | 60 | 9 Periods  | 2 Overlap | 167116   | 165981.5 | 0.0035 |
| H06604 | 6  | 60 | 9 Periods  | 3 Overlap | 166570   | 164077   | 0.015  |
| H06604 | 6  | 60 | 11 Periods | 0 Overlap | 168363   | 162767.3 | 0.0228 |
| H06604 | 6  | 60 | 11 Periods | 1 Overlap | 166962   | 165616.2 | 0.0057 |
| H06604 | 6  | 60 | 11 Periods | 2 Overlap | 166815   | 166203.2 | 0.0022 |
| H06604 | 6  | 60 | 11 Periods | 3 Overlap | 166619   | 166288.3 | 0.0017 |
| H10151 | 10 | 15 | 3 Periods  | 0 Overlap | 478623.2 | 423250.3 | 0.088  |
| H10151 | 10 | 15 | 3 Periods  | 1 Overlap | 467073.2 | 444647.8 | 0.0419 |
| H10151 | 10 | 15 | 3 Periods  | 2 Overlap | 464811.7 | 448141.1 | 0.0344 |
| H10151 | 10 | 15 | 5 Periods  | 0 Overlap | 483711.4 | 444992.4 | 0.0412 |
| H10151 | 10 | 15 | 5 Periods  | 1 Overlap | 465033.4 | 453937   | 0.0219 |
| H10151 | 10 | 15 | 5 Periods  | 2 Overlap | 467936.3 | 455172.1 | 0.0192 |
| H10151 | 10 | 15 | 5 Periods  | 3 Overlap | 464493.2 | 455995.4 | 0.0175 |
| H10151 | 10 | 15 | 7 Periods  | 0 Overlap | 468674   | 450339.8 | 0.0297 |
| H10151 | 10 | 15 | 7 Periods  | 1 Overlap | 465429.9 | 456137.6 | 0.0172 |
| H10151 | 10 | 15 | 7 Periods  | 2 Overlap | 464707.5 | 457989.7 | 0.0132 |
| H10151 | 10 | 15 | 7 Periods  | 3 Overlap | 468027.2 | 458814.7 | 0.0114 |
| H10151 | 10 | 15 | 9 Periods  | 0 Overlap | 465243.8 | 458039.4 | 0.0131 |
| H10151 | 10 | 15 | 9 Periods  | 1 Overlap | 464586.4 | 459931   | 0.009  |
| H10151 | 10 | 15 | 9 Periods  | 2 Overlap | 464355   | 460219.4 | 0.0084 |
| H10151 | 10 | 15 | 9 Periods  | 3 Overlap | 464355   | 460471.5 | 0.0078 |
| H10151 | 10 | 15 | 11 Periods | 0 Overlap | 464535.3 | 460078.4 | 0.0087 |

|        |    |    |            |           |          |          |        |
|--------|----|----|------------|-----------|----------|----------|--------|
| H10151 | 10 | 15 | 11 Periods | 1 Overlap | 464102.4 | 460911.5 | 0.0069 |
| H10151 | 10 | 15 | 11 Periods | 2 Overlap | 464586.4 | 461140.8 | 0.0064 |
| H10151 | 10 | 15 | 11 Periods | 3 Overlap | 464586.4 | 461149.3 | 0.0064 |
| H10152 | 10 | 15 | 3 Periods  | 0 Overlap | 197728.7 | 153752.6 | 0.1524 |
| H10152 | 10 | 15 | 3 Periods  | 1 Overlap | 183335.7 | 167483.1 | 0.0767 |
| H10152 | 10 | 15 | 3 Periods  | 2 Overlap | 186524.7 | 170025.1 | 0.0626 |
| H10152 | 10 | 15 | 5 Periods  | 0 Overlap | 197761.8 | 162990.7 | 0.1014 |
| H10152 | 10 | 15 | 5 Periods  | 1 Overlap | 190477   | 171053.1 | 0.057  |
| H10152 | 10 | 15 | 5 Periods  | 2 Overlap | 183921.9 | 173894.8 | 0.0413 |
| H10152 | 10 | 15 | 5 Periods  | 3 Overlap | 185354.4 | 174519   | 0.0379 |
| H10152 | 10 | 15 | 7 Periods  | 0 Overlap | 184533.6 | 171775.6 | 0.053  |
| H10152 | 10 | 15 | 7 Periods  | 1 Overlap | 183918.8 | 176736.6 | 0.0256 |
| H10152 | 10 | 15 | 7 Periods  | 2 Overlap | 183091.2 | 177535.5 | 0.0212 |
| H10152 | 10 | 15 | 7 Periods  | 3 Overlap | 189299.3 | 177883.5 | 0.0193 |
| H10152 | 10 | 15 | 9 Periods  | 0 Overlap | 191389.8 | 175719.5 | 0.0312 |
| H10152 | 10 | 15 | 9 Periods  | 1 Overlap | 192808.9 | 178658.2 | 0.015  |
| H10152 | 10 | 15 | 9 Periods  | 2 Overlap | 192277.4 | 179000   | 0.0132 |
| H10152 | 10 | 15 | 9 Periods  | 3 Overlap | 191664.6 | 179183.9 | 0.0121 |
| H10152 | 10 | 15 | 11 Periods | 0 Overlap | 182153.9 | 180391   | 0.0055 |
| H10152 | 10 | 15 | 11 Periods | 1 Overlap | 181387.1 | 181219.9 | 0.0009 |
| H10152 | 10 | 15 | 11 Periods | 2 Overlap | 181387.1 | 181227.6 | 0.0009 |
| H10152 | 10 | 15 | 11 Periods | 3 Overlap | 181387.1 | 181372.6 | 0.0001 |
| H10301 | 10 | 30 | 3 Periods  | 0 Overlap | 503199.6 | 413686.7 | 0.1546 |
| H10301 | 10 | 30 | 3 Periods  | 1 Overlap | 504245.6 | 450965.9 | 0.0785 |
| H10301 | 10 | 30 | 3 Periods  | 2 Overlap | 503663.7 | 449516.1 | 0.0814 |
| H10301 | 10 | 30 | 5 Periods  | 0 Overlap | 509255.7 | 438780.9 | 0.1034 |
| H10301 | 10 | 30 | 5 Periods  | 1 Overlap | 489356.5 | 466702.5 | 0.0463 |
| H10301 | 10 | 30 | 5 Periods  | 2 Overlap | 495222.3 | 468726.1 | 0.0422 |
| H10301 | 10 | 30 | 5 Periods  | 3 Overlap | 499595.2 | 448847.3 | 0.0828 |
| H10301 | 10 | 30 | 7 Periods  | 0 Overlap | 497443.8 | 458961.2 | 0.0621 |
| H10301 | 10 | 30 | 7 Periods  | 1 Overlap | 501216.3 | 470558.2 | 0.0384 |

|        |    |    |            |           |          |          |        |
|--------|----|----|------------|-----------|----------|----------|--------|
| H10301 | 10 | 30 | 7 Periods  | 2 Overlap | 497700.8 | 472096.8 | 0.0353 |
| H10301 | 10 | 30 | 7 Periods  | 3 Overlap | 495074.1 | 460269   | 0.0594 |
| H10301 | 10 | 30 | 9 Periods  | 0 Overlap | 517965.7 | 463653.3 | 0.0525 |
| H10301 | 10 | 30 | 9 Periods  | 1 Overlap | 492799.9 | 473570.7 | 0.0323 |
| H10301 | 10 | 30 | 9 Periods  | 2 Overlap | 491048.8 | 471737   | 0.036  |
| H10301 | 10 | 30 | 9 Periods  | 3 Overlap | 494634.5 | 469651.4 | 0.0403 |
| H10301 | 10 | 30 | 11 Periods | 0 Overlap | 494606.4 | 470100.2 | 0.0394 |
| H10301 | 10 | 30 | 11 Periods | 1 Overlap | 492699.1 | 476590   | 0.0261 |
| H10301 | 10 | 30 | 11 Periods | 2 Overlap | 496047.8 | 473551.8 | 0.0323 |
| H10301 | 10 | 30 | 11 Periods | 3 Overlap | 495816.7 | 466587.5 | 0.0465 |
| H10302 | 10 | 30 | 3 Periods  | 0 Overlap | 339672.4 | 270297.3 | 0.1694 |
| H10302 | 10 | 30 | 3 Periods  | 1 Overlap | 327050.3 | 296236.5 | 0.0897 |
| H10302 | 10 | 30 | 3 Periods  | 2 Overlap | 325441.2 | 287593.4 | 0.1163 |
| H10302 | 10 | 30 | 5 Periods  | 0 Overlap | 349486.3 | 292418.6 | 0.1015 |
| H10302 | 10 | 30 | 5 Periods  | 1 Overlap | 343699.1 | 303314.1 | 0.068  |
| H10302 | 10 | 30 | 5 Periods  | 2 Overlap | 330303.6 | 304860.7 | 0.0632 |
| H10302 | 10 | 30 | 5 Periods  | 3 Overlap | 337190   | 289517.2 | 0.1104 |
| H10302 | 10 | 30 | 7 Periods  | 0 Overlap | 342781   | 299464.4 | 0.0798 |
| H10302 | 10 | 30 | 7 Periods  | 1 Overlap | 326618.6 | 307947.4 | 0.0538 |
| H10302 | 10 | 30 | 7 Periods  | 2 Overlap | 328650.3 | 308974.1 | 0.0506 |
| H10302 | 10 | 30 | 7 Periods  | 3 Overlap | 326631.4 | 303246.7 | 0.0682 |
| H10302 | 10 | 30 | 9 Periods  | 0 Overlap | 375602.3 | 304603.2 | 0.064  |
| H10302 | 10 | 30 | 9 Periods  | 1 Overlap | 327475.2 | 310332.2 | 0.0464 |
| H10302 | 10 | 30 | 9 Periods  | 2 Overlap | 327054.6 | 310930   | 0.0446 |
| H10302 | 10 | 30 | 9 Periods  | 3 Overlap | 327538.2 | 306184.9 | 0.0592 |
| H10302 | 10 | 30 | 11 Periods | 0 Overlap | 328823.2 | 307754.3 | 0.0543 |
| H10302 | 10 | 30 | 11 Periods | 1 Overlap | 326766.6 | 310122.8 | 0.0471 |
| H10302 | 10 | 30 | 11 Periods | 2 Overlap | 326435.1 | 308910.7 | 0.0508 |
| H10302 | 10 | 30 | 11 Periods | 3 Overlap | 327423.4 | 301946.7 | 0.0722 |
| H10303 | 10 | 30 | 3 Periods  | 0 Overlap | 143566.2 | 112425.2 | 0.0656 |
| H10303 | 10 | 30 | 3 Periods  | 1 Overlap | 122066.9 | 118523.3 | 0.0149 |

|        |    |    |            |           |          |          |         |
|--------|----|----|------------|-----------|----------|----------|---------|
| H10303 | 10 | 30 | 3 Periods  | 2 Overlap | 121445.5 | 117819.3 | 0.0208  |
| H10303 | 10 | 30 | 5 Periods  | 0 Overlap | 180832.7 | 115580   | 0.0394  |
| H10303 | 10 | 30 | 5 Periods  | 1 Overlap | 122207.8 | 119676.4 | 0.0054  |
| H10303 | 10 | 30 | 5 Periods  | 2 Overlap | 120480.5 | 118540.8 | 0.0148  |
| H10303 | 10 | 30 | 5 Periods  | 3 Overlap | 120478.4 | 118004.8 | 0.0193  |
| H10303 | 10 | 30 | 7 Periods  | 0 Overlap | 122263.2 | 117332.8 | 0.0248  |
| H10303 | 10 | 30 | 7 Periods  | 1 Overlap | 120592.2 | 120042.4 | 0.0023  |
| H10303 | 10 | 30 | 7 Periods  | 2 Overlap | 120321.2 | 120258.9 | 0.0005  |
| H10303 | 10 | 30 | 7 Periods  | 3 Overlap | 120321.3 | 118516.2 | 0.015   |
| H10303 | 10 | 30 | 9 Periods  | 0 Overlap | 143712.2 | 117712.4 | 0.0217  |
| H10303 | 10 | 30 | 9 Periods  | 1 Overlap | 120610.7 | 120094.7 | 0.0019  |
| H10303 | 10 | 30 | 9 Periods  | 2 Overlap | 120321.2 | 120289.2 | 0.0003  |
| H10303 | 10 | 30 | 9 Periods  | 3 Overlap | 120321.2 | 117909.4 | 0.02    |
| H10303 | 10 | 30 | 11 Periods | 0 Overlap | 120885.5 | 118543.1 | 0.0148  |
| H10303 | 10 | 30 | 11 Periods | 1 Overlap | 120406.1 | 120201   | 0.001   |
| H10303 | 10 | 30 | 11 Periods | 2 Overlap | 120327.4 | 120327.4 | -0.0001 |
| H10303 | 10 | 30 | 11 Periods | 3 Overlap | 120321.3 | 118862.6 | 0.0121  |
| H10304 | 10 | 30 | 3 Periods  | 0 Overlap | 988012.9 | 768226.7 | 0.169   |
| H10304 | 10 | 30 | 3 Periods  | 1 Overlap | 966484.1 | 815451.7 | 0.1179  |
| H10304 | 10 | 30 | 5 Periods  | 0 Overlap | 1047604  | 837376.4 | 0.0942  |
| H10304 | 10 | 30 | 5 Periods  | 1 Overlap | 977564.8 | 874006.6 | 0.0545  |
| H10304 | 10 | 30 | 5 Periods  | 2 Overlap | 950982.4 | 888352   | 0.039   |
| H10304 | 10 | 30 | 5 Periods  | 3 Overlap | 947696.3 | 864531.4 | 0.0648  |
| H10304 | 10 | 30 | 7 Periods  | 0 Overlap | 952118.9 | 857365   | 0.0725  |
| H10304 | 10 | 30 | 7 Periods  | 1 Overlap | 955635.7 | 887362.3 | 0.0401  |
| H10304 | 10 | 30 | 7 Periods  | 2 Overlap | 924431.1 | 899099.9 | 0.0274  |
| H10304 | 10 | 30 | 7 Periods  | 3 Overlap | 951923   | 891297.8 | 0.0358  |
| H10304 | 10 | 30 | 9 Periods  | 0 Overlap | 974968.8 | 883637.2 | 0.0441  |
| H10304 | 10 | 30 | 9 Periods  | 1 Overlap | 1003128  | 899139.4 | 0.0274  |
| H10304 | 10 | 30 | 9 Periods  | 2 Overlap | 936916.7 | 892164.3 | 0.0349  |
| H10304 | 10 | 30 | 9 Periods  | 3 Overlap | 930781.3 | 894520.7 | 0.0324  |

|        |    |    |            |           |          |          |        |
|--------|----|----|------------|-----------|----------|----------|--------|
| H10304 | 10 | 30 | 11 Periods | 0 Overlap | 937025.5 | 888570.1 | 0.0388 |
| H10304 | 10 | 30 | 11 Periods | 1 Overlap | 932624.3 | 895924.8 | 0.0308 |
| H10304 | 10 | 30 | 11 Periods | 2 Overlap | 931727.5 | 879886.1 | 0.0482 |
| H10304 | 10 | 30 | 11 Periods | 3 Overlap | 937921.3 | 888088.7 | 0.0393 |
| H10601 | 10 | 60 | 3 Periods  | 0 Overlap | 746597.5 | 516695.6 | 0.2374 |
| H10601 | 10 | 60 | 3 Periods  | 1 Overlap | 713409.4 | 577454.8 | 0.1477 |
| H10601 | 10 | 60 | 5 Periods  | 0 Overlap | 1084102  | 569624   | 0.1593 |
| H10601 | 10 | 60 | 5 Periods  | 1 Overlap | 705431.5 | 617637.1 | 0.0884 |
| H10601 | 10 | 60 | 5 Periods  | 2 Overlap | 691983.4 | 607664.6 | 0.1032 |
| H10601 | 10 | 60 | 5 Periods  | 3 Overlap | 701569.4 | 544283.7 | 0.1967 |
| H10601 | 10 | 60 | 7 Periods  | 0 Overlap | 725456.5 | 600647.6 | 0.1135 |
| H10601 | 10 | 60 | 7 Periods  | 1 Overlap | 706461   | 630137.5 | 0.07   |
| H10601 | 10 | 60 | 7 Periods  | 2 Overlap | 689183   | 641583.7 | 0.0531 |
| H10601 | 10 | 60 | 7 Periods  | 3 Overlap | 698722.6 | 591861.8 | 0.1265 |
| H10601 | 10 | 60 | 9 Periods  | 0 Overlap | 1146837  | 613729.5 | 0.0942 |
| H10601 | 10 | 60 | 9 Periods  | 1 Overlap | 695118.4 | 627199.5 | 0.0743 |
| H10601 | 10 | 60 | 9 Periods  | 2 Overlap | 677563.1 | 620419.7 | 0.0843 |
| H10601 | 10 | 60 | 9 Periods  | 3 Overlap | 693212.7 | 604455.8 | 0.1079 |
| H10601 | 10 | 60 | 11 Periods | 0 Overlap | 693862.6 | 618525   | 0.0871 |
| H10601 | 10 | 60 | 11 Periods | 1 Overlap | 686385.5 | 622840.5 | 0.0808 |
| H10601 | 10 | 60 | 11 Periods | 2 Overlap | 690241.3 | 631533.7 | 0.0679 |
| H10601 | 10 | 60 | 11 Periods | 3 Overlap | 701588.1 | 604155.1 | 0.1083 |
| H10602 | 10 | 60 | 3 Periods  | 0 Overlap | 875969.8 | 627736.9 | 0.2218 |
| H10602 | 10 | 60 | 3 Periods  | 1 Overlap | 853015.3 | 679219.7 | 0.158  |
| H10602 | 10 | 60 | 5 Periods  | 0 Overlap | 1591907  | 684555.9 | 0.1514 |
| H10602 | 10 | 60 | 5 Periods  | 1 Overlap | 816407.9 | 723236.3 | 0.1035 |
| H10602 | 10 | 60 | 5 Periods  | 2 Overlap | 829610.2 | 713825.2 | 0.1151 |
| H10602 | 10 | 60 | 5 Periods  | 3 Overlap | 826729.5 | 654391.9 | 0.1888 |
| H10602 | 10 | 60 | 7 Periods  | 0 Overlap | 829834.3 | 699480.8 | 0.1329 |
| H10602 | 10 | 60 | 7 Periods  | 1 Overlap | 838487.8 | 738248.8 | 0.0848 |
| H10602 | 10 | 60 | 7 Periods  | 2 Overlap | 835460.3 | 741377.4 | 0.081  |

|        |    |    |            |           |          |          |        |
|--------|----|----|------------|-----------|----------|----------|--------|
| H10602 | 10 | 60 | 7 Periods  | 3 Overlap | 816889.5 | 698782.6 | 0.1338 |
| H10602 | 10 | 60 | 9 Periods  | 0 Overlap | 989271.4 | 717706.7 | 0.1103 |
| H10602 | 10 | 60 | 9 Periods  | 1 Overlap | 806713.3 | 726483.3 | 0.0994 |
| H10602 | 10 | 60 | 9 Periods  | 2 Overlap | 810062.3 | 725805.5 | 0.1003 |
| H10602 | 10 | 60 | 9 Periods  | 3 Overlap | 816408.1 | 706571.5 | 0.1241 |
| H10602 | 10 | 60 | 11 Periods | 0 Overlap | 824230.7 | 714035.7 | 0.1149 |
| H10602 | 10 | 60 | 11 Periods | 1 Overlap | 827478.4 | 718119.1 | 0.1098 |
| H10602 | 10 | 60 | 11 Periods | 2 Overlap | 809031.3 | 723083.9 | 0.1036 |
| H10602 | 10 | 60 | 11 Periods | 3 Overlap | 806693.9 | 716496.3 | 0.1118 |
| H10603 | 10 | 60 | 3 Periods  | 0 Overlap | 579869.5 | 491198.3 | 0.1179 |
| H10603 | 10 | 60 | 3 Periods  | 1 Overlap | 571093   | 526817.8 | 0.0539 |
| H10603 | 10 | 60 | 5 Periods  | 0 Overlap | 627133.8 | 517194.1 | 0.0712 |
| H10603 | 10 | 60 | 5 Periods  | 1 Overlap | 570681.8 | 536748   | 0.0361 |
| H10603 | 10 | 60 | 5 Periods  | 2 Overlap | 558258.1 | 525412.9 | 0.0564 |
| H10603 | 10 | 60 | 5 Periods  | 3 Overlap | 558258.1 | 493736.5 | 0.1133 |
| H10603 | 10 | 60 | 7 Periods  | 0 Overlap | 575180.6 | 529906.8 | 0.0483 |
| H10603 | 10 | 60 | 7 Periods  | 1 Overlap | 564512   | 543856.9 | 0.0233 |
| H10603 | 10 | 60 | 7 Periods  | 2 Overlap | 576928.3 | 544827   | 0.0215 |
| H10603 | 10 | 60 | 7 Periods  | 3 Overlap | 557470.5 | 521899.1 | 0.0627 |
| H10603 | 10 | 60 | 9 Periods  | 0 Overlap | 582059.2 | 534722.4 | 0.0397 |
| H10603 | 10 | 60 | 9 Periods  | 1 Overlap | 563895.6 | 541164   | 0.0281 |
| H10603 | 10 | 60 | 9 Periods  | 2 Overlap | 556945.7 | 530496.8 | 0.0473 |
| H10603 | 10 | 60 | 9 Periods  | 3 Overlap | 556824.7 | 526119.9 | 0.0551 |
| H10603 | 10 | 60 | 11 Periods | 0 Overlap | 561467.5 | 537444.9 | 0.0348 |
| H10603 | 10 | 60 | 11 Periods | 1 Overlap | 566981.4 | 536221.3 | 0.037  |
| H10603 | 10 | 60 | 11 Periods | 2 Overlap | 561919.9 | 530641.6 | 0.047  |
| H10603 | 10 | 60 | 11 Periods | 3 Overlap | 558102.5 | 527091   | 0.0534 |
| H10604 | 10 | 60 | 3 Periods  | 0 Overlap | 671796   | 559532.3 | 0.1025 |
| H10604 | 10 | 60 | 3 Periods  | 1 Overlap | 641977   | 591661.5 | 0.051  |
| H10604 | 10 | 60 | 5 Periods  | 0 Overlap | 703309.8 | 589582.2 | 0.0543 |
| H10604 | 10 | 60 | 5 Periods  | 1 Overlap | 644500.3 | 605126.3 | 0.0294 |

|         |    |    |            |           |          |          |        |
|---------|----|----|------------|-----------|----------|----------|--------|
| H10604  | 10 | 60 | 5 Periods  | 2 Overlap | 623461.1 | 588661.3 | 0.0558 |
| H10604  | 10 | 60 | 5 Periods  | 3 Overlap | 632322.1 | 560263.3 | 0.1014 |
| H10604  | 10 | 60 | 7 Periods  | 0 Overlap | 632556.4 | 598361.2 | 0.0403 |
| H10604  | 10 | 60 | 7 Periods  | 1 Overlap | 627294.7 | 612207.9 | 0.018  |
| H10604  | 10 | 60 | 7 Periods  | 2 Overlap | 649163.6 | 613004.9 | 0.0168 |
| H10604  | 10 | 60 | 7 Periods  | 3 Overlap | 632677.5 | 586408.4 | 0.0594 |
| H10604  | 10 | 60 | 9 Periods  | 0 Overlap | 718790.1 | 604190.7 | 0.0309 |
| H10604  | 10 | 60 | 9 Periods  | 1 Overlap | 637658.1 | 612144   | 0.0182 |
| H10604  | 10 | 60 | 9 Periods  | 2 Overlap | 637527.2 | 601887.3 | 0.0346 |
| H10604  | 10 | 60 | 9 Periods  | 3 Overlap | 633586.2 | 589072.4 | 0.0552 |
| H10604  | 10 | 60 | 11 Periods | 0 Overlap | 635487.5 | 610797.6 | 0.0203 |
| H10604  | 10 | 60 | 11 Periods | 1 Overlap | 636870.3 | 599565.3 | 0.0383 |
| H10604  | 10 | 60 | 11 Periods | 2 Overlap | 636870.3 | 599565.3 | 0.0383 |
| H10604  | 10 | 60 | 11 Periods | 3 Overlap | 633969.7 | 592622.5 | 0.0495 |
| H021503 | 2  | 15 | 3 Periods  | 0 Overlap | 12599.74 | 12580.69 | 0.0015 |
| H021504 | 2  | 15 | 3 Periods  | 0 Overlap | 1971.178 | 1618.366 | 0.179  |
| H021505 | 2  | 15 | 3 Periods  | 0 Overlap | 12575.63 | 10764.5  | 0.1009 |
| H021506 | 2  | 15 | 3 Periods  | 0 Overlap | 6809     | 6511.88  | 0.0436 |
| H021507 | 2  | 15 | 3 Periods  | 0 Overlap | 2958.24  | 2850.977 | 0.0363 |
| H021508 | 2  | 15 | 3 Periods  | 0 Overlap | 5513.9   | 4674.482 | 0.0793 |
| H021509 | 2  | 15 | 3 Periods  | 0 Overlap | 3489.6   | 3449.605 | 0.0115 |
| H021510 | 2  | 15 | 3 Periods  | 0 Overlap | 8098.613 | 6468.479 | 0.0893 |
| H061503 | 6  | 15 | 3 Periods  | 0 Overlap | 161449   | 149395.7 | 0.067  |
| H061504 | 6  | 15 | 3 Periods  | 0 Overlap | 366859   | 306975.9 | 0.1114 |
| H061505 | 6  | 15 | 3 Periods  | 0 Overlap | 85898.77 | 79558.28 | 0.0563 |
| H061506 | 6  | 15 | 3 Periods  | 0 Overlap | 365359.2 | 328718.4 | 0.0931 |
| H061507 | 6  | 15 | 3 Periods  | 0 Overlap | 140311.8 | 114558.2 | 0.1062 |
| H061508 | 6  | 15 | 3 Periods  | 0 Overlap | 96820.08 | 72596.31 | 0.1298 |
| H061509 | 6  | 15 | 3 Periods  | 0 Overlap | 314727.1 | 291158.1 | 0.0651 |
| H061510 | 6  | 15 | 3 Periods  | 0 Overlap | 410420   | 370715.2 | 0.0447 |
| H101503 | 10 | 15 | 3 Periods  | 0 Overlap | 414359.6 | 350487.4 | 0.0857 |

|         |    |    |           |           |          |          |        |
|---------|----|----|-----------|-----------|----------|----------|--------|
| H101504 | 10 | 15 | 3 Periods | 0 Overlap | 367611.3 | 305145.8 | 0.0386 |
| H101505 | 10 | 15 | 3 Periods | 0 Overlap | 519300.7 | 471973.7 | 0.0517 |
| H101506 | 10 | 15 | 3 Periods | 0 Overlap | 122787.6 | 111830.6 | 0.075  |
| H101507 | 10 | 15 | 3 Periods | 0 Overlap | 460243   | 418307   | 0.0665 |
| H101508 | 10 | 15 | 3 Periods | 0 Overlap | 241664   | 225144.4 | 0.0586 |
| H101509 | 10 | 15 | 3 Periods | 0 Overlap | 430815   | 372743.5 | 0.0453 |
| H101510 | 10 | 15 | 3 Periods | 0 Overlap | 326520.8 | 283558.6 | 0.073  |
| H023005 | 2  | 30 | 3 Periods | 0 Overlap | 12130.17 | 9908.291 | 0.1122 |
| H023006 | 2  | 30 | 3 Periods | 0 Overlap | 18111.03 | 16517.23 | 0.0681 |
| H023007 | 2  | 30 | 3 Periods | 0 Overlap | 2822.639 | 2130.656 | 0.1769 |
| H023008 | 2  | 30 | 3 Periods | 0 Overlap | 17895.25 | 15492.26 | 0.0957 |
| H023009 | 2  | 30 | 3 Periods | 0 Overlap | 4672.604 | 4432.924 | 0.0425 |
| H023010 | 2  | 30 | 3 Periods | 0 Overlap | 22534.21 | 22137.6  | 0.0126 |
| H063005 | 6  | 30 | 3 Periods | 0 Overlap | 220820.9 | 180495.2 | 0.0759 |
| H063006 | 6  | 30 | 3 Periods | 0 Overlap | 198098.3 | 110209.5 | 0.0653 |
| H063007 | 6  | 30 | 3 Periods | 0 Overlap | 176262.1 | 114361.1 | 0.0967 |
| H063008 | 6  | 30 | 3 Periods | 0 Overlap | 328078.9 | 259495.7 | 0.1583 |
| H063009 | 6  | 30 | 3 Periods | 0 Overlap | 139659.4 | 87999.42 | 0.0614 |
| H063010 | 6  | 30 | 3 Periods | 0 Overlap | 287116.8 | 230179.9 | 0.1444 |
| H103005 | 10 | 30 | 3 Periods | 0 Overlap | 721599   | 527987.9 | 0.1396 |
| H103006 | 10 | 30 | 3 Periods | 0 Overlap | 467517.2 | 410817.4 | 0.0497 |
| H103007 | 10 | 30 | 3 Periods | 0 Overlap | 644263   | 440350.4 | 0.122  |
| H103008 | 10 | 30 | 3 Periods | 0 Overlap | 388073.8 | 335864.8 | 0.0607 |
| H103009 | 10 | 30 | 3 Periods | 0 Overlap | 772716.5 | 655968.1 | 0.1078 |
| H103010 | 10 | 30 | 3 Periods | 0 Overlap | 573716.6 | 341228.5 | 0.1604 |
| H026005 | 2  | 60 | 3 Periods | 0 Overlap | 136692.5 | 132618   | 0.0298 |
| H026006 | 2  | 60 | 3 Periods | 0 Overlap | 113428.4 | 107443.8 | 0.0308 |
| H026007 | 2  | 60 | 3 Periods | 0 Overlap | 77015.14 | 69124.22 | 0.0838 |
| H026008 | 2  | 60 | 3 Periods | 0 Overlap | 193743.6 | 189516   | 0.014  |
| H026009 | 2  | 60 | 3 Periods | 0 Overlap | 44820.18 | 41637.85 | 0.0404 |
| H026010 | 2  | 60 | 3 Periods | 0 Overlap | 116989.4 | 108229.7 | 0.0691 |

|         |    |    |           |           |          |          |        |
|---------|----|----|-----------|-----------|----------|----------|--------|
| H066005 | 6  | 60 | 3 Periods | 0 Overlap | 512550.3 | 379668.6 | 0.1387 |
| H066006 | 6  | 60 | 3 Periods | 0 Overlap | 406343.8 | 235151.8 | 0.3163 |
| H066007 | 6  | 60 | 3 Periods | 0 Overlap | 477863.8 | 322317.2 | 0.2272 |
| H066008 | 6  | 60 | 3 Periods | 0 Overlap | 228028.6 | 191271.6 | 0.0853 |
| H066009 | 6  | 60 | 3 Periods | 0 Overlap | 433941.6 | 339635.9 | 0.1037 |
| H066010 | 6  | 60 | 3 Periods | 0 Overlap | 397118.3 | 319390.4 | 0.1223 |
| H106005 | 10 | 60 | 3 Periods | 0 Overlap | 1704150  | 618794.6 | 0.1233 |
| H106006 | 10 | 60 | 3 Periods | 0 Overlap | 652354.1 | 422375.8 | 0.0659 |
| H106007 | 10 | 60 | 3 Periods | 0 Overlap | 952913.5 | 485059.3 | 0.0943 |
| H106008 | 10 | 60 | 3 Periods | 0 Overlap | 1231989  | 586486.1 | 0.2302 |
| H106009 | 10 | 60 | 3 Periods | 0 Overlap | 845598.6 | 544411.9 | 0.1843 |
| H106010 | 10 | 60 | 3 Periods | 0 Overlap | 843894.4 | 532489.9 | 0.1087 |
| H021503 | 2  | 15 | 3 Periods | 1 Overlap | 12599.74 | 12578.9  | 0.0017 |
| H021504 | 2  | 15 | 3 Periods | 1 Overlap | 2442.471 | 1699.819 | 0.1377 |
| H021505 | 2  | 15 | 3 Periods | 1 Overlap | 12432.83 | 11140.52 | 0.0695 |
| H021506 | 2  | 15 | 3 Periods | 1 Overlap | 6809     | 6452.78  | 0.0523 |
| H021507 | 2  | 15 | 3 Periods | 1 Overlap | 2958.24  | 2958.24  | 0      |
| H021508 | 2  | 15 | 3 Periods | 1 Overlap | 5435.833 | 4802.472 | 0.0541 |
| H021509 | 2  | 15 | 3 Periods | 1 Overlap | 3489.6   | 3489.6   | 0      |
| H021510 | 2  | 15 | 3 Periods | 1 Overlap | 7785.697 | 6565.656 | 0.0757 |
| H061503 | 6  | 15 | 3 Periods | 1 Overlap | 160126.3 | 152259.1 | 0.0491 |
| H061504 | 6  | 15 | 3 Periods | 1 Overlap | 359917.4 | 322006   | 0.0679 |
| H061505 | 6  | 15 | 3 Periods | 1 Overlap | 90681.75 | 81391.68 | 0.0346 |
| H061506 | 6  | 15 | 3 Periods | 1 Overlap | 374383   | 339159   | 0.0643 |
| H061507 | 6  | 15 | 3 Periods | 1 Overlap | 139469.3 | 119007.7 | 0.0715 |
| H061508 | 6  | 15 | 3 Periods | 1 Overlap | 85469.63 | 74076.03 | 0.112  |
| H061509 | 6  | 15 | 3 Periods | 1 Overlap | 315148.2 | 296173   | 0.049  |
| H061510 | 6  | 15 | 3 Periods | 1 Overlap | 391611.7 | 376561.8 | 0.0297 |
| H101503 | 10 | 15 | 3 Periods | 1 Overlap | 383707.9 | 367919.2 | 0.0402 |
| H101504 | 10 | 15 | 3 Periods | 1 Overlap | 324680.1 | 309730.4 | 0.0241 |
| H101505 | 10 | 15 | 3 Periods | 1 Overlap | 499416.4 | 476703.9 | 0.0422 |

|         |    |    |           |           |          |          |        |
|---------|----|----|-----------|-----------|----------|----------|--------|
| H101506 | 10 | 15 | 3 Periods | 1 Overlap | 122299.7 | 112806.9 | 0.0669 |
| H101507 | 10 | 15 | 3 Periods | 1 Overlap | 448114.3 | 425421.7 | 0.0506 |
| H101508 | 10 | 15 | 3 Periods | 1 Overlap | 240022.2 | 228229   | 0.0457 |
| H101509 | 10 | 15 | 3 Periods | 1 Overlap | 398846.1 | 382885.8 | 0.0194 |
| H101510 | 10 | 15 | 3 Periods | 1 Overlap | 308240.9 | 290047.1 | 0.0518 |
| H023005 | 2  | 30 | 3 Periods | 1 Overlap | 11170.11 | 10381.46 | 0.0698 |
| H023006 | 2  | 30 | 3 Periods | 1 Overlap | 18478.72 | 16277.35 | 0.0817 |
| H023007 | 2  | 30 | 3 Periods | 1 Overlap | 2588.446 | 2172.623 | 0.1606 |
| H023008 | 2  | 30 | 3 Periods | 1 Overlap | 17569.36 | 15614.37 | 0.0886 |
| H023009 | 2  | 30 | 3 Periods | 1 Overlap | 4672.604 | 4475.132 | 0.0334 |
| H023010 | 2  | 30 | 3 Periods | 1 Overlap | 22420.28 | 22140.86 | 0.0125 |
| H063005 | 6  | 30 | 3 Periods | 1 Overlap | 196633.9 | 185029   | 0.0527 |
| H063006 | 6  | 30 | 3 Periods | 1 Overlap | 118960.3 | 113773.3 | 0.0351 |
| H063007 | 6  | 30 | 3 Periods | 1 Overlap | 129646.8 | 118047.8 | 0.0675 |
| H063008 | 6  | 30 | 3 Periods | 1 Overlap | 313785.4 | 277271.1 | 0.1006 |
| H063009 | 6  | 30 | 3 Periods | 1 Overlap | 96784.17 | 91901.86 | 0.0198 |
| H063010 | 6  | 30 | 3 Periods | 1 Overlap | 278268.2 | 244287.1 | 0.092  |
| H103005 | 10 | 30 | 3 Periods | 1 Overlap | 896291.8 | 545695.7 | 0.1107 |
| H103006 | 10 | 30 | 3 Periods | 1 Overlap | 435371.1 | 413791.3 | 0.0428 |
| H103007 | 10 | 30 | 3 Periods | 1 Overlap | 523144.3 | 457013.6 | 0.0888 |
| H103008 | 10 | 30 | 3 Periods | 1 Overlap | 357562.6 | 341550.8 | 0.0448 |
| H103009 | 10 | 30 | 3 Periods | 1 Overlap | 743536.3 | 672848.3 | 0.0848 |
| H103010 | 10 | 30 | 3 Periods | 1 Overlap | 437789.3 | 362305.7 | 0.1085 |
| H026005 | 2  | 60 | 3 Periods | 1 Overlap | 137281.1 | 132827   | 0.0283 |
| H026006 | 2  | 60 | 3 Periods | 1 Overlap | 112338.1 | 107687.1 | 0.0286 |
| H026007 | 2  | 60 | 3 Periods | 1 Overlap | 76287.08 | 71317.68 | 0.0547 |
| H026008 | 2  | 60 | 3 Periods | 1 Overlap | 193119.9 | 189655.2 | 0.0133 |
| H026009 | 2  | 60 | 3 Periods | 1 Overlap | 44750.35 | 41862.39 | 0.0352 |
| H026010 | 2  | 60 | 3 Periods | 1 Overlap | 117710.9 | 112197.9 | 0.035  |
| H066005 | 6  | 60 | 3 Periods | 1 Overlap | 453463.1 | 396283.1 | 0.101  |
| H066006 | 6  | 60 | 3 Periods | 1 Overlap | 369527.7 | 248499.9 | 0.2775 |

|         |    |    |           |           |          |          |        |
|---------|----|----|-----------|-----------|----------|----------|--------|
| H066007 | 6  | 60 | 3 Periods | 1 Overlap | 467078.7 | 344419.9 | 0.1742 |
| H066008 | 6  | 60 | 3 Periods | 1 Overlap | 474410.3 | 199577.5 | 0.0455 |
| H066009 | 6  | 60 | 3 Periods | 1 Overlap | 398624.8 | 347765.3 | 0.0823 |
| H066010 | 6  | 60 | 3 Periods | 1 Overlap | 382448.1 | 327178.1 | 0.1009 |
| H106005 | 10 | 60 | 3 Periods | 1 Overlap | 732243.3 | 613953.2 | 0.1302 |
| H106006 | 10 | 60 | 3 Periods | 1 Overlap | 452180.5 | 407751.7 | 0.0983 |
| H106007 | 10 | 60 | 3 Periods | 1 Overlap | 544198.9 | 480163.6 | 0.1034 |
| H106008 | 10 | 60 | 3 Periods | 1 Overlap | 812382.1 | 582641   | 0.2353 |
| H106009 | 10 | 60 | 3 Periods | 1 Overlap | 675274.4 | 545754.6 | 0.1823 |
| H106010 | 10 | 60 | 3 Periods | 1 Overlap | 605429.9 | 518580.3 | 0.1319 |
| H021503 | 2  | 15 | 3 Periods | 2 Overlap | 12599.74 | 12587.01 | 0.001  |
| H021504 | 2  | 15 | 3 Periods | 2 Overlap | 1971.178 | 1820.054 | 0.0767 |
| H021505 | 2  | 15 | 3 Periods | 2 Overlap | 13849.66 | 11380.25 | 0.0495 |
| H021506 | 2  | 15 | 3 Periods | 2 Overlap | 6809     | 6549.118 | 0.0382 |
| H021507 | 2  | 15 | 3 Periods | 2 Overlap | 2958.24  | 2958.24  | 0      |
| H021508 | 2  | 15 | 3 Periods | 2 Overlap | 5588.967 | 4931.606 | 0.0287 |
| H021509 | 2  | 15 | 3 Periods | 2 Overlap | 3489.6   | 3489.6   | 0      |
| H021510 | 2  | 15 | 3 Periods | 2 Overlap | 7103.005 | 6710.533 | 0.0553 |
| H061503 | 6  | 15 | 3 Periods | 2 Overlap | 161160.9 | 150638.7 | 0.0593 |
| H061504 | 6  | 15 | 3 Periods | 2 Overlap | 353377.4 | 318117.8 | 0.0792 |
| H061505 | 6  | 15 | 3 Periods | 2 Overlap | 90916.45 | 81561.65 | 0.0325 |
| H061506 | 6  | 15 | 3 Periods | 2 Overlap | 362588.7 | 331966.7 | 0.0841 |
| H061507 | 6  | 15 | 3 Periods | 2 Overlap | 140732.9 | 119557.6 | 0.0672 |
| H061508 | 6  | 15 | 3 Periods | 2 Overlap | 83420.32 | 73755.11 | 0.1159 |
| H061509 | 6  | 15 | 3 Periods | 2 Overlap | 311824.5 | 290490.5 | 0.0672 |
| H061510 | 6  | 15 | 3 Periods | 2 Overlap | 403625.5 | 368001   | 0.0517 |
| H101503 | 10 | 15 | 3 Periods | 2 Overlap | 387495.1 | 325590.9 | 0.1506 |
| H101504 | 10 | 15 | 3 Periods | 2 Overlap | 317761.7 | 272396.8 | 0.1417 |
| H101505 | 10 | 15 | 3 Periods | 2 Overlap | 498674.1 | 429057.4 | 0.1379 |
| H101506 | 10 | 15 | 3 Periods | 2 Overlap | 120895.1 | 89926.11 | 0.2562 |
| H101507 | 10 | 15 | 3 Periods | 2 Overlap | 457164.8 | 358799.6 | 0.1993 |

|         |    |    |           |           |          |          |        |
|---------|----|----|-----------|-----------|----------|----------|--------|
| H101508 | 10 | 15 | 3 Periods | 2 Overlap | 239161.3 | 186807.7 | 0.2189 |
| H101509 | 10 | 15 | 3 Periods | 2 Overlap | 394168.3 | 341332.9 | 0.1258 |
| H101510 | 10 | 15 | 3 Periods | 2 Overlap | 315693.1 | 235624.2 | 0.2297 |
| H023005 | 2  | 30 | 3 Periods | 2 Overlap | 11170.11 | 10573.07 | 0.0526 |
| H023006 | 2  | 30 | 3 Periods | 2 Overlap | 18474.9  | 16578.91 | 0.0647 |
| H023007 | 2  | 30 | 3 Periods | 2 Overlap | 2841.463 | 2260.653 | 0.1266 |
| H023008 | 2  | 30 | 3 Periods | 2 Overlap | 17564.59 | 15791.62 | 0.0783 |
| H023009 | 2  | 30 | 3 Periods | 2 Overlap | 4672.604 | 4476.577 | 0.0331 |
| H023010 | 2  | 30 | 3 Periods | 2 Overlap | 22420.28 | 22142.38 | 0.0124 |
| H063005 | 6  | 30 | 3 Periods | 2 Overlap | 195745.6 | 175207.6 | 0.103  |
| H063006 | 6  | 30 | 3 Periods | 2 Overlap | 118436.8 | 109567.4 | 0.0708 |
| H063007 | 6  | 30 | 3 Periods | 2 Overlap | 127295.6 | 115502.8 | 0.0877 |
| H063008 | 6  | 30 | 3 Periods | 2 Overlap | 316692.4 | 258693   | 0.1609 |
| H063009 | 6  | 30 | 3 Periods | 2 Overlap | 93757.58 | 81119.62 | 0.1348 |
| H063010 | 6  | 30 | 3 Periods | 2 Overlap | 271757.6 | 226440.5 | 0.1583 |
| H103005 | 10 | 30 | 3 Periods | 2 Overlap | 1527751  | 310903.2 | 0.4933 |
| H103006 | 10 | 30 | 3 Periods | 2 Overlap | 780020.2 | 268314.5 | 0.3794 |
| H103007 | 10 | 30 | 3 Periods | 2 Overlap | 519366.5 | 195988.2 | 0.6092 |
| H103008 | 10 | 30 | 3 Periods | 2 Overlap | 1268710  | 181512.7 | 0.4924 |
| H103009 | 10 | 30 | 3 Periods | 2 Overlap | 736673.4 | 328051.4 | 0.5538 |
| H103010 | 10 | 30 | 3 Periods | 2 Overlap | 420119.5 | 189417.1 | 0.5339 |
| H026005 | 2  | 60 | 3 Periods | 2 Overlap | 136692.5 | 132968.7 | 0.0272 |
| H026006 | 2  | 60 | 3 Periods | 2 Overlap | 113564.8 | 107817.6 | 0.0274 |
| H026007 | 2  | 60 | 3 Periods | 2 Overlap | 75781.79 | 72394.75 | 0.0404 |
| H026008 | 2  | 60 | 3 Periods | 2 Overlap | 193135.6 | 189760.2 | 0.0127 |
| H026009 | 2  | 60 | 3 Periods | 2 Overlap | 44337.77 | 42112.71 | 0.0295 |
| H026010 | 2  | 60 | 3 Periods | 2 Overlap | 116269.4 | 112448   | 0.0329 |
| H066005 | 6  | 60 | 3 Periods | 2 Overlap | 460838.7 | 250176.7 | 0.4324 |
| H066006 | 6  | 60 | 3 Periods | 2 Overlap | 378808   | 125882.2 | 0.634  |
| H066007 | 6  | 60 | 3 Periods | 2 Overlap | 471896.9 | 201516.4 | 0.5168 |
| H066008 | 6  | 60 | 3 Periods | 2 Overlap | 1090095  | 122712.6 | 0.4131 |

|         |    |    |           |           |          |          |        |
|---------|----|----|-----------|-----------|----------|----------|--------|
| H066009 | 6  | 60 | 3 Periods | 2 Overlap | 2074623  | 215306.5 | 0.4318 |
| H066010 | 6  | 60 | 3 Periods | 2 Overlap | 1641979  | 173638.9 | 0.5228 |
| H106005 | 10 | 60 | 3 Periods | 2 Overlap | 3688099  | 297097.5 | 0.5791 |
| H106006 | 10 | 60 | 3 Periods | 2 Overlap | 1764741  | 252243.5 | 0.4422 |
| H106007 | 10 | 60 | 3 Periods | 2 Overlap | 1413544  | 281963.1 | 0.4735 |
| H106008 | 10 | 60 | 3 Periods | 2 Overlap | 2542830  | 249791.6 | 0.6721 |
| H106009 | 10 | 60 | 3 Periods | 2 Overlap | 2708732  | 285792.5 | 0.5718 |
| H106010 | 10 | 60 | 3 Periods | 2 Overlap | 2313667  | 282776.6 | 0.5267 |
| H021503 | 2  | 15 | 5 Periods | 0 Overlap | 12599.74 | 12592.19 | 0.0006 |
| H021504 | 2  | 15 | 5 Periods | 0 Overlap | 1971.178 | 1854.057 | 0.0594 |
| H021505 | 2  | 15 | 5 Periods | 0 Overlap | 12010.89 | 11574.53 | 0.0333 |
| H021506 | 2  | 15 | 5 Periods | 0 Overlap | 7379.9   | 6539.417 | 0.0396 |
| H021507 | 2  | 15 | 5 Periods | 0 Overlap | 2958.24  | 2784.749 | 0.0586 |
| H021508 | 2  | 15 | 5 Periods | 0 Overlap | 5435.833 | 4979.191 | 0.0193 |
| H021509 | 2  | 15 | 5 Periods | 0 Overlap | 3489.6   | 3446.266 | 0.0124 |
| H021510 | 2  | 15 | 5 Periods | 0 Overlap | 7103.005 | 7049.595 | 0.0075 |
| H061503 | 6  | 15 | 5 Periods | 0 Overlap | 160539.4 | 155357.3 | 0.0298 |
| H061504 | 6  | 15 | 5 Periods | 0 Overlap | 360129.3 | 326440.8 | 0.0551 |
| H061505 | 6  | 15 | 5 Periods | 0 Overlap | 91306.09 | 81601.35 | 0.0321 |
| H061506 | 6  | 15 | 5 Periods | 0 Overlap | 371847.7 | 341273   | 0.0584 |
| H061507 | 6  | 15 | 5 Periods | 0 Overlap | 129217.8 | 124274.6 | 0.0304 |
| H061508 | 6  | 15 | 5 Periods | 0 Overlap | 102853.9 | 74534.63 | 0.1065 |
| H061509 | 6  | 15 | 5 Periods | 0 Overlap | 312943.5 | 292549.6 | 0.0606 |
| H061510 | 6  | 15 | 5 Periods | 0 Overlap | 398993.7 | 380334.9 | 0.0199 |
| H101503 | 10 | 15 | 5 Periods | 0 Overlap | 389018   | 364457.9 | 0.0492 |
| H101504 | 10 | 15 | 5 Periods | 0 Overlap | 334139.3 | 310402.7 | 0.022  |
| H101505 | 10 | 15 | 5 Periods | 0 Overlap | 510698.6 | 480507.9 | 0.0345 |
| H101506 | 10 | 15 | 5 Periods | 0 Overlap | 122481.7 | 114810.3 | 0.0503 |
| H101507 | 10 | 15 | 5 Periods | 0 Overlap | 496306.1 | 426659.8 | 0.0479 |
| H101508 | 10 | 15 | 5 Periods | 0 Overlap | 256774.7 | 229396.5 | 0.0408 |
| H101509 | 10 | 15 | 5 Periods | 0 Overlap | 426518.4 | 377654.1 | 0.0328 |

|         |    |    |           |           |          |          |        |
|---------|----|----|-----------|-----------|----------|----------|--------|
| H101510 | 10 | 15 | 5 Periods | 0 Overlap | 319693.1 | 291732.5 | 0.0463 |
| H023005 | 2  | 30 | 5 Periods | 0 Overlap | 11745.94 | 10404.22 | 0.0677 |
| H023006 | 2  | 30 | 5 Periods | 0 Overlap | 17933.19 | 16757.23 | 0.0546 |
| H023007 | 2  | 30 | 5 Periods | 0 Overlap | 2633.183 | 2279.79  | 0.1192 |
| H023008 | 2  | 30 | 5 Periods | 0 Overlap | 17836.69 | 15903.16 | 0.0717 |
| H023009 | 2  | 30 | 5 Periods | 0 Overlap | 4672.604 | 4507.238 | 0.0265 |
| H023010 | 2  | 30 | 5 Periods | 0 Overlap | 22715.55 | 22145.71 | 0.0122 |
| H063005 | 6  | 30 | 5 Periods | 0 Overlap | 205238.3 | 189056.6 | 0.0321 |
| H063006 | 6  | 30 | 5 Periods | 0 Overlap | 141244   | 113942.3 | 0.0337 |
| H063007 | 6  | 30 | 5 Periods | 0 Overlap | 128377.6 | 123673.5 | 0.0231 |
| H063008 | 6  | 30 | 5 Periods | 0 Overlap | 336399.9 | 279626.7 | 0.093  |
| H063009 | 6  | 30 | 5 Periods | 0 Overlap | 110310.2 | 91411.69 | 0.025  |
| H063010 | 6  | 30 | 5 Periods | 0 Overlap | 290598.8 | 246728.1 | 0.0829 |
| H103005 | 10 | 30 | 5 Periods | 0 Overlap | 654238.5 | 540118   | 0.1198 |
| H103006 | 10 | 30 | 5 Periods | 0 Overlap | 444407.2 | 417600.1 | 0.034  |
| H103007 | 10 | 30 | 5 Periods | 0 Overlap | 540776.3 | 456064.6 | 0.0907 |
| H103008 | 10 | 30 | 5 Periods | 0 Overlap | 362141.2 | 345684.6 | 0.0332 |
| H103009 | 10 | 30 | 5 Periods | 0 Overlap | 769223.5 | 684841.5 | 0.0685 |
| H103010 | 10 | 30 | 5 Periods | 0 Overlap | 427555.6 | 356665.2 | 0.1224 |
| H026005 | 2  | 60 | 5 Periods | 0 Overlap | 137840.4 | 133179.8 | 0.0257 |
| H026006 | 2  | 60 | 5 Periods | 0 Overlap | 114311.9 | 107700.9 | 0.0285 |
| H026007 | 2  | 60 | 5 Periods | 0 Overlap | 75781.79 | 71402.59 | 0.0536 |
| H026008 | 2  | 60 | 5 Periods | 0 Overlap | 192208.3 | 189834.8 | 0.0123 |
| H026009 | 2  | 60 | 5 Periods | 0 Overlap | 44942.65 | 42295.09 | 0.0253 |
| H026010 | 2  | 60 | 5 Periods | 0 Overlap | 117138.1 | 114091.1 | 0.0187 |
| H066005 | 6  | 60 | 5 Periods | 0 Overlap | 446094.8 | 396459.6 | 0.1006 |
| H066006 | 6  | 60 | 5 Periods | 0 Overlap | 360957.1 | 260218.4 | 0.2434 |
| H066007 | 6  | 60 | 5 Periods | 0 Overlap | 448128.8 | 342787   | 0.1781 |
| H066008 | 6  | 60 | 5 Periods | 0 Overlap | 229421.1 | 198406.4 | 0.0511 |
| H066009 | 6  | 60 | 5 Periods | 0 Overlap | 390583.3 | 356018.8 | 0.0605 |
| H066010 | 6  | 60 | 5 Periods | 0 Overlap | 383876   | 336355.8 | 0.0757 |

|         |    |    |           |           |          |          |        |
|---------|----|----|-----------|-----------|----------|----------|--------|
| H106005 | 10 | 60 | 5 Periods | 0 Overlap | 803548.4 | 642122.3 | 0.0903 |
| H106006 | 10 | 60 | 5 Periods | 0 Overlap | 626241.2 | 422822.4 | 0.0649 |
| H106007 | 10 | 60 | 5 Periods | 0 Overlap | 663561.5 | 493857.1 | 0.0779 |
| H106008 | 10 | 60 | 5 Periods | 0 Overlap | 1068370  | 613198.7 | 0.1951 |
| H106009 | 10 | 60 | 5 Periods | 0 Overlap | 858903.4 | 561314   | 0.1589 |
| H106010 | 10 | 60 | 5 Periods | 0 Overlap | 636980.2 | 537259.2 | 0.1007 |
| H021503 | 2  | 15 | 7 Periods | 0 Overlap | 12599.74 | 12597.86 | 0.0001 |
| H021504 | 2  | 15 | 7 Periods | 0 Overlap | 2015.159 | 1849.228 | 0.0619 |
| H021505 | 2  | 15 | 7 Periods | 0 Overlap | 12471.54 | 11475.77 | 0.0415 |
| H021506 | 2  | 15 | 7 Periods | 0 Overlap | 7339.5   | 6750.003 | 0.0087 |
| H021507 | 2  | 15 | 7 Periods | 0 Overlap | 2964.6   | 2916.207 | 0.0142 |
| H021508 | 2  | 15 | 7 Periods | 0 Overlap | 5513.9   | 4996.141 | 0.016  |
| H021509 | 2  | 15 | 7 Periods | 0 Overlap | 3504.2   | 3455.143 | 0.0099 |
| H021510 | 2  | 15 | 7 Periods | 0 Overlap | 7103.005 | 6981.917 | 0.017  |
| H061503 | 6  | 15 | 7 Periods | 0 Overlap | 162544.8 | 155905.2 | 0.0264 |
| H061504 | 6  | 15 | 7 Periods | 0 Overlap | 349970   | 335622.9 | 0.0285 |
| H061505 | 6  | 15 | 7 Periods | 0 Overlap | 107659.5 | 83978.71 | 0.0039 |
| H061506 | 6  | 15 | 7 Periods | 0 Overlap | 363106.4 | 347229.6 | 0.042  |
| H061507 | 6  | 15 | 7 Periods | 0 Overlap | 128173.1 | 125449   | 0.0213 |
| H061508 | 6  | 15 | 7 Periods | 0 Overlap | 90428.12 | 77117.58 | 0.0756 |
| H061509 | 6  | 15 | 7 Periods | 0 Overlap | 316730.2 | 300149.8 | 0.0362 |
| H061510 | 6  | 15 | 7 Periods | 0 Overlap | 406413   | 385243.1 | 0.0073 |
| H101503 | 10 | 15 | 7 Periods | 0 Overlap | 392060.9 | 364398.5 | 0.0494 |
| H101504 | 10 | 15 | 7 Periods | 0 Overlap | 320402.9 | 312932.4 | 0.014  |
| H101505 | 10 | 15 | 7 Periods | 0 Overlap | 510440.8 | 492152.4 | 0.0111 |
| H101506 | 10 | 15 | 7 Periods | 0 Overlap | 121105.3 | 117687.1 | 0.0265 |
| H101507 | 10 | 15 | 7 Periods | 0 Overlap | 459718.6 | 431462.4 | 0.0372 |
| H101508 | 10 | 15 | 7 Periods | 0 Overlap | 239622.8 | 234406.4 | 0.0199 |
| H101509 | 10 | 15 | 7 Periods | 0 Overlap | 391314.9 | 386481.5 | 0.0101 |
| H101510 | 10 | 15 | 7 Periods | 0 Overlap | 320670.4 | 294715   | 0.0366 |
| H023005 | 2  | 30 | 7 Periods | 0 Overlap | 11159.96 | 10366.55 | 0.0711 |

|         |    |    |           |           |          |          |        |
|---------|----|----|-----------|-----------|----------|----------|--------|
| H023006 | 2  | 30 | 7 Periods | 0 Overlap | 18305.39 | 16684.83 | 0.0587 |
| H023007 | 2  | 30 | 7 Periods | 0 Overlap | 2673.108 | 2346.466 | 0.0935 |
| H023008 | 2  | 30 | 7 Periods | 0 Overlap | 17517.74 | 16057.06 | 0.0628 |
| H023009 | 2  | 30 | 7 Periods | 0 Overlap | 4629.885 | 4497.856 | 0.0285 |
| H023010 | 2  | 30 | 7 Periods | 0 Overlap | 22568.52 | 22146.83 | 0.0122 |
| H063005 | 6  | 30 | 7 Periods | 0 Overlap | 195750.3 | 193558.3 | 0.009  |
| H063006 | 6  | 30 | 7 Periods | 0 Overlap | 125023.8 | 115673.4 | 0.019  |
| H063007 | 6  | 30 | 7 Periods | 0 Overlap | 127997.8 | 124023.1 | 0.0204 |
| H063008 | 6  | 30 | 7 Periods | 0 Overlap | 316386.2 | 288254   | 0.065  |
| H063009 | 6  | 30 | 7 Periods | 0 Overlap | 96214.97 | 92597.02 | 0.0124 |
| H063010 | 6  | 30 | 7 Periods | 0 Overlap | 283959.8 | 249581.9 | 0.0723 |
| H103005 | 10 | 30 | 7 Periods | 0 Overlap | 699673.8 | 551001.6 | 0.102  |
| H103006 | 10 | 30 | 7 Periods | 0 Overlap | 432642.7 | 418757.6 | 0.0314 |
| H103007 | 10 | 30 | 7 Periods | 0 Overlap | 543539.6 | 457276.5 | 0.0883 |
| H103008 | 10 | 30 | 7 Periods | 0 Overlap | 388381.9 | 345370.6 | 0.0341 |
| H103009 | 10 | 30 | 7 Periods | 0 Overlap | 742563.9 | 684222   | 0.0694 |
| H103010 | 10 | 30 | 7 Periods | 0 Overlap | 501723.1 | 361450.6 | 0.1106 |
| H026005 | 2  | 60 | 7 Periods | 0 Overlap | 137212.9 | 133266.4 | 0.0251 |
| H026006 | 2  | 60 | 7 Periods | 0 Overlap | 112983.4 | 108293.6 | 0.0231 |
| H026007 | 2  | 60 | 7 Periods | 0 Overlap | 76753.86 | 73315.06 | 0.0282 |
| H026008 | 2  | 60 | 7 Periods | 0 Overlap | 193287.6 | 189881.5 | 0.0121 |
| H026009 | 2  | 60 | 7 Periods | 0 Overlap | 43545.93 | 41630.74 | 0.0406 |
| H026010 | 2  | 60 | 7 Periods | 0 Overlap | 117587.7 | 114334.3 | 0.0166 |
| H066005 | 6  | 60 | 7 Periods | 0 Overlap | 444153.9 | 400205.9 | 0.0921 |
| H066006 | 6  | 60 | 7 Periods | 0 Overlap | 360875.4 | 265090.7 | 0.2292 |
| H066007 | 6  | 60 | 7 Periods | 0 Overlap | 448224.3 | 347911.5 | 0.1658 |
| H066008 | 6  | 60 | 7 Periods | 0 Overlap | 215809   | 201786.4 | 0.035  |
| H066009 | 6  | 60 | 7 Periods | 0 Overlap | 382389.4 | 345852.4 | 0.0873 |
| H066010 | 6  | 60 | 7 Periods | 0 Overlap | 376274.7 | 336751   | 0.0746 |
| H106005 | 10 | 60 | 7 Periods | 0 Overlap | 751639.2 | 638394.5 | 0.0956 |
| H106006 | 10 | 60 | 7 Periods | 0 Overlap | 516048.4 | 422841.7 | 0.0649 |

|         |    |    |           |           |          |          |        |
|---------|----|----|-----------|-----------|----------|----------|--------|
| H106007 | 10 | 60 | 7 Periods | 0 Overlap | 602446.1 | 507361.1 | 0.0527 |
| H106008 | 10 | 60 | 7 Periods | 0 Overlap | 828453.4 | 622132.5 | 0.1834 |
| H106009 | 10 | 60 | 7 Periods | 0 Overlap | 742012.8 | 575812.1 | 0.1372 |
| H106010 | 10 | 60 | 7 Periods | 0 Overlap | 626645.3 | 539687.8 | 0.0966 |
| H021503 | 2  | 15 | 9 Periods | 0 Overlap | 12599.74 | 12589.91 | 0.0008 |
| H021504 | 2  | 15 | 9 Periods | 0 Overlap | 1971.178 | 1947.643 | 0.0119 |
| H021505 | 2  | 15 | 9 Periods | 0 Overlap | 11972.81 | 11972.81 | 0      |
| H021506 | 2  | 15 | 9 Periods | 0 Overlap | 7517.5   | 6777.08  | 0.0047 |
| H021507 | 2  | 15 | 9 Periods | 0 Overlap | 2964.6   | 2906.819 | 0.0174 |
| H021508 | 2  | 15 | 9 Periods | 0 Overlap | 5360.767 | 5038.431 | 0.0077 |
| H021509 | 2  | 15 | 9 Periods | 0 Overlap | 3489.6   | 3486.892 | 0.0008 |
| H021510 | 2  | 15 | 9 Periods | 0 Overlap | 7103.005 | 6998.546 | 0.0147 |
| H061503 | 6  | 15 | 9 Periods | 0 Overlap | 161553.6 | 156715.7 | 0.0213 |
| H061504 | 6  | 15 | 9 Periods | 0 Overlap | 360470   | 338903.5 | 0.019  |
| H061505 | 6  | 15 | 9 Periods | 0 Overlap | 84393.46 | 83952.92 | 0.0042 |
| H061506 | 6  | 15 | 9 Periods | 0 Overlap | 367015.5 | 354631.1 | 0.0216 |
| H061507 | 6  | 15 | 9 Periods | 0 Overlap | 129089.8 | 126167.9 | 0.0156 |
| H061508 | 6  | 15 | 9 Periods | 0 Overlap | 85792    | 77852.59 | 0.0667 |
| H061509 | 6  | 15 | 9 Periods | 0 Overlap | 313757.4 | 303713.4 | 0.0248 |
| H061510 | 6  | 15 | 9 Periods | 0 Overlap | 388139.3 | 387440   | 0.0016 |
| H101503 | 10 | 15 | 9 Periods | 0 Overlap | 387525.1 | 368136.6 | 0.0396 |
| H101504 | 10 | 15 | 9 Periods | 0 Overlap | 317826.2 | 312972.5 | 0.0139 |
| H101505 | 10 | 15 | 9 Periods | 0 Overlap | 580757.6 | 490738.2 | 0.014  |
| H101506 | 10 | 15 | 9 Periods | 0 Overlap | 121876.5 | 119070.1 | 0.0151 |
| H101507 | 10 | 15 | 9 Periods | 0 Overlap | 460178.6 | 438532.9 | 0.0214 |
| H101508 | 10 | 15 | 9 Periods | 0 Overlap | 240279.6 | 235146.1 | 0.0168 |
| H101509 | 10 | 15 | 9 Periods | 0 Overlap | 391184.5 | 388127.9 | 0.0059 |
| H101510 | 10 | 15 | 9 Periods | 0 Overlap | 310953.8 | 295533.1 | 0.0339 |
| H023005 | 2  | 30 | 9 Periods | 0 Overlap | 11159.96 | 10977.03 | 0.0164 |
| H023006 | 2  | 30 | 9 Periods | 0 Overlap | 18506.67 | 16696.02 | 0.0581 |
| H023007 | 2  | 30 | 9 Periods | 0 Overlap | 2878.564 | 2343.892 | 0.0945 |

|         |    |    |           |           |          |          |        |
|---------|----|----|-----------|-----------|----------|----------|--------|
| H023008 | 2  | 30 | 9 Periods | 0 Overlap | 17554.76 | 15994.25 | 0.0664 |
| H023009 | 2  | 30 | 9 Periods | 0 Overlap | 4672.604 | 4564.884 | 0.014  |
| H023010 | 2  | 30 | 9 Periods | 0 Overlap | 22715.55 | 22146.17 | 0.0122 |
| H063005 | 6  | 30 | 9 Periods | 0 Overlap | 196021.9 | 193208.5 | 0.0108 |
| H063006 | 6  | 30 | 9 Periods | 0 Overlap | 141094   | 115513.1 | 0.0204 |
| H063007 | 6  | 30 | 9 Periods | 0 Overlap | 231725.3 | 124360.9 | 0.0177 |
| H063008 | 6  | 30 | 9 Periods | 0 Overlap | 324738.4 | 287396.6 | 0.0678 |
| H063009 | 6  | 30 | 9 Periods | 0 Overlap | 94798.62 | 92664.75 | 0.0117 |
| H063010 | 6  | 30 | 9 Periods | 0 Overlap | 275416.2 | 247048.3 | 0.0817 |
| H103005 | 10 | 30 | 9 Periods | 0 Overlap | 693118.5 | 556696.9 | 0.0928 |
| H103006 | 10 | 30 | 9 Periods | 0 Overlap | 437547   | 417868.5 | 0.0334 |
| H103007 | 10 | 30 | 9 Periods | 0 Overlap | 506539.6 | 462640.3 | 0.0776 |
| H103008 | 10 | 30 | 9 Periods | 0 Overlap | 357895.3 | 345864.4 | 0.0327 |
| H103009 | 10 | 30 | 9 Periods | 0 Overlap | 737166.3 | 689160   | 0.0627 |
| H103010 | 10 | 30 | 9 Periods | 0 Overlap | 440609.2 | 365650.6 | 0.1003 |
| H026005 | 2  | 60 | 9 Periods | 0 Overlap | 138725.4 | 133659.1 | 0.0222 |
| H026006 | 2  | 60 | 9 Periods | 0 Overlap | 114355.4 | 108294   | 0.0231 |
| H026007 | 2  | 60 | 9 Periods | 0 Overlap | 77689.92 | 73245.9  | 0.0291 |
| H026008 | 2  | 60 | 9 Periods | 0 Overlap | 193304   | 190127.3 | 0.0108 |
| H026009 | 2  | 60 | 9 Periods | 0 Overlap | 44305.5  | 42393.11 | 0.023  |
| H026010 | 2  | 60 | 9 Periods | 0 Overlap | 117310.3 | 114362.7 | 0.0164 |
| H066005 | 6  | 60 | 9 Periods | 0 Overlap | 444376.2 | 398679.3 | 0.0955 |
| H066006 | 6  | 60 | 9 Periods | 0 Overlap | 350696.4 | 263965.1 | 0.2325 |
| H066007 | 6  | 60 | 9 Periods | 0 Overlap | 459505.7 | 344337.8 | 0.1744 |
| H066008 | 6  | 60 | 9 Periods | 0 Overlap | 212523.1 | 202385.6 | 0.0321 |
| H066009 | 6  | 60 | 9 Periods | 0 Overlap | 384589.3 | 352299.4 | 0.0703 |
| H066010 | 6  | 60 | 9 Periods | 0 Overlap | 374019.7 | 337624.4 | 0.0722 |
| H106005 | 10 | 60 | 9 Periods | 0 Overlap | 740895.4 | 640941.7 | 0.0919 |
| H106006 | 10 | 60 | 9 Periods | 0 Overlap | 492466   | 424157.9 | 0.062  |
| H106007 | 10 | 60 | 9 Periods | 0 Overlap | 551473   | 507890.3 | 0.0517 |
| H106009 | 10 | 60 | 9 Periods | 0 Overlap | 700289.8 | 572502.3 | 0.1422 |

|         |    |    |            |           |          |          |        |
|---------|----|----|------------|-----------|----------|----------|--------|
| H106010 | 10 | 60 | 9 Periods  | 0 Overlap | 622100.7 | 543074.7 | 0.0909 |
| H021503 | 2  | 15 | 11 Periods | 0 Overlap | 12599.74 | 12593.42 | 0.0005 |
| H021504 | 2  | 15 | 11 Periods | 0 Overlap | 1971.178 | 1910.872 | 0.0306 |
| H021505 | 2  | 15 | 11 Periods | 0 Overlap | 11972.81 | 11912.64 | 0.005  |
| H021506 | 2  | 15 | 11 Periods | 0 Overlap | 6809     | 6608.781 | 0.0294 |
| H021507 | 2  | 15 | 11 Periods | 0 Overlap | 2964.6   | 2920.642 | 0.0127 |
| H021509 | 2  | 15 | 11 Periods | 0 Overlap | 3489.6   | 3454.884 | 0.0099 |
| H021510 | 2  | 15 | 11 Periods | 0 Overlap | 7103.005 | 6744.134 | 0.0505 |
| H061503 | 6  | 15 | 11 Periods | 0 Overlap | 161433.9 | 158527.3 | 0.01   |
| H061504 | 6  | 15 | 11 Periods | 0 Overlap | 350496.8 | 341705.5 | 0.0109 |
| H061505 | 6  | 15 | 11 Periods | 0 Overlap | 84427.81 | 83893.71 | 0.0049 |
| H061506 | 6  | 15 | 11 Periods | 0 Overlap | 363923.5 | 355190.2 | 0.02   |
| H061507 | 6  | 15 | 11 Periods | 0 Overlap | 128390.6 | 127176.9 | 0.0078 |
| H061508 | 6  | 15 | 11 Periods | 0 Overlap | 88811.76 | 79724.45 | 0.0443 |
| H061509 | 6  | 15 | 11 Periods | 0 Overlap | 315832.7 | 306558.7 | 0.0156 |
| H061510 | 6  | 15 | 11 Periods | 0 Overlap | 408607.6 | 387568.3 | 0.0013 |
| H101503 | 10 | 15 | 11 Periods | 0 Overlap | 386823   | 368365.5 | 0.039  |
| H101504 | 10 | 15 | 11 Periods | 0 Overlap | 318214.6 | 312941   | 0.014  |
| H101505 | 10 | 15 | 11 Periods | 0 Overlap | 499102.2 | 484494.9 | 0.0265 |
| H101506 | 10 | 15 | 11 Periods | 0 Overlap | 121144.1 | 119883.1 | 0.0084 |
| H101507 | 10 | 15 | 11 Periods | 0 Overlap | 456234.4 | 436662.5 | 0.0256 |
| H101508 | 10 | 15 | 11 Periods | 0 Overlap | 240096   | 235605.8 | 0.0149 |
| H101509 | 10 | 15 | 11 Periods | 0 Overlap | 391040.9 | 387159.7 | 0.0084 |
| H101510 | 10 | 15 | 11 Periods | 0 Overlap | 306653.2 | 296899.8 | 0.0294 |
| H023005 | 2  | 30 | 11 Periods | 0 Overlap | 11159.96 | 11127.94 | 0.0029 |
| H023006 | 2  | 30 | 11 Periods | 0 Overlap | 17826.16 | 16580.29 | 0.0646 |
| H023007 | 2  | 30 | 11 Periods | 0 Overlap | 2588.446 | 2492.732 | 0.037  |
| H023008 | 2  | 30 | 11 Periods | 0 Overlap | 17621.58 | 16393.16 | 0.0431 |
| H023009 | 2  | 30 | 11 Periods | 0 Overlap | 4629.885 | 4586.584 | 0.0094 |
| H023010 | 2  | 30 | 11 Periods | 0 Overlap | 22715.55 | 22149.03 | 0.0121 |
| H063005 | 6  | 30 | 11 Periods | 0 Overlap | 196097   | 193089.3 | 0.0114 |

|         |    |    |            |           |          |          |        |
|---------|----|----|------------|-----------|----------|----------|--------|
| H063006 | 6  | 30 | 11 Periods | 0 Overlap | 132999.7 | 115051.1 | 0.0243 |
| H063007 | 6  | 30 | 11 Periods | 0 Overlap | 140973.1 | 125118.2 | 0.0117 |
| H063008 | 6  | 30 | 11 Periods | 0 Overlap | 311796.6 | 284364.9 | 0.0776 |
| H063009 | 6  | 30 | 11 Periods | 0 Overlap | 97789.12 | 92832.93 | 0.0099 |
| H063010 | 6  | 30 | 11 Periods | 0 Overlap | 287921.1 | 247995.9 | 0.0782 |
| H103005 | 10 | 30 | 11 Periods | 0 Overlap | 629723.7 | 562211.8 | 0.0838 |
| H103006 | 10 | 30 | 11 Periods | 0 Overlap | 437224.1 | 417626   | 0.034  |
| H103007 | 10 | 30 | 11 Periods | 0 Overlap | 528002   | 469613.7 | 0.0637 |
| H103008 | 10 | 30 | 11 Periods | 0 Overlap | 361586.8 | 347648.3 | 0.0277 |
| H103009 | 10 | 30 | 11 Periods | 0 Overlap | 735876.1 | 689313   | 0.0624 |
| H103010 | 10 | 30 | 11 Periods | 0 Overlap | 430691   | 362181.2 | 0.1088 |
| H026005 | 2  | 60 | 11 Periods | 0 Overlap | 137974.3 | 133680.4 | 0.022  |
| H026006 | 2  | 60 | 11 Periods | 0 Overlap | 112200.9 | 108210.8 | 0.0239 |
| H026007 | 2  | 60 | 11 Periods | 0 Overlap | 78408.36 | 73696.67 | 0.0232 |
| H026008 | 2  | 60 | 11 Periods | 0 Overlap | 192983.6 | 190127.6 | 0.0108 |
| H026009 | 2  | 60 | 11 Periods | 0 Overlap | 45174.75 | 42532.47 | 0.0198 |
| H026010 | 2  | 60 | 11 Periods | 0 Overlap | 117310.3 | 114457.2 | 0.0156 |
| H066005 | 6  | 60 | 11 Periods | 0 Overlap | 442241   | 402245   | 0.0874 |
| H066006 | 6  | 60 | 11 Periods | 0 Overlap | 356827.9 | 256409.7 | 0.2545 |
| H066007 | 6  | 60 | 11 Periods | 0 Overlap | 423134.2 | 342608.9 | 0.1785 |
| H066008 | 6  | 60 | 11 Periods | 0 Overlap | 210832.1 | 202225.6 | 0.0329 |
| H066009 | 6  | 60 | 11 Periods | 0 Overlap | 381716.8 | 352152.6 | 0.0707 |
| H066010 | 6  | 60 | 11 Periods | 0 Overlap | 366867.6 | 337955.3 | 0.0713 |
| H106005 | 10 | 60 | 11 Periods | 0 Overlap | 759950.6 | 641631.2 | 0.091  |
| H106006 | 10 | 60 | 11 Periods | 0 Overlap | 476727.3 | 426936.3 | 0.0558 |
| H106007 | 10 | 60 | 11 Periods | 0 Overlap | 591006.6 | 508016.6 | 0.0514 |
| H106008 | 10 | 60 | 11 Periods | 0 Overlap | 809189   | 632588.4 | 0.1697 |
| H106009 | 10 | 60 | 11 Periods | 0 Overlap | 732877   | 578752   | 0.1328 |
| H106010 | 10 | 60 | 11 Periods | 0 Overlap | 621413.5 | 541255.6 | 0.094  |
| H021503 | 2  | 15 | 3 Periods  | 1 Overlap | 12599.74 | 12578.9  | 0.0017 |
| H021504 | 2  | 15 | 3 Periods  | 1 Overlap | 2442.471 | 1699.819 | 0.1377 |

|         |    |    |           |           |          |          |        |
|---------|----|----|-----------|-----------|----------|----------|--------|
| H021505 | 2  | 15 | 3 Periods | 1 Overlap | 12432.83 | 11140.52 | 0.0695 |
| H021506 | 2  | 15 | 3 Periods | 1 Overlap | 6809     | 6452.78  | 0.0523 |
| H021507 | 2  | 15 | 3 Periods | 1 Overlap | 2958.24  | 2958.24  | 0      |
| H021508 | 2  | 15 | 3 Periods | 1 Overlap | 5435.833 | 4802.472 | 0.0541 |
| H021509 | 2  | 15 | 3 Periods | 1 Overlap | 3489.6   | 3489.6   | 0      |
| H021510 | 2  | 15 | 3 Periods | 1 Overlap | 7785.697 | 6565.656 | 0.0757 |
| H061503 | 6  | 15 | 3 Periods | 1 Overlap | 160126.3 | 152259.1 | 0.0491 |
| H061504 | 6  | 15 | 3 Periods | 1 Overlap | 359917.4 | 322006   | 0.0679 |
| H061505 | 6  | 15 | 3 Periods | 1 Overlap | 90681.75 | 81391.68 | 0.0346 |
| H061506 | 6  | 15 | 3 Periods | 1 Overlap | 374383   | 339159   | 0.0643 |
| H061507 | 6  | 15 | 3 Periods | 1 Overlap | 139469.3 | 119007.7 | 0.0715 |
| H061508 | 6  | 15 | 3 Periods | 1 Overlap | 85469.63 | 74076.03 | 0.112  |
| H061509 | 6  | 15 | 3 Periods | 1 Overlap | 315148.2 | 296173   | 0.049  |
| H061510 | 6  | 15 | 3 Periods | 1 Overlap | 391611.7 | 376561.8 | 0.0297 |
| H101503 | 10 | 15 | 3 Periods | 1 Overlap | 383707.9 | 367919.2 | 0.0402 |
| H101504 | 10 | 15 | 3 Periods | 1 Overlap | 324680.1 | 309730.4 | 0.0241 |
| H101505 | 10 | 15 | 3 Periods | 1 Overlap | 499416.4 | 476703.9 | 0.0422 |
| H101506 | 10 | 15 | 3 Periods | 1 Overlap | 122299.7 | 112806.9 | 0.0669 |
| H101507 | 10 | 15 | 3 Periods | 1 Overlap | 448114.3 | 425421.7 | 0.0506 |
| H101508 | 10 | 15 | 3 Periods | 1 Overlap | 240022.2 | 228229   | 0.0457 |
| H101509 | 10 | 15 | 3 Periods | 1 Overlap | 398846.1 | 382885.8 | 0.0194 |
| H101510 | 10 | 15 | 3 Periods | 1 Overlap | 308240.9 | 290047.1 | 0.0518 |
| H023005 | 2  | 30 | 3 Periods | 1 Overlap | 11170.11 | 10381.46 | 0.0698 |
| H023006 | 2  | 30 | 3 Periods | 1 Overlap | 18478.72 | 16277.35 | 0.0817 |
| H023007 | 2  | 30 | 3 Periods | 1 Overlap | 2588.446 | 2172.623 | 0.1606 |
| H023008 | 2  | 30 | 3 Periods | 1 Overlap | 17569.36 | 15614.37 | 0.0886 |
| H023009 | 2  | 30 | 3 Periods | 1 Overlap | 4672.604 | 4475.132 | 0.0334 |
| H023010 | 2  | 30 | 3 Periods | 1 Overlap | 22420.28 | 22140.86 | 0.0125 |
| H063005 | 6  | 30 | 3 Periods | 1 Overlap | 196633.9 | 185029   | 0.0527 |
| H063006 | 6  | 30 | 3 Periods | 1 Overlap | 118960.3 | 113773.3 | 0.0351 |
| H063007 | 6  | 30 | 3 Periods | 1 Overlap | 129646.8 | 118047.8 | 0.0675 |

|         |    |    |           |           |          |          |        |
|---------|----|----|-----------|-----------|----------|----------|--------|
| H063008 | 6  | 30 | 3 Periods | 1 Overlap | 313785.4 | 277271.1 | 0.1006 |
| H063009 | 6  | 30 | 3 Periods | 1 Overlap | 96784.17 | 91901.86 | 0.0198 |
| H063010 | 6  | 30 | 3 Periods | 1 Overlap | 278268.2 | 244287.1 | 0.092  |
| H103005 | 10 | 30 | 3 Periods | 1 Overlap | 896291.8 | 545695.7 | 0.1107 |
| H103006 | 10 | 30 | 3 Periods | 1 Overlap | 435371.1 | 413791.3 | 0.0428 |
| H103007 | 10 | 30 | 3 Periods | 1 Overlap | 523144.3 | 457013.6 | 0.0888 |
| H103008 | 10 | 30 | 3 Periods | 1 Overlap | 357562.6 | 341550.8 | 0.0448 |
| H103009 | 10 | 30 | 3 Periods | 1 Overlap | 743536.3 | 672848.3 | 0.0848 |
| H103010 | 10 | 30 | 3 Periods | 1 Overlap | 437789.3 | 362305.7 | 0.1085 |
| H026005 | 2  | 60 | 3 Periods | 1 Overlap | 137281.1 | 132827   | 0.0283 |
| H026006 | 2  | 60 | 3 Periods | 1 Overlap | 112338.1 | 107687.1 | 0.0286 |
| H026007 | 2  | 60 | 3 Periods | 1 Overlap | 76287.08 | 71317.68 | 0.0547 |
| H026008 | 2  | 60 | 3 Periods | 1 Overlap | 193119.9 | 189655.2 | 0.0133 |
| H026009 | 2  | 60 | 3 Periods | 1 Overlap | 44750.35 | 41862.39 | 0.0352 |
| H026010 | 2  | 60 | 3 Periods | 1 Overlap | 117710.9 | 112197.9 | 0.035  |
| H066005 | 6  | 60 | 3 Periods | 1 Overlap | 453463.1 | 396283.1 | 0.101  |
| H066006 | 6  | 60 | 3 Periods | 1 Overlap | 369527.7 | 248499.9 | 0.2775 |
| H066007 | 6  | 60 | 3 Periods | 1 Overlap | 467078.7 | 344419.9 | 0.1742 |
| H066008 | 6  | 60 | 3 Periods | 1 Overlap | 474410.3 | 199577.5 | 0.0455 |
| H066009 | 6  | 60 | 3 Periods | 1 Overlap | 398624.8 | 347765.3 | 0.0823 |
| H066010 | 6  | 60 | 3 Periods | 1 Overlap | 382448.1 | 327178.1 | 0.1009 |
| H106005 | 10 | 60 | 3 Periods | 1 Overlap | 732243.3 | 613953.2 | 0.1302 |
| H106006 | 10 | 60 | 3 Periods | 1 Overlap | 452180.5 | 407751.7 | 0.0983 |
| H106007 | 10 | 60 | 3 Periods | 1 Overlap | 544198.9 | 480163.6 | 0.1034 |
| H106008 | 10 | 60 | 3 Periods | 1 Overlap | 812382.1 | 582641   | 0.2353 |
| H106009 | 10 | 60 | 3 Periods | 1 Overlap | 675274.4 | 545754.6 | 0.1823 |
| H106010 | 10 | 60 | 3 Periods | 1 Overlap | 605429.9 | 518580.3 | 0.1319 |
| H021503 | 2  | 15 | 5 Periods | 1 Overlap | 12599.74 | 12580.69 | 0.0015 |
| H021504 | 2  | 15 | 5 Periods | 1 Overlap | 1984.283 | 1895.519 | 0.0384 |
| H021505 | 2  | 15 | 5 Periods | 1 Overlap | 12887.35 | 11915.5  | 0.0048 |
| H021506 | 2  | 15 | 5 Periods | 1 Overlap | 6809     | 6740.267 | 0.0101 |

|         |    |    |           |           |          |          |        |
|---------|----|----|-----------|-----------|----------|----------|--------|
| H021507 | 2  | 15 | 5 Periods | 1 Overlap | 2958.24  | 2958.24  | 0      |
| H021508 | 2  | 15 | 5 Periods | 1 Overlap | 5360.767 | 4881.706 | 0.0385 |
| H021509 | 2  | 15 | 5 Periods | 1 Overlap | 3489.6   | 3489.6   | 0      |
| H021510 | 2  | 15 | 5 Periods | 1 Overlap | 7738.749 | 6673.448 | 0.0605 |
| H061503 | 6  | 15 | 5 Periods | 1 Overlap | 166626.7 | 155725.7 | 0.0275 |
| H061504 | 6  | 15 | 5 Periods | 1 Overlap | 353954.6 | 335022   | 0.0303 |
| H061505 | 6  | 15 | 5 Periods | 1 Overlap | 85257.44 | 82267.47 | 0.0242 |
| H061506 | 6  | 15 | 5 Periods | 1 Overlap | 363706.1 | 348356.9 | 0.0389 |
| H061507 | 6  | 15 | 5 Periods | 1 Overlap | 129441.8 | 124716.6 | 0.027  |
| H061508 | 6  | 15 | 5 Periods | 1 Overlap | 85436.01 | 76467.6  | 0.0833 |
| H061509 | 6  | 15 | 5 Periods | 1 Overlap | 318570.3 | 300909.7 | 0.0338 |
| H061510 | 6  | 15 | 5 Periods | 1 Overlap | 395035.1 | 385354.7 | 0.007  |
| H101503 | 10 | 15 | 5 Periods | 1 Overlap | 383430.5 | 366375.4 | 0.0442 |
| H101504 | 10 | 15 | 5 Periods | 1 Overlap | 317992.1 | 312308.5 | 0.016  |
| H101505 | 10 | 15 | 5 Periods | 1 Overlap | 500143.4 | 483694.4 | 0.0281 |
| H101506 | 10 | 15 | 5 Periods | 1 Overlap | 121430.8 | 115387.6 | 0.0456 |
| H101507 | 10 | 15 | 5 Periods | 1 Overlap | 448114.3 | 430698.4 | 0.0389 |
| H101508 | 10 | 15 | 5 Periods | 1 Overlap | 239987.2 | 230492   | 0.0362 |
| H101509 | 10 | 15 | 5 Periods | 1 Overlap | 390968.6 | 383840.8 | 0.0169 |
| H101510 | 10 | 15 | 5 Periods | 1 Overlap | 306910   | 291189.1 | 0.0481 |
| H023005 | 2  | 30 | 5 Periods | 1 Overlap | 11170.11 | 10472.78 | 0.0616 |
| H023006 | 2  | 30 | 5 Periods | 1 Overlap | 18352.59 | 16712.01 | 0.0572 |
| H023007 | 2  | 30 | 5 Periods | 1 Overlap | 2588.446 | 2385.358 | 0.0785 |
| H023008 | 2  | 30 | 5 Periods | 1 Overlap | 17332.79 | 16115    | 0.0594 |
| H023009 | 2  | 30 | 5 Periods | 1 Overlap | 4629.885 | 4542.491 | 0.0189 |
| H023010 | 2  | 30 | 5 Periods | 1 Overlap | 22559.91 | 22144.87 | 0.0123 |
| H063005 | 6  | 30 | 5 Periods | 1 Overlap | 196807.3 | 191633.8 | 0.0189 |
| H063006 | 6  | 30 | 5 Periods | 1 Overlap | 117914.2 | 116464.1 | 0.0123 |
| H063007 | 6  | 30 | 5 Periods | 1 Overlap | 126893.1 | 125759.4 | 0.0066 |
| H063008 | 6  | 30 | 5 Periods | 1 Overlap | 311541.5 | 283857.6 | 0.0792 |
| H063009 | 6  | 30 | 5 Periods | 1 Overlap | 93918.37 | 93056.64 | 0.0075 |

|         |    |    |           |           |          |          |        |
|---------|----|----|-----------|-----------|----------|----------|--------|
| H063010 | 6  | 30 | 5 Periods | 1 Overlap | 273984.8 | 248101.1 | 0.0778 |
| H103005 | 10 | 30 | 5 Periods | 1 Overlap | 624982.7 | 553361.6 | 0.0982 |
| H103006 | 10 | 30 | 5 Periods | 1 Overlap | 433012.6 | 415122.8 | 0.0398 |
| H103007 | 10 | 30 | 5 Periods | 1 Overlap | 506193.7 | 459602.3 | 0.0836 |
| H103008 | 10 | 30 | 5 Periods | 1 Overlap | 360356.4 | 342340.8 | 0.0426 |
| H103009 | 10 | 30 | 5 Periods | 1 Overlap | 735901   | 681410.5 | 0.0732 |
| H103010 | 10 | 30 | 5 Periods | 1 Overlap | 407109   | 366809.3 | 0.0974 |
| H026005 | 2  | 60 | 5 Periods | 1 Overlap | 137281.1 | 132977.2 | 0.0272 |
| H026006 | 2  | 60 | 5 Periods | 1 Overlap | 112062.7 | 107951.4 | 0.0262 |
| H026007 | 2  | 60 | 5 Periods | 1 Overlap | 76287.08 | 73014.74 | 0.0322 |
| H026008 | 2  | 60 | 5 Periods | 1 Overlap | 193135.6 | 189822.1 | 0.0124 |
| H026009 | 2  | 60 | 5 Periods | 1 Overlap | 44612.77 | 41979.37 | 0.0325 |
| H026010 | 2  | 60 | 5 Periods | 1 Overlap | 119203.9 | 114157.6 | 0.0182 |
| H066005 | 6  | 60 | 5 Periods | 1 Overlap | 442253.6 | 384323.6 | 0.1281 |
| H066006 | 6  | 60 | 5 Periods | 1 Overlap | 360778.6 | 257873.9 | 0.2502 |
| H066007 | 6  | 60 | 5 Periods | 1 Overlap | 448043.3 | 344258.2 | 0.1745 |
| H066008 | 6  | 60 | 5 Periods | 1 Overlap | 225365.1 | 197823.8 | 0.0539 |
| H066009 | 6  | 60 | 5 Periods | 1 Overlap | 391006   | 340869.2 | 0.1005 |
| H066010 | 6  | 60 | 5 Periods | 1 Overlap | 375987.5 | 329274.7 | 0.0951 |
| H106005 | 10 | 60 | 5 Periods | 1 Overlap | 714499.4 | 606799.2 | 0.1403 |
| H106006 | 10 | 60 | 5 Periods | 1 Overlap | 456647.8 | 416875.1 | 0.0781 |
| H106007 | 10 | 60 | 5 Periods | 1 Overlap | 536061.9 | 491210.2 | 0.0828 |
| H106008 | 10 | 60 | 5 Periods | 1 Overlap | 761872.9 | 595975.3 | 0.2177 |
| H106009 | 10 | 60 | 5 Periods | 1 Overlap | 685615.7 | 523536.5 | 0.2155 |
| H106010 | 10 | 60 | 5 Periods | 1 Overlap | 603201.9 | 516886.9 | 0.1348 |
| H021503 | 2  | 15 | 7 Periods | 1 Overlap | 12599.74 | 12592.52 | 0.0006 |
| H021504 | 2  | 15 | 7 Periods | 1 Overlap | 1984.283 | 1873.34  | 0.0496 |
| H021505 | 2  | 15 | 7 Periods | 1 Overlap | 12260.67 | 11618.95 | 0.0296 |
| H021506 | 2  | 15 | 7 Periods | 1 Overlap | 6809     | 6808.203 | 0.0001 |
| H021507 | 2  | 15 | 7 Periods | 1 Overlap | 2958.24  | 2958.24  | 0      |
| H021508 | 2  | 15 | 7 Periods | 1 Overlap | 5513.9   | 4889.191 | 0.0371 |

|         |    |    |           |           |          |          |        |
|---------|----|----|-----------|-----------|----------|----------|--------|
| H021509 | 2  | 15 | 7 Periods | 1 Overlap | 3489.6   | 3489.6   | 0      |
| H021510 | 2  | 15 | 7 Periods | 1 Overlap | 7103.005 | 6777.882 | 0.0458 |
| H061503 | 6  | 15 | 7 Periods | 1 Overlap | 161859.4 | 156230.3 | 0.0243 |
| H061504 | 6  | 15 | 7 Periods | 1 Overlap | 345807.3 | 338386.1 | 0.0205 |
| H061505 | 6  | 15 | 7 Periods | 1 Overlap | 84566.51 | 84282.75 | 0.0003 |
| H061506 | 6  | 15 | 7 Periods | 1 Overlap | 363322.1 | 352345.3 | 0.0279 |
| H061507 | 6  | 15 | 7 Periods | 1 Overlap | 128390.6 | 125618.1 | 0.0199 |
| H061508 | 6  | 15 | 7 Periods | 1 Overlap | 86151.7  | 77515.87 | 0.0708 |
| H061509 | 6  | 15 | 7 Periods | 1 Overlap | 311423   | 303198.4 | 0.0264 |
| H061510 | 6  | 15 | 7 Periods | 1 Overlap | 388299.8 | 386505.2 | 0.004  |
| H101503 | 10 | 15 | 7 Periods | 1 Overlap | 383707.9 | 369012.5 | 0.0374 |
| H101504 | 10 | 15 | 7 Periods | 1 Overlap | 318291.5 | 310173.7 | 0.0227 |
| H101505 | 10 | 15 | 7 Periods | 1 Overlap | 497682.6 | 484646   | 0.0262 |
| H101506 | 10 | 15 | 7 Periods | 1 Overlap | 120895.1 | 115435.5 | 0.0452 |
| H101507 | 10 | 15 | 7 Periods | 1 Overlap | 448161.1 | 430065.4 | 0.0403 |
| H101508 | 10 | 15 | 7 Periods | 1 Overlap | 239566.3 | 232114.9 | 0.0295 |
| H101509 | 10 | 15 | 7 Periods | 1 Overlap | 390936   | 381429.1 | 0.0231 |
| H101510 | 10 | 15 | 7 Periods | 1 Overlap | 317033.6 | 293637.2 | 0.0401 |
| H023005 | 2  | 30 | 7 Periods | 1 Overlap | 11170.11 | 10759.4  | 0.0359 |
| H023006 | 2  | 30 | 7 Periods | 1 Overlap | 17815.96 | 16889.35 | 0.0472 |
| H023007 | 2  | 30 | 7 Periods | 1 Overlap | 2588.446 | 2494.6   | 0.0363 |
| H023008 | 2  | 30 | 7 Periods | 1 Overlap | 17226.34 | 16473.75 | 0.0384 |
| H023009 | 2  | 30 | 7 Periods | 1 Overlap | 4629.885 | 4570.341 | 0.0129 |
| H023010 | 2  | 30 | 7 Periods | 1 Overlap | 22573.27 | 22148.7  | 0.0121 |
| H063005 | 6  | 30 | 7 Periods | 1 Overlap | 195380.4 | 191447.5 | 0.0199 |
| H063006 | 6  | 30 | 7 Periods | 1 Overlap | 118186.3 | 115091.5 | 0.0239 |
| H063007 | 6  | 30 | 7 Periods | 1 Overlap | 126668.5 | 126024.6 | 0.0045 |
| H063008 | 6  | 30 | 7 Periods | 1 Overlap | 313782.1 | 286247.5 | 0.0715 |
| H063009 | 6  | 30 | 7 Periods | 1 Overlap | 95202.35 | 92825.36 | 0.0099 |
| H063010 | 6  | 30 | 7 Periods | 1 Overlap | 272280.8 | 245965.9 | 0.0857 |
| H103005 | 10 | 30 | 7 Periods | 1 Overlap | 620304.6 | 558193.2 | 0.0903 |

|         |    |    |           |           |          |          |        |
|---------|----|----|-----------|-----------|----------|----------|--------|
| H103006 | 10 | 30 | 7 Periods | 1 Overlap | 432714.9 | 417458.9 | 0.0344 |
| H103007 | 10 | 30 | 7 Periods | 1 Overlap | 506701.5 | 459800.6 | 0.0832 |
| H103008 | 10 | 30 | 7 Periods | 1 Overlap | 360278.9 | 342470.1 | 0.0422 |
| H103009 | 10 | 30 | 7 Periods | 1 Overlap | 735426   | 682389.9 | 0.0719 |
| H103010 | 10 | 30 | 7 Periods | 1 Overlap | 415595.7 | 364903.6 | 0.1021 |
| H026005 | 2  | 60 | 7 Periods | 1 Overlap | 138746.9 | 133416.4 | 0.024  |
| H026006 | 2  | 60 | 7 Periods | 1 Overlap | 113543.2 | 108102.4 | 0.0249 |
| H026007 | 2  | 60 | 7 Periods | 1 Overlap | 78123.06 | 73516.1  | 0.0256 |
| H026008 | 2  | 60 | 7 Periods | 1 Overlap | 193136.2 | 189938.4 | 0.0118 |
| H026009 | 2  | 60 | 7 Periods | 1 Overlap | 45223.13 | 42350.75 | 0.024  |
| H026010 | 2  | 60 | 7 Periods | 1 Overlap | 117161.6 | 114391.2 | 0.0162 |
| H066005 | 6  | 60 | 7 Periods | 1 Overlap | 445883.5 | 382101.4 | 0.1331 |
| H066006 | 6  | 60 | 7 Periods | 1 Overlap | 343927.5 | 255696.9 | 0.2565 |
| H066007 | 6  | 60 | 7 Periods | 1 Overlap | 430945.1 | 341485.9 | 0.1812 |
| H066008 | 6  | 60 | 7 Periods | 1 Overlap | 209100.8 | 198252   | 0.0519 |
| H066009 | 6  | 60 | 7 Periods | 1 Overlap | 388904.1 | 340813   | 0.1006 |
| H066010 | 6  | 60 | 7 Periods | 1 Overlap | 378413.6 | 329257.5 | 0.0952 |
| H106005 | 10 | 60 | 7 Periods | 1 Overlap | 715024.8 | 572866.4 | 0.1884 |
| H106006 | 10 | 60 | 7 Periods | 1 Overlap | 464866.8 | 412538.1 | 0.0877 |
| H106007 | 10 | 60 | 7 Periods | 1 Overlap | 535562.2 | 492623.6 | 0.0802 |
| H106008 | 10 | 60 | 7 Periods | 1 Overlap | 767575.8 | 577426.2 | 0.2421 |
| H106009 | 10 | 60 | 7 Periods | 1 Overlap | 667392   | 530457.6 | 0.2052 |
| H106010 | 10 | 60 | 7 Periods | 1 Overlap | 597400.8 | 519210.5 | 0.1309 |
| H021503 | 2  | 15 | 9 Periods | 1 Overlap | 12599.74 | 12589.91 | 0.0008 |
| H021504 | 2  | 15 | 9 Periods | 1 Overlap | 1971.178 | 1971.178 | 0      |
| H021505 | 2  | 15 | 9 Periods | 1 Overlap | 11972.81 | 11972.81 | 0      |
| H021506 | 2  | 15 | 9 Periods | 1 Overlap | 6809     | 6809     | 0      |
| H021507 | 2  | 15 | 9 Periods | 1 Overlap | 2958.24  | 2958.24  | 0      |
| H021508 | 2  | 15 | 9 Periods | 1 Overlap | 5077.368 | 5077.368 | 0      |
| H021509 | 2  | 15 | 9 Periods | 1 Overlap | 3489.6   | 3489.6   | 0      |
| H021510 | 2  | 15 | 9 Periods | 1 Overlap | 7103.005 | 6998.546 | 0.0147 |

|         |    |    |           |           |          |          |        |
|---------|----|----|-----------|-----------|----------|----------|--------|
| H061503 | 6  | 15 | 9 Periods | 1 Overlap | 160977.2 | 156810.9 | 0.0207 |
| H061504 | 6  | 15 | 9 Periods | 1 Overlap | 345700.9 | 341188.6 | 0.0124 |
| H061505 | 6  | 15 | 9 Periods | 1 Overlap | 84354.29 | 84290.9  | 0.0002 |
| H061506 | 6  | 15 | 9 Periods | 1 Overlap | 363785.6 | 356858.4 | 0.0154 |
| H061507 | 6  | 15 | 9 Periods | 1 Overlap | 128306.6 | 126347.8 | 0.0142 |
| H061508 | 6  | 15 | 9 Periods | 1 Overlap | 85423.69 | 78624.98 | 0.0575 |
| H061509 | 6  | 15 | 9 Periods | 1 Overlap | 313757.4 | 304465.6 | 0.0223 |
| H061510 | 6  | 15 | 9 Periods | 1 Overlap | 388139.3 | 387538.9 | 0.0014 |
| H101503 | 10 | 15 | 9 Periods | 1 Overlap | 383334.6 | 368317.5 | 0.0392 |
| H101504 | 10 | 15 | 9 Periods | 1 Overlap | 317457.4 | 311667.9 | 0.018  |
| H101505 | 10 | 15 | 9 Periods | 1 Overlap | 497682.6 | 488430   | 0.0186 |
| H101506 | 10 | 15 | 9 Periods | 1 Overlap | 121199.3 | 118437.3 | 0.0203 |
| H101507 | 10 | 15 | 9 Periods | 1 Overlap | 453448.4 | 436103.1 | 0.0268 |
| H101508 | 10 | 15 | 9 Periods | 1 Overlap | 239419.7 | 233400.7 | 0.0241 |
| H101509 | 10 | 15 | 9 Periods | 1 Overlap | 390673.2 | 385542.5 | 0.0126 |
| H101510 | 10 | 15 | 9 Periods | 1 Overlap | 307128.9 | 294476.8 | 0.0373 |
| H023005 | 2  | 30 | 9 Periods | 1 Overlap | 11159.96 | 10779.79 | 0.0341 |
| H023006 | 2  | 30 | 9 Periods | 1 Overlap | 17815.96 | 16949.87 | 0.0437 |
| H023007 | 2  | 30 | 9 Periods | 1 Overlap | 2878.564 | 2424.158 | 0.0635 |
| H023008 | 2  | 30 | 9 Periods | 1 Overlap | 17563.89 | 16470.51 | 0.0386 |
| H023009 | 2  | 30 | 9 Periods | 1 Overlap | 4629.885 | 4605.328 | 0.0053 |
| H023010 | 2  | 30 | 9 Periods | 1 Overlap | 22705.89 | 22146.28 | 0.0122 |
| H063005 | 6  | 30 | 9 Periods | 1 Overlap | 195747.2 | 191838   | 0.0179 |
| H063006 | 6  | 30 | 9 Periods | 1 Overlap | 118331   | 114891.4 | 0.0256 |
| H063007 | 6  | 30 | 9 Periods | 1 Overlap | 126730.6 | 126099.5 | 0.0039 |
| H063008 | 6  | 30 | 9 Periods | 1 Overlap | 312500.4 | 282620.3 | 0.0833 |
| H063009 | 6  | 30 | 9 Periods | 1 Overlap | 93839.78 | 92919.43 | 0.0089 |
| H063010 | 6  | 30 | 9 Periods | 1 Overlap | 276546.1 | 241086.6 | 0.1039 |
| H103005 | 10 | 30 | 9 Periods | 1 Overlap | 620199.7 | 551687.7 | 0.1009 |
| H103006 | 10 | 30 | 9 Periods | 1 Overlap | 433072   | 416837.8 | 0.0358 |
| H103007 | 10 | 30 | 9 Periods | 1 Overlap | 506359.5 | 455166.6 | 0.0925 |

|         |    |    |            |           |          |          |        |
|---------|----|----|------------|-----------|----------|----------|--------|
| H103008 | 10 | 30 | 9 Periods  | 1 Overlap | 360188.9 | 345212   | 0.0345 |
| H103009 | 10 | 30 | 9 Periods  | 1 Overlap | 739605.8 | 684941.4 | 0.0684 |
| H103010 | 10 | 30 | 9 Periods  | 1 Overlap | 414901.6 | 364643.9 | 0.1028 |
| H026005 | 2  | 60 | 9 Periods  | 1 Overlap | 138746.9 | 133432.2 | 0.0239 |
| H026006 | 2  | 60 | 9 Periods  | 1 Overlap | 111376.1 | 108302.1 | 0.0231 |
| H026007 | 2  | 60 | 9 Periods  | 1 Overlap | 76248.57 | 73617.37 | 0.0242 |
| H026008 | 2  | 60 | 9 Periods  | 1 Overlap | 193413.6 | 190061.1 | 0.0112 |
| H026009 | 2  | 60 | 9 Periods  | 1 Overlap | 43623.35 | 42171.74 | 0.0281 |
| H026010 | 2  | 60 | 9 Periods  | 1 Overlap | 117905.2 | 114485.1 | 0.0153 |
| H066005 | 6  | 60 | 9 Periods  | 1 Overlap | 440906.5 | 383773   | 0.1294 |
| H066006 | 6  | 60 | 9 Periods  | 1 Overlap | 353032.7 | 249619.1 | 0.2742 |
| H066007 | 6  | 60 | 9 Periods  | 1 Overlap | 421400.6 | 345430.6 | 0.1717 |
| H066008 | 6  | 60 | 9 Periods  | 1 Overlap | 210581.6 | 198272.3 | 0.0518 |
| H066009 | 6  | 60 | 9 Periods  | 1 Overlap | 382284.4 | 345707.6 | 0.0877 |
| H066010 | 6  | 60 | 9 Periods  | 1 Overlap | 363889.6 | 330973.3 | 0.0905 |
| H106005 | 10 | 60 | 9 Periods  | 1 Overlap | 714158.2 | 616943.6 | 0.1259 |
| H106006 | 10 | 60 | 9 Periods  | 1 Overlap | 468283   | 412526.9 | 0.0877 |
| H106007 | 10 | 60 | 9 Periods  | 1 Overlap | 535935.3 | 494024.3 | 0.0776 |
| H106008 | 10 | 60 | 9 Periods  | 1 Overlap | 775951.4 | 562204.3 | 0.2621 |
| H106009 | 10 | 60 | 9 Periods  | 1 Overlap | 674873.2 | 511589.3 | 0.2335 |
| H106010 | 10 | 60 | 9 Periods  | 1 Overlap | 610436.3 | 526698.7 | 0.1183 |
| H021503 | 2  | 15 | 11 Periods | 1 Overlap | 12599.74 | 12593.42 | 0.0005 |
| H021504 | 2  | 15 | 11 Periods | 1 Overlap | 1971.178 | 1971.178 | 0      |
| H021505 | 2  | 15 | 11 Periods | 1 Overlap | 11972.81 | 11912.64 | 0.005  |
| H021506 | 2  | 15 | 11 Periods | 1 Overlap | 6809     | 6612.781 | 0.0288 |
| H021507 | 2  | 15 | 11 Periods | 1 Overlap | 2958.24  | 2958.24  | 0      |
| H021509 | 2  | 15 | 11 Periods | 1 Overlap | 3489.6   | 3489.6   | 0      |
| H021510 | 2  | 15 | 11 Periods | 1 Overlap | 7103.005 | 7103.005 | 0      |
| H061503 | 6  | 15 | 11 Periods | 1 Overlap | 160667.8 | 158595   | 0.0096 |
| H061504 | 6  | 15 | 11 Periods | 1 Overlap | 345472.7 | 337115.6 | 0.0242 |
| H061505 | 6  | 15 | 11 Periods | 1 Overlap | 84399.84 | 84293.65 | 0.0001 |

|         |    |    |            |           |          |          |        |
|---------|----|----|------------|-----------|----------|----------|--------|
| H061506 | 6  | 15 | 11 Periods | 1 Overlap | 363903.5 | 347656.2 | 0.0408 |
| H061507 | 6  | 15 | 11 Periods | 1 Overlap | 128502.8 | 127327.6 | 0.0066 |
| H061508 | 6  | 15 | 11 Periods | 1 Overlap | 85803.11 | 79975.29 | 0.0413 |
| H061509 | 6  | 15 | 11 Periods | 1 Overlap | 316418.4 | 307439.1 | 0.0128 |
| H061510 | 6  | 15 | 11 Periods | 1 Overlap | 388139.3 | 387911.6 | 0.0004 |
| H101503 | 10 | 15 | 11 Periods | 1 Overlap | 391698.8 | 368386.6 | 0.039  |
| H101504 | 10 | 15 | 11 Periods | 1 Overlap | 317385.3 | 310807.2 | 0.0207 |
| H101505 | 10 | 15 | 11 Periods | 1 Overlap | 499102.2 | 483839.7 | 0.0278 |
| H101506 | 10 | 15 | 11 Periods | 1 Overlap | 121405   | 118416.9 | 0.0205 |
| H101507 | 10 | 15 | 11 Periods | 1 Overlap | 451063.1 | 431716.7 | 0.0366 |
| H101508 | 10 | 15 | 11 Periods | 1 Overlap | 239889.8 | 233265.2 | 0.0247 |
| H101509 | 10 | 15 | 11 Periods | 1 Overlap | 390999.6 | 381418.9 | 0.0231 |
| H101510 | 10 | 15 | 11 Periods | 1 Overlap | 306882.2 | 294897   | 0.036  |
| H023005 | 2  | 30 | 11 Periods | 1 Overlap | 11159.96 | 11135.27 | 0.0022 |
| H023006 | 2  | 30 | 11 Periods | 1 Overlap | 17943.56 | 17087.27 | 0.036  |
| H023007 | 2  | 30 | 11 Periods | 1 Overlap | 2588.446 | 2566.882 | 0.0083 |
| H023008 | 2  | 30 | 11 Periods | 1 Overlap | 17132.39 | 16511.39 | 0.0362 |
| H023009 | 2  | 30 | 11 Periods | 1 Overlap | 4629.885 | 4586.584 | 0.0094 |
| H023010 | 2  | 30 | 11 Periods | 1 Overlap | 22715.55 | 22148.82 | 0.0121 |
| H063005 | 6  | 30 | 11 Periods | 1 Overlap | 195325.2 | 192194.3 | 0.016  |
| H063006 | 6  | 30 | 11 Periods | 1 Overlap | 118349.2 | 113883.3 | 0.0342 |
| H063007 | 6  | 30 | 11 Periods | 1 Overlap | 126753.6 | 125607.1 | 0.0078 |
| H063008 | 6  | 30 | 11 Periods | 1 Overlap | 314731.7 | 282233.9 | 0.0845 |
| H063009 | 6  | 30 | 11 Periods | 1 Overlap | 93918.37 | 92394.92 | 0.0145 |
| H063010 | 6  | 30 | 11 Periods | 1 Overlap | 273445.7 | 243334.6 | 0.0955 |
| H103005 | 10 | 30 | 11 Periods | 1 Overlap | 621509.7 | 556526.8 | 0.093  |
| H103006 | 10 | 30 | 11 Periods | 1 Overlap | 436268.5 | 416511.4 | 0.0366 |
| H103007 | 10 | 30 | 11 Periods | 1 Overlap | 501547   | 460468.4 | 0.0819 |
| H103008 | 10 | 30 | 11 Periods | 1 Overlap | 360746   | 341656.5 | 0.0445 |
| H103009 | 10 | 30 | 11 Periods | 1 Overlap | 735292.7 | 680732   | 0.0741 |
| H103010 | 10 | 30 | 11 Periods | 1 Overlap | 409823.5 | 364719   | 0.1026 |

|         |    |    |            |           |          |          |        |
|---------|----|----|------------|-----------|----------|----------|--------|
| H026005 | 2  | 60 | 11 Periods | 1 Overlap | 138038.4 | 133966.8 | 0.0199 |
| H026006 | 2  | 60 | 11 Periods | 1 Overlap | 112514.2 | 108365.7 | 0.0225 |
| H026007 | 2  | 60 | 11 Periods | 1 Overlap | 76377.77 | 72154.22 | 0.0436 |
| H026008 | 2  | 60 | 11 Periods | 1 Overlap | 193287.6 | 190204.8 | 0.0104 |
| H026009 | 2  | 60 | 11 Periods | 1 Overlap | 44008.02 | 42542.79 | 0.0196 |
| H026010 | 2  | 60 | 11 Periods | 1 Overlap | 117756.5 | 114612.8 | 0.0142 |
| H066005 | 6  | 60 | 11 Periods | 1 Overlap | 449235.6 | 386382.2 | 0.1234 |
| H066006 | 6  | 60 | 11 Periods | 1 Overlap | 359068.4 | 240106.5 | 0.3019 |
| H066007 | 6  | 60 | 11 Periods | 1 Overlap | 417051   | 336710.2 | 0.1926 |
| H066008 | 6  | 60 | 11 Periods | 1 Overlap | 209674.7 | 196663.7 | 0.0595 |
| H066009 | 6  | 60 | 11 Periods | 1 Overlap | 378949.3 | 346187   | 0.0865 |
| H066010 | 6  | 60 | 11 Periods | 1 Overlap | 364281.3 | 330825.5 | 0.0909 |
| H106005 | 10 | 60 | 11 Periods | 1 Overlap | 710703   | 604425.1 | 0.1437 |
| H106006 | 10 | 60 | 11 Periods | 1 Overlap | 456611.7 | 418043.9 | 0.0755 |
| H106007 | 10 | 60 | 11 Periods | 1 Overlap | 544910   | 498388.2 | 0.0694 |
| H106008 | 10 | 60 | 11 Periods | 1 Overlap | 779047.8 | 609324.1 | 0.2002 |
| H106009 | 10 | 60 | 11 Periods | 1 Overlap | 671934.8 | 555792.8 | 0.1672 |
| H106010 | 10 | 60 | 11 Periods | 1 Overlap | 605830.7 | 526414.5 | 0.1188 |
| H021503 | 2  | 15 | 3 Periods  | 2 Overlap | 12599.74 | 12587.01 | 0.001  |
| H021504 | 2  | 15 | 3 Periods  | 2 Overlap | 1971.178 | 1820.054 | 0.0767 |
| H021505 | 2  | 15 | 3 Periods  | 2 Overlap | 13849.66 | 11380.25 | 0.0495 |
| H021506 | 2  | 15 | 3 Periods  | 2 Overlap | 6809     | 6549.118 | 0.0382 |
| H021507 | 2  | 15 | 3 Periods  | 2 Overlap | 2958.24  | 2958.24  | 0      |
| H021508 | 2  | 15 | 3 Periods  | 2 Overlap | 5588.967 | 4931.606 | 0.0287 |
| H021509 | 2  | 15 | 3 Periods  | 2 Overlap | 3489.6   | 3489.6   | 0      |
| H021510 | 2  | 15 | 3 Periods  | 2 Overlap | 7103.005 | 6710.533 | 0.0553 |
| H061503 | 6  | 15 | 3 Periods  | 2 Overlap | 161160.9 | 150638.7 | 0.0593 |
| H061504 | 6  | 15 | 3 Periods  | 2 Overlap | 353377.4 | 318117.8 | 0.0792 |
| H061505 | 6  | 15 | 3 Periods  | 2 Overlap | 90916.45 | 81561.65 | 0.0325 |
| H061506 | 6  | 15 | 3 Periods  | 2 Overlap | 362588.7 | 331966.7 | 0.0841 |
| H061507 | 6  | 15 | 3 Periods  | 2 Overlap | 140732.9 | 119557.6 | 0.0672 |

|         |    |    |           |           |          |          |        |
|---------|----|----|-----------|-----------|----------|----------|--------|
| H061508 | 6  | 15 | 3 Periods | 2 Overlap | 83420.32 | 73755.11 | 0.1159 |
| H061509 | 6  | 15 | 3 Periods | 2 Overlap | 311824.5 | 290490.5 | 0.0672 |
| H061510 | 6  | 15 | 3 Periods | 2 Overlap | 403625.5 | 368001   | 0.0517 |
| H101503 | 10 | 15 | 3 Periods | 2 Overlap | 387495.1 | 325590.9 | 0.1506 |
| H101504 | 10 | 15 | 3 Periods | 2 Overlap | 317761.7 | 272396.8 | 0.1417 |
| H101505 | 10 | 15 | 3 Periods | 2 Overlap | 498674.1 | 429057.4 | 0.1379 |
| H101506 | 10 | 15 | 3 Periods | 2 Overlap | 120895.1 | 89926.11 | 0.2562 |
| H101507 | 10 | 15 | 3 Periods | 2 Overlap | 457164.8 | 358799.6 | 0.1993 |
| H101508 | 10 | 15 | 3 Periods | 2 Overlap | 239161.3 | 186807.7 | 0.2189 |
| H101509 | 10 | 15 | 3 Periods | 2 Overlap | 394168.3 | 341332.9 | 0.1258 |
| H101510 | 10 | 15 | 3 Periods | 2 Overlap | 315693.1 | 235624.2 | 0.2297 |
| H023005 | 2  | 30 | 3 Periods | 2 Overlap | 11170.11 | 10573.07 | 0.0526 |
| H023006 | 2  | 30 | 3 Periods | 2 Overlap | 18474.9  | 16578.91 | 0.0647 |
| H023007 | 2  | 30 | 3 Periods | 2 Overlap | 2841.463 | 2260.653 | 0.1266 |
| H023008 | 2  | 30 | 3 Periods | 2 Overlap | 17564.59 | 15791.62 | 0.0783 |
| H023009 | 2  | 30 | 3 Periods | 2 Overlap | 4672.604 | 4476.577 | 0.0331 |
| H023010 | 2  | 30 | 3 Periods | 2 Overlap | 22420.28 | 22142.38 | 0.0124 |
| H063005 | 6  | 30 | 3 Periods | 2 Overlap | 195745.6 | 175207.6 | 0.103  |
| H063006 | 6  | 30 | 3 Periods | 2 Overlap | 118436.8 | 109567.4 | 0.0708 |
| H063007 | 6  | 30 | 3 Periods | 2 Overlap | 127295.6 | 115502.8 | 0.0877 |
| H063008 | 6  | 30 | 3 Periods | 2 Overlap | 316692.4 | 258693   | 0.1609 |
| H063009 | 6  | 30 | 3 Periods | 2 Overlap | 93757.58 | 81119.62 | 0.1348 |
| H063010 | 6  | 30 | 3 Periods | 2 Overlap | 271757.6 | 226440.5 | 0.1583 |
| H103005 | 10 | 30 | 3 Periods | 2 Overlap | 1527751  | 310903.2 | 0.4933 |
| H103006 | 10 | 30 | 3 Periods | 2 Overlap | 780020.2 | 268314.5 | 0.3794 |
| H103007 | 10 | 30 | 3 Periods | 2 Overlap | 519366.5 | 195988.2 | 0.6092 |
| H103008 | 10 | 30 | 3 Periods | 2 Overlap | 1268710  | 181512.7 | 0.4924 |
| H103009 | 10 | 30 | 3 Periods | 2 Overlap | 736673.4 | 328051.4 | 0.5538 |
| H103010 | 10 | 30 | 3 Periods | 2 Overlap | 420119.5 | 189417.1 | 0.5339 |
| H026005 | 2  | 60 | 3 Periods | 2 Overlap | 136692.5 | 132968.7 | 0.0272 |
| H026006 | 2  | 60 | 3 Periods | 2 Overlap | 113564.8 | 107817.6 | 0.0274 |

|         |    |    |           |           |          |          |        |
|---------|----|----|-----------|-----------|----------|----------|--------|
| H026007 | 2  | 60 | 3 Periods | 2 Overlap | 75781.79 | 72394.75 | 0.0404 |
| H026008 | 2  | 60 | 3 Periods | 2 Overlap | 193135.6 | 189760.2 | 0.0127 |
| H026009 | 2  | 60 | 3 Periods | 2 Overlap | 44337.77 | 42112.71 | 0.0295 |
| H026010 | 2  | 60 | 3 Periods | 2 Overlap | 116269.4 | 112448   | 0.0329 |
| H066005 | 6  | 60 | 3 Periods | 2 Overlap | 460838.7 | 250176.7 | 0.4324 |
| H066006 | 6  | 60 | 3 Periods | 2 Overlap | 378808   | 125882.2 | 0.634  |
| H066007 | 6  | 60 | 3 Periods | 2 Overlap | 471896.9 | 201516.4 | 0.5168 |
| H066008 | 6  | 60 | 3 Periods | 2 Overlap | 1090095  | 122712.6 | 0.4131 |
| H066009 | 6  | 60 | 3 Periods | 2 Overlap | 2074623  | 215306.5 | 0.4318 |
| H066010 | 6  | 60 | 3 Periods | 2 Overlap | 1641979  | 173638.9 | 0.5228 |
| H106005 | 10 | 60 | 3 Periods | 2 Overlap | 3688099  | 297097.5 | 0.5791 |
| H106006 | 10 | 60 | 3 Periods | 2 Overlap | 1764741  | 252243.5 | 0.4422 |
| H106007 | 10 | 60 | 3 Periods | 2 Overlap | 1413544  | 281963.1 | 0.4735 |
| H106009 | 10 | 60 | 3 Periods | 2 Overlap | 2708732  | 285792.5 | 0.5718 |
| H106010 | 10 | 60 | 3 Periods | 2 Overlap | 2313667  | 282776.6 | 0.5267 |
| H021503 | 2  | 15 | 5 Periods | 2 Overlap | 12599.74 | 12593.42 | 0.0005 |
| H021504 | 2  | 15 | 5 Periods | 2 Overlap | 1971.178 | 1971.178 | 0      |
| H021505 | 2  | 15 | 5 Periods | 2 Overlap | 12260.67 | 11813.28 | 0.0133 |
| H021506 | 2  | 15 | 5 Periods | 2 Overlap | 7517.5   | 6718.578 | 0.0133 |
| H021507 | 2  | 15 | 5 Periods | 2 Overlap | 2958.24  | 2958.24  | 0      |
| H021508 | 2  | 15 | 5 Periods | 2 Overlap | 5435.833 | 5024.619 | 0.0104 |
| H021509 | 2  | 15 | 5 Periods | 2 Overlap | 3489.6   | 3489.6   | 0      |
| H021510 | 2  | 15 | 5 Periods | 2 Overlap | 7103.005 | 6989.793 | 0.0159 |
| H061503 | 6  | 15 | 5 Periods | 2 Overlap | 166816   | 154188.3 | 0.0371 |
| H061505 | 6  | 15 | 5 Periods | 2 Overlap | 85013.83 | 79904.84 | 0.0522 |
| H061506 | 6  | 15 | 5 Periods | 2 Overlap | 363187.6 | 336210.3 | 0.0724 |
| H061507 | 6  | 15 | 5 Periods | 2 Overlap | 128784   | 125072.7 | 0.0242 |
| H061508 | 6  | 15 | 5 Periods | 2 Overlap | 85436.01 | 75721.92 | 0.0923 |
| H061509 | 6  | 15 | 5 Periods | 2 Overlap | 313757.4 | 301419.3 | 0.0321 |
| H061510 | 6  | 15 | 5 Periods | 2 Overlap | 388076.8 | 377325.2 | 0.0277 |
| H101503 | 10 | 15 | 5 Periods | 2 Overlap | 386691.6 | 359498.6 | 0.0622 |

|         |    |    |           |           |          |          |        |
|---------|----|----|-----------|-----------|----------|----------|--------|
| H101504 | 10 | 15 | 5 Periods | 2 Overlap | 318231.7 | 301517.5 | 0.05   |
| H101505 | 10 | 15 | 5 Periods | 2 Overlap | 497682.6 | 475568.9 | 0.0444 |
| H101506 | 10 | 15 | 5 Periods | 2 Overlap | 121243   | 111516.4 | 0.0776 |
| H101507 | 10 | 15 | 5 Periods | 2 Overlap | 448114.3 | 422263.4 | 0.0577 |
| H101508 | 10 | 15 | 5 Periods | 2 Overlap | 240325.2 | 224346   | 0.0619 |
| H101509 | 10 | 15 | 5 Periods | 2 Overlap | 391442.3 | 372780   | 0.0452 |
| H101510 | 10 | 15 | 5 Periods | 2 Overlap | 306607.3 | 286385   | 0.0638 |
| H023005 | 2  | 30 | 5 Periods | 2 Overlap | 11170.11 | 10759.6  | 0.0359 |
| H023006 | 2  | 30 | 5 Periods | 2 Overlap | 18489.59 | 16773.54 | 0.0537 |
| H023007 | 2  | 30 | 5 Periods | 2 Overlap | 2588.446 | 2395.422 | 0.0746 |
| H023008 | 2  | 30 | 5 Periods | 2 Overlap | 17144.39 | 16137.3  | 0.0581 |
| H023009 | 2  | 30 | 5 Periods | 2 Overlap | 4672.604 | 4523.448 | 0.023  |
| H023010 | 2  | 30 | 5 Periods | 2 Overlap | 22516.4  | 22146.6  | 0.0122 |
| H063005 | 6  | 30 | 5 Periods | 2 Overlap | 196442.8 | 183324.4 | 0.0614 |
| H063006 | 6  | 30 | 5 Periods | 2 Overlap | 118272.3 | 113802.2 | 0.0349 |
| H063007 | 6  | 30 | 5 Periods | 2 Overlap | 126600.7 | 125058.4 | 0.0122 |
| H063008 | 6  | 30 | 5 Periods | 2 Overlap | 313625.8 | 273015.6 | 0.1144 |
| H063009 | 6  | 30 | 5 Periods | 2 Overlap | 93757.58 | 89563.07 | 0.0447 |
| H063010 | 6  | 30 | 5 Periods | 2 Overlap | 277587.2 | 233963.8 | 0.1303 |
| H103006 | 10 | 30 | 5 Periods | 2 Overlap | 436095.8 | 389128.7 | 0.0999 |
| H103007 | 10 | 30 | 5 Periods | 2 Overlap | 519477.8 | 407950.9 | 0.1866 |
| H103008 | 10 | 30 | 5 Periods | 2 Overlap | 359640.1 | 315839.1 | 0.1167 |
| H103009 | 10 | 30 | 5 Periods | 2 Overlap | 735321.6 | 620065.5 | 0.1566 |
| H026005 | 2  | 60 | 5 Periods | 2 Overlap | 137673.4 | 133278.8 | 0.025  |
| H026006 | 2  | 60 | 5 Periods | 2 Overlap | 111040.4 | 108113.3 | 0.0248 |
| H026007 | 2  | 60 | 5 Periods | 2 Overlap | 76927.81 | 73121.63 | 0.0308 |
| H026008 | 2  | 60 | 5 Periods | 2 Overlap | 193135.6 | 189896.2 | 0.012  |
| H026009 | 2  | 60 | 5 Periods | 2 Overlap | 43545.93 | 42392.63 | 0.023  |
| H026010 | 2  | 60 | 5 Periods | 2 Overlap | 116566.8 | 113341.8 | 0.0252 |
| H066005 | 6  | 60 | 5 Periods | 2 Overlap | 456860.4 | 359290.8 | 0.1849 |
| H066006 | 6  | 60 | 5 Periods | 2 Overlap | 389084.3 | 220675.1 | 0.3584 |

|         |    |    |           |           |          |          |        |
|---------|----|----|-----------|-----------|----------|----------|--------|
| H066007 | 6  | 60 | 5 Periods | 2 Overlap | 466332.8 | 305507.1 | 0.2675 |
| H066008 | 6  | 60 | 5 Periods | 2 Overlap | 221159.7 | 184077.9 | 0.1197 |
| H066009 | 6  | 60 | 5 Periods | 2 Overlap | 386417.4 | 325879.3 | 0.14   |
| H066010 | 6  | 60 | 5 Periods | 2 Overlap | 376961.5 | 308361.1 | 0.1526 |
| H106005 | 10 | 60 | 5 Periods | 2 Overlap | 735695.2 | 437652.7 | 0.38   |
| H106006 | 10 | 60 | 5 Periods | 2 Overlap | 457345.4 | 347093.1 | 0.2324 |
| H106007 | 10 | 60 | 5 Periods | 2 Overlap | 541126.4 | 400456.3 | 0.2523 |
| H106008 | 10 | 60 | 5 Periods | 2 Overlap | 809803.2 | 260153.8 | 0.6585 |
| H106009 | 10 | 60 | 5 Periods | 2 Overlap | 689774.1 | 316068.2 | 0.5264 |
| H106010 | 10 | 60 | 5 Periods | 2 Overlap | 617015.1 | 400128.7 | 0.3302 |
| H021503 | 2  | 15 | 7 Periods | 2 Overlap | 12599.74 | 12594.09 | 0.0004 |
| H021504 | 2  | 15 | 7 Periods | 2 Overlap | 1971.178 | 1969.071 | 0.0011 |
| H021505 | 2  | 15 | 7 Periods | 2 Overlap | 12010.89 | 11779.54 | 0.0161 |
| H021506 | 2  | 15 | 7 Periods | 2 Overlap | 6809     | 6673.677 | 0.0199 |
| H021507 | 2  | 15 | 7 Periods | 2 Overlap | 2958.24  | 2958.24  | 0      |
| H021508 | 2  | 15 | 7 Periods | 2 Overlap | 5360.767 | 5013.699 | 0.0125 |
| H021509 | 2  | 15 | 7 Periods | 2 Overlap | 3489.6   | 3489.6   | 0      |
| H021510 | 2  | 15 | 7 Periods | 2 Overlap | 7103.005 | 7049.595 | 0.0075 |
| H061503 | 6  | 15 | 7 Periods | 2 Overlap | 160490.5 | 156632.3 | 0.0218 |
| H061504 | 6  | 15 | 7 Periods | 2 Overlap | 347313.2 | 332166.5 | 0.0385 |
| H061505 | 6  | 15 | 7 Periods | 2 Overlap | 84304.74 | 84286.81 | 0.0002 |
| H061506 | 6  | 15 | 7 Periods | 2 Overlap | 362451.1 | 346346   | 0.0444 |
| H061507 | 6  | 15 | 7 Periods | 2 Overlap | 128173.1 | 125642.6 | 0.0197 |
| H061508 | 6  | 15 | 7 Periods | 2 Overlap | 85423.69 | 77442.94 | 0.0717 |
| H061509 | 6  | 15 | 7 Periods | 2 Overlap | 313757.4 | 303831.9 | 0.0244 |
| H061510 | 6  | 15 | 7 Periods | 2 Overlap | 388299.8 | 383086.9 | 0.0129 |
| H101503 | 10 | 15 | 7 Periods | 2 Overlap | 383334.6 | 360204   | 0.0603 |
| H101504 | 10 | 15 | 7 Periods | 2 Overlap | 317818.2 | 308700.2 | 0.0274 |
| H101505 | 10 | 15 | 7 Periods | 2 Overlap | 497682.6 | 481111.3 | 0.0333 |
| H101506 | 10 | 15 | 7 Periods | 2 Overlap | 121291.9 | 112654.1 | 0.0682 |
| H101507 | 10 | 15 | 7 Periods | 2 Overlap | 452139.4 | 427617.1 | 0.0457 |

|         |    |    |           |           |          |          |        |
|---------|----|----|-----------|-----------|----------|----------|--------|
| H101508 | 10 | 15 | 7 Periods | 2 Overlap | 240031   | 230231.3 | 0.0373 |
| H101509 | 10 | 15 | 7 Periods | 2 Overlap | 1102589  | 378658.5 | 0.0302 |
| H101510 | 10 | 15 | 7 Periods | 2 Overlap | 318024.6 | 291145   | 0.0482 |
| H023005 | 2  | 30 | 7 Periods | 2 Overlap | 11170.11 | 10897.22 | 0.0235 |
| H023006 | 2  | 30 | 7 Periods | 2 Overlap | 18123.34 | 16852.09 | 0.0493 |
| H023007 | 2  | 30 | 7 Periods | 2 Overlap | 2588.446 | 2447.563 | 0.0544 |
| H023008 | 2  | 30 | 7 Periods | 2 Overlap | 17132.39 | 16045.78 | 0.0634 |
| H023009 | 2  | 30 | 7 Periods | 2 Overlap | 4629.885 | 4570.341 | 0.0129 |
| H023010 | 2  | 30 | 7 Periods | 2 Overlap | 22573.27 | 22147.48 | 0.0122 |
| H063005 | 6  | 30 | 7 Periods | 2 Overlap | 195561.8 | 185864.4 | 0.0484 |
| H063006 | 6  | 30 | 7 Periods | 2 Overlap | 118449.3 | 114280.9 | 0.0308 |
| H063007 | 6  | 30 | 7 Periods | 2 Overlap | 126688.9 | 124697.3 | 0.015  |
| H063008 | 6  | 30 | 7 Periods | 2 Overlap | 311471.4 | 275845.1 | 0.1052 |
| H063009 | 6  | 30 | 7 Periods | 2 Overlap | 93860.74 | 90604.06 | 0.0336 |
| H063010 | 6  | 30 | 7 Periods | 2 Overlap | 271698.6 | 232926.4 | 0.1342 |
| H103005 | 10 | 30 | 7 Periods | 2 Overlap | 621886.7 | 514847.5 | 0.161  |
| H103006 | 10 | 30 | 7 Periods | 2 Overlap | 434733.5 | 395405.3 | 0.0854 |
| H103007 | 10 | 30 | 7 Periods | 2 Overlap | 528759.7 | 416238.2 | 0.1701 |
| H103010 | 10 | 30 | 7 Periods | 2 Overlap | 413455.6 | 340551.6 | 0.162  |
| H026005 | 2  | 60 | 7 Periods | 2 Overlap | 138591.7 | 133498.7 | 0.0234 |
| H026006 | 2  | 60 | 7 Periods | 2 Overlap | 110922.7 | 108229.1 | 0.0237 |
| H026007 | 2  | 60 | 7 Periods | 2 Overlap | 75444.92 | 73180.68 | 0.03   |
| H026008 | 2  | 60 | 7 Periods | 2 Overlap | 192832.1 | 190062.1 | 0.0112 |
| H026009 | 2  | 60 | 7 Periods | 2 Overlap | 44537.63 | 42562.46 | 0.0191 |
| H026010 | 2  | 60 | 7 Periods | 2 Overlap | 116695.5 | 114422.5 | 0.0159 |
| H066005 | 6  | 60 | 7 Periods | 2 Overlap | 445227.7 | 368326.1 | 0.1644 |
| H066006 | 6  | 60 | 7 Periods | 2 Overlap | 377056.5 | 242661.4 | 0.2944 |
| H066007 | 6  | 60 | 7 Periods | 2 Overlap | 468155.3 | 320724.3 | 0.231  |
| H066008 | 6  | 60 | 7 Periods | 2 Overlap | 210835.8 | 188756.6 | 0.0973 |
| H066009 | 6  | 60 | 7 Periods | 2 Overlap | 396255   | 332826   | 0.1217 |
| H066010 | 6  | 60 | 7 Periods | 2 Overlap | 378502.4 | 309540.9 | 0.1494 |

|         |    |    |           |           |          |          |        |
|---------|----|----|-----------|-----------|----------|----------|--------|
| H106006 | 10 | 60 | 7 Periods | 2 Overlap | 468184.7 | 365115.5 | 0.1925 |
| H106007 | 10 | 60 | 7 Periods | 2 Overlap | 547248   | 460830.1 | 0.1395 |
| H106008 | 10 | 60 | 7 Periods | 2 Overlap | 767941.7 | 452679.1 | 0.4058 |
| H106009 | 10 | 60 | 7 Periods | 2 Overlap | 686429.5 | 490840.4 | 0.2645 |
| H106010 | 10 | 60 | 7 Periods | 2 Overlap | 626912.8 | 460024.8 | 0.23   |
| H021503 | 2  | 15 | 9 Periods | 2 Overlap | 12599.74 | 12599.74 | 0      |
| H021504 | 2  | 15 | 9 Periods | 2 Overlap | 1971.178 | 1971.178 | 0      |
| H021505 | 2  | 15 | 9 Periods | 2 Overlap | 11972.81 | 11972.81 | 0      |
| H021506 | 2  | 15 | 9 Periods | 2 Overlap | 6809     | 6809     | 0      |
| H021507 | 2  | 15 | 9 Periods | 2 Overlap | 2958.24  | 2958.24  | 0      |
| H021508 | 2  | 15 | 9 Periods | 2 Overlap | 5360.767 | 5077.368 | 0      |
| H021509 | 2  | 15 | 9 Periods | 2 Overlap | 3489.6   | 3489.6   | 0      |
| H021510 | 2  | 15 | 9 Periods | 2 Overlap | 7103.005 | 7022.889 | 0.0113 |
| H061503 | 6  | 15 | 9 Periods | 2 Overlap | 160275.8 | 156848   | 0.0205 |
| H061504 | 6  | 15 | 9 Periods | 2 Overlap | 345700.9 | 331297.7 | 0.041  |
| H061505 | 6  | 15 | 9 Periods | 2 Overlap | 84484.49 | 84030.77 | 0.0032 |
| H061506 | 6  | 15 | 9 Periods | 2 Overlap | 363322.1 | 352984.2 | 0.0261 |
| H061507 | 6  | 15 | 9 Periods | 2 Overlap | 128306.6 | 126388   | 0.0139 |
| H061508 | 6  | 15 | 9 Periods | 2 Overlap | 85423.69 | 78670.65 | 0.0569 |
| H061509 | 6  | 15 | 9 Periods | 2 Overlap | 313566.3 | 305691   | 0.0184 |
| H061510 | 6  | 15 | 9 Periods | 2 Overlap | 393959   | 374580.7 | 0.0348 |
| H101503 | 10 | 15 | 9 Periods | 2 Overlap | 383919   | 363284.6 | 0.0523 |
| H101504 | 10 | 15 | 9 Periods | 2 Overlap | 318514.7 | 309301.1 | 0.0255 |
| H101505 | 10 | 15 | 9 Periods | 2 Overlap | 499306.9 | 480087.4 | 0.0354 |
| H101506 | 10 | 15 | 9 Periods | 2 Overlap | 121391.7 | 117152   | 0.031  |
| H101507 | 10 | 15 | 9 Periods | 2 Overlap | 452791.3 | 431521.8 | 0.037  |
| H101508 | 10 | 15 | 9 Periods | 2 Overlap | 240077.8 | 231812.4 | 0.0307 |
| H101509 | 10 | 15 | 9 Periods | 2 Overlap | 391009   | 382000   | 0.0227 |
| H101510 | 10 | 15 | 9 Periods | 2 Overlap | 314060.2 | 290946.4 | 0.0489 |
| H023005 | 2  | 30 | 9 Periods | 2 Overlap | 11159.96 | 11029.43 | 0.0117 |
| H023006 | 2  | 30 | 9 Periods | 2 Overlap | 17907.5  | 16976.47 | 0.0422 |

|         |    |    |           |           |          |          |        |
|---------|----|----|-----------|-----------|----------|----------|--------|
| H023007 | 2  | 30 | 9 Periods | 2 Overlap | 2588.446 | 2439.665 | 0.0575 |
| H023008 | 2  | 30 | 9 Periods | 2 Overlap | 17680.49 | 16362.91 | 0.0449 |
| H023009 | 2  | 30 | 9 Periods | 2 Overlap | 4629.885 | 4606.195 | 0.0051 |
| H023010 | 2  | 30 | 9 Periods | 2 Overlap | 22577.72 | 22149.86 | 0.0121 |
| H063005 | 6  | 30 | 9 Periods | 2 Overlap | 195778.8 | 187741   | 0.0388 |
| H063006 | 6  | 30 | 9 Periods | 2 Overlap | 117925.4 | 112506.2 | 0.0459 |
| H063007 | 6  | 30 | 9 Periods | 2 Overlap | 126741.3 | 125007.8 | 0.0126 |
| H063008 | 6  | 30 | 9 Periods | 2 Overlap | 312996.6 | 280856.2 | 0.089  |
| H063009 | 6  | 30 | 9 Periods | 2 Overlap | 93987.86 | 90673.38 | 0.0329 |
| H063010 | 6  | 30 | 9 Periods | 2 Overlap | 275829.4 | 236095   | 0.1224 |
| H103005 | 10 | 30 | 9 Periods | 2 Overlap | 613619.6 | 536544.3 | 0.1256 |
| H103006 | 10 | 30 | 9 Periods | 2 Overlap | 435306   | 413009.5 | 0.0447 |
| H103007 | 10 | 30 | 9 Periods | 2 Overlap | 509588.3 | 440945.1 | 0.1208 |
| H103008 | 10 | 30 | 9 Periods | 2 Overlap | 359398.1 | 335075.8 | 0.0629 |
| H103009 | 10 | 30 | 9 Periods | 2 Overlap | 736545.3 | 671371.8 | 0.0868 |
| H103010 | 10 | 30 | 9 Periods | 2 Overlap | 406404.4 | 360416   | 0.1132 |
| H026005 | 2  | 60 | 9 Periods | 2 Overlap | 138262   | 133453.8 | 0.0237 |
| H026006 | 2  | 60 | 9 Periods | 2 Overlap | 111671.3 | 108405.7 | 0.0221 |
| H026007 | 2  | 60 | 9 Periods | 2 Overlap | 75574.84 | 73689.64 | 0.0233 |
| H026008 | 2  | 60 | 9 Periods | 2 Overlap | 192360.3 | 190050.5 | 0.0112 |
| H026009 | 2  | 60 | 9 Periods | 2 Overlap | 43956.85 | 42400.52 | 0.0228 |
| H026010 | 2  | 60 | 9 Periods | 2 Overlap | 116715.5 | 114519.3 | 0.0151 |
| H066005 | 6  | 60 | 9 Periods | 2 Overlap | 444006.8 | 368299.8 | 0.1645 |
| H066006 | 6  | 60 | 9 Periods | 2 Overlap | 367292.4 | 229002.4 | 0.3342 |
| H066007 | 6  | 60 | 9 Periods | 2 Overlap | 433090.7 | 314361.9 | 0.2462 |
| H066008 | 6  | 60 | 9 Periods | 2 Overlap | 210798.5 | 185818.6 | 0.1113 |
| H066009 | 6  | 60 | 9 Periods | 2 Overlap | 385867.1 | 332207.5 | 0.1233 |
| H066010 | 6  | 60 | 9 Periods | 2 Overlap | 368239.9 | 318870.3 | 0.1237 |
| H106005 | 10 | 60 | 9 Periods | 2 Overlap | 722735.4 | 586095.4 | 0.1696 |
| H106006 | 10 | 60 | 9 Periods | 2 Overlap | 459445   | 402653.9 | 0.1095 |
| H106007 | 10 | 60 | 9 Periods | 2 Overlap | 538264.3 | 437764.5 | 0.1826 |

|         |    |    |            |           |          |          |        |
|---------|----|----|------------|-----------|----------|----------|--------|
| H106008 | 10 | 60 | 9 Periods  | 2 Overlap | 784873.5 | 549239.7 | 0.2791 |
| H106009 | 10 | 60 | 9 Periods  | 2 Overlap | 8154979  | 525516.3 | 0.2126 |
| H106010 | 10 | 60 | 9 Periods  | 2 Overlap | 618299.4 | 293012   | 0.5095 |
| H021503 | 2  | 15 | 11 Periods | 2 Overlap | 12599.74 | 12593.42 | 0.0005 |
| H021504 | 2  | 15 | 11 Periods | 2 Overlap | 1971.178 | 1971.178 | 0      |
| H021505 | 2  | 15 | 11 Periods | 2 Overlap | 11972.81 | 11972.81 | 0      |
| H021506 | 2  | 15 | 11 Periods | 2 Overlap | 6941.4   | 6800.426 | 0.0013 |
| H021507 | 2  | 15 | 11 Periods | 2 Overlap | 2958.24  | 2958.24  | 0      |
| H021509 | 2  | 15 | 11 Periods | 2 Overlap | 3489.6   | 3489.6   | 0      |
| H021510 | 2  | 15 | 11 Periods | 2 Overlap | 7103.005 | 7103.005 | 0      |
| H061503 | 6  | 15 | 11 Periods | 2 Overlap | 160292.7 | 154324.9 | 0.0362 |
| H061504 | 6  | 15 | 11 Periods | 2 Overlap | 345807.3 | 331108.4 | 0.0416 |
| H061505 | 6  | 15 | 11 Periods | 2 Overlap | 84304.74 | 84304.74 | 0      |
| H061506 | 6  | 15 | 11 Periods | 2 Overlap | 363886.2 | 345411.2 | 0.047  |
| H061507 | 6  | 15 | 11 Periods | 2 Overlap | 128469.4 | 127261.7 | 0.0071 |
| H061508 | 6  | 15 | 11 Periods | 2 Overlap | 85916.35 | 78451.4  | 0.0596 |
| H061509 | 6  | 15 | 11 Periods | 2 Overlap | 315374.4 | 301000   | 0.0322 |
| H061510 | 6  | 15 | 11 Periods | 2 Overlap | 388299.8 | 377517   | 0.0272 |
| H101503 | 10 | 15 | 11 Periods | 2 Overlap | 389611.2 | 366612.8 | 0.0436 |
| H101504 | 10 | 15 | 11 Periods | 2 Overlap | 318622.7 | 309090.7 | 0.0261 |
| H101505 | 10 | 15 | 11 Periods | 2 Overlap | 499198.9 | 484183.2 | 0.0271 |
| H101506 | 10 | 15 | 11 Periods | 2 Overlap | 121861.3 | 117706.9 | 0.0264 |
| H101507 | 10 | 15 | 11 Periods | 2 Overlap | 452139.4 | 429744.7 | 0.041  |
| H101508 | 10 | 15 | 11 Periods | 2 Overlap | 242122.2 | 230952.4 | 0.0343 |
| H101509 | 10 | 15 | 11 Periods | 2 Overlap | 390898.1 | 380736.2 | 0.0249 |
| H101510 | 10 | 15 | 11 Periods | 2 Overlap | 308657.1 | 290412   | 0.0506 |
| H023005 | 2  | 30 | 11 Periods | 2 Overlap | 11159.96 | 11135.27 | 0.0022 |
| H023006 | 2  | 30 | 11 Periods | 2 Overlap | 17849.08 | 17010.76 | 0.0403 |
| H023007 | 2  | 30 | 11 Periods | 2 Overlap | 2588.446 | 2588.446 | 0      |
| H023008 | 2  | 30 | 11 Periods | 2 Overlap | 17132.39 | 16427.72 | 0.0411 |
| H023009 | 2  | 30 | 11 Periods | 2 Overlap | 4629.885 | 4586.584 | 0.0094 |

|         |    |    |            |           |          |          |        |
|---------|----|----|------------|-----------|----------|----------|--------|
| H023010 | 2  | 30 | 11 Periods | 2 Overlap | 22715.55 | 22148.76 | 0.0121 |
| H063005 | 6  | 30 | 11 Periods | 2 Overlap | 195759.8 | 185435.5 | 0.0506 |
| H063006 | 6  | 30 | 11 Periods | 2 Overlap | 119310.4 | 111947.3 | 0.0506 |
| H063007 | 6  | 30 | 11 Periods | 2 Overlap | 126653.9 | 124921.2 | 0.0133 |
| H063008 | 6  | 30 | 11 Periods | 2 Overlap | 308285.9 | 279862.3 | 0.0922 |
| H063009 | 6  | 30 | 11 Periods | 2 Overlap | 93757.58 | 89732.74 | 0.0429 |
| H063010 | 6  | 30 | 11 Periods | 2 Overlap | 274226.1 | 237657.2 | 0.1166 |
| H103005 | 10 | 30 | 11 Periods | 2 Overlap | 613788.8 | 554230.6 | 0.0968 |
| H103006 | 10 | 30 | 11 Periods | 2 Overlap | 432315.5 | 411785.9 | 0.0475 |
| H103007 | 10 | 30 | 11 Periods | 2 Overlap | 508728.2 | 449150.9 | 0.1045 |
| H103008 | 10 | 30 | 11 Periods | 2 Overlap | 360571.4 | 338628.8 | 0.053  |
| H103009 | 10 | 30 | 11 Periods | 2 Overlap | 735642.5 | 670032.1 | 0.0887 |
| H103010 | 10 | 30 | 11 Periods | 2 Overlap | 413790.6 | 356318.7 | 0.1232 |
| H026005 | 2  | 60 | 11 Periods | 2 Overlap | 138065.8 | 133763.8 | 0.0214 |
| H026006 | 2  | 60 | 11 Periods | 2 Overlap | 112114.2 | 108667.2 | 0.0198 |
| H026007 | 2  | 60 | 11 Periods | 2 Overlap | 75743.27 | 73911.36 | 0.0203 |
| H026008 | 2  | 60 | 11 Periods | 2 Overlap | 192832.1 | 190226.2 | 0.0103 |
| H026009 | 2  | 60 | 11 Periods | 2 Overlap | 43391.1  | 42526.43 | 0.0199 |
| H026010 | 2  | 60 | 11 Periods | 2 Overlap | 117161.6 | 114535.5 | 0.0149 |
| H066005 | 6  | 60 | 11 Periods | 2 Overlap | 447606.8 | 376837.2 | 0.1451 |
| H066006 | 6  | 60 | 11 Periods | 2 Overlap | 350801.2 | 228465.1 | 0.3357 |
| H066007 | 6  | 60 | 11 Periods | 2 Overlap | 427922   | 337251.1 | 0.1913 |
| H066008 | 6  | 60 | 11 Periods | 2 Overlap | 210264.8 | 192313.8 | 0.0803 |
| H066009 | 6  | 60 | 11 Periods | 2 Overlap | 381113.1 | 336693.6 | 0.1115 |
| H066010 | 6  | 60 | 11 Periods | 2 Overlap | 367774.5 | 312422.9 | 0.1414 |
| H106005 | 10 | 60 | 11 Periods | 2 Overlap | 705840.4 | 627670.8 | 0.1107 |
| H106006 | 10 | 60 | 11 Periods | 2 Overlap | 458258.3 | 402133.4 | 0.1107 |
| H106007 | 10 | 60 | 11 Periods | 2 Overlap | 545556.7 | 437998.3 | 0.1822 |
| H106008 | 10 | 60 | 11 Periods | 2 Overlap | 779388.9 | 613912.3 | 0.1942 |
| H106009 | 10 | 60 | 11 Periods | 2 Overlap | 693494.7 | 550706.6 | 0.1748 |
| H106010 | 10 | 60 | 11 Periods | 2 Overlap | 603698.3 | 531555.9 | 0.1102 |

|         |    |    |           |           |          |          |        |
|---------|----|----|-----------|-----------|----------|----------|--------|
| H021503 | 2  | 15 | 5 Periods | 3 Overlap | 12599.74 | 12593.42 | 0.0005 |
| H021504 | 2  | 15 | 5 Periods | 3 Overlap | 1971.178 | 1971.178 | 0      |
| H021505 | 2  | 15 | 5 Periods | 3 Overlap | 11972.81 | 11960.01 | 0.0011 |
| H021506 | 2  | 15 | 5 Periods | 3 Overlap | 6809     | 6797.569 | 0.0017 |
| H021507 | 2  | 15 | 5 Periods | 3 Overlap | 2958.24  | 2958.24  | 0      |
| H021508 | 2  | 15 | 5 Periods | 3 Overlap | 5360.767 | 5022.091 | 0.0109 |
| H021509 | 2  | 15 | 5 Periods | 3 Overlap | 3489.6   | 3489.6   | 0      |
| H021510 | 2  | 15 | 5 Periods | 3 Overlap | 7103.005 | 7005.407 | 0.0137 |
| H061503 | 6  | 15 | 5 Periods | 3 Overlap | 160539.4 | 149849   | 0.0642 |
| H061504 | 6  | 15 | 5 Periods | 3 Overlap | 353377.4 | 317217.3 | 0.0818 |
| H061505 | 6  | 15 | 5 Periods | 3 Overlap | 84800.85 | 80950.01 | 0.0398 |
| H061506 | 6  | 15 | 5 Periods | 3 Overlap | 362626.5 | 335718   | 0.0738 |
| H061508 | 6  | 15 | 5 Periods | 3 Overlap | 85423.69 | 73569.12 | 0.1181 |
| H061509 | 6  | 15 | 5 Periods | 3 Overlap | 313360.5 | 289957   | 0.0689 |
| H061510 | 6  | 15 | 5 Periods | 3 Overlap | 388089.9 | 368741.6 | 0.0498 |
| H101503 | 10 | 15 | 5 Periods | 3 Overlap | 383330.5 | 334011.7 | 0.1287 |
| H101504 | 10 | 15 | 5 Periods | 3 Overlap | 324335.7 | 279843.5 | 0.1183 |
| H101505 | 10 | 15 | 5 Periods | 3 Overlap | 499282.2 | 444893.2 | 0.1061 |
| H101506 | 10 | 15 | 5 Periods | 3 Overlap | 121376.1 | 102226.1 | 0.1544 |
| H101508 | 10 | 15 | 5 Periods | 3 Overlap | 239955.3 | 192690   | 0.1943 |
| H101509 | 10 | 15 | 5 Periods | 3 Overlap | 390443.5 | 345696.4 | 0.1146 |
| H101510 | 10 | 15 | 5 Periods | 3 Overlap | 316084.6 | 266578.1 | 0.1285 |
| H023005 | 2  | 30 | 5 Periods | 3 Overlap | 11170.11 | 10885.24 | 0.0246 |
| H023006 | 2  | 30 | 5 Periods | 3 Overlap | 18305.39 | 16767.36 | 0.054  |
| H023007 | 2  | 30 | 5 Periods | 3 Overlap | 2588.446 | 2417.154 | 0.0662 |
| H023008 | 2  | 30 | 5 Periods | 3 Overlap | 17332.79 | 16185.13 | 0.0553 |
| H023009 | 2  | 30 | 5 Periods | 3 Overlap | 4672.604 | 4550.357 | 0.0172 |
| H023010 | 2  | 30 | 5 Periods | 3 Overlap | 22568.52 | 22146.7  | 0.0122 |
| H063005 | 6  | 30 | 5 Periods | 3 Overlap | 195378.3 | 173285.3 | 0.1128 |
| H063007 | 6  | 30 | 5 Periods | 3 Overlap | 126599.5 | 123540.3 | 0.0242 |
| H063008 | 6  | 30 | 5 Periods | 3 Overlap | 313348   | 249374.1 | 0.1911 |

|         |    |    |           |           |          |          |        |
|---------|----|----|-----------|-----------|----------|----------|--------|
| H063009 | 6  | 30 | 5 Periods | 3 Overlap | 300460.6 | 72924.83 | 0.2222 |
| H063010 | 6  | 30 | 5 Periods | 3 Overlap | 277560.9 | 215400.8 | 0.1993 |
| H103005 | 10 | 30 | 5 Periods | 3 Overlap | 619268.6 | 392157   | 0.3609 |
| H103006 | 10 | 30 | 5 Periods | 3 Overlap | 481810.8 | 240641.8 | 0.4434 |
| H103007 | 10 | 30 | 5 Periods | 3 Overlap | 510270.1 | 235271.6 | 0.5309 |
| H103008 | 10 | 30 | 5 Periods | 3 Overlap | 374270.9 | 296327.5 | 0.1713 |
| H103010 | 10 | 30 | 5 Periods | 3 Overlap | 421695.3 | 172324.4 | 0.576  |
| H026005 | 2  | 60 | 5 Periods | 3 Overlap | 138220.6 | 133509.4 | 0.0233 |
| H026006 | 2  | 60 | 5 Periods | 3 Overlap | 111407.9 | 108225.3 | 0.0238 |
| H026007 | 2  | 60 | 5 Periods | 3 Overlap | 75444.92 | 73291.85 | 0.0285 |
| H026008 | 2  | 60 | 5 Periods | 3 Overlap | 193135.6 | 189967.9 | 0.0117 |
| H026009 | 2  | 60 | 5 Periods | 3 Overlap | 44654.13 | 42394.92 | 0.023  |
| H026010 | 2  | 60 | 5 Periods | 3 Overlap | 116864.2 | 114321.9 | 0.0168 |
| H066005 | 6  | 60 | 5 Periods | 3 Overlap | 468590   | 286780.2 | 0.3494 |
| H066006 | 6  | 60 | 5 Periods | 3 Overlap | 396161.3 | 181637.5 | 0.4719 |
| H066007 | 6  | 60 | 5 Periods | 3 Overlap | 490535   | 201115   | 0.5178 |
| H066008 | 6  | 60 | 5 Periods | 3 Overlap | 222814.2 | 99159.11 | 0.5258 |
| H066010 | 6  | 60 | 5 Periods | 3 Overlap | 385066.8 | 200385.6 | 0.4493 |
| H106005 | 10 | 60 | 5 Periods | 3 Overlap | 3688099  | 454754   | 0.3557 |
| H106006 | 10 | 60 | 5 Periods | 3 Overlap | 1764741  | 327465.4 | 0.2758 |
| H106007 | 10 | 60 | 5 Periods | 3 Overlap | 1413544  | 358329.2 | 0.3309 |
| H106009 | 10 | 60 | 5 Periods | 3 Overlap | 2708831  | 398131.6 | 0.4035 |
| H106010 | 10 | 60 | 5 Periods | 3 Overlap | 2313667  | 371584.8 | 0.378  |
| H021503 | 2  | 15 | 7 Periods | 3 Overlap | 12599.74 | 12593.42 | 0.0005 |
| H021504 | 2  | 15 | 7 Periods | 3 Overlap | 1970     | 1971.178 | 0      |
| H021505 | 2  | 15 | 7 Periods | 3 Overlap | 11972.81 | 11963.27 | 0.0008 |
| H021506 | 2  | 15 | 7 Periods | 3 Overlap | 6809     | 6808.203 | 0.0001 |
| H021507 | 2  | 15 | 7 Periods | 3 Overlap | 2960     | 2958.24  | 0      |
| H021509 | 2  | 15 | 7 Periods | 3 Overlap | 3490     | 3489.6   | 0      |
| H021510 | 2  | 15 | 7 Periods | 3 Overlap | 7103.005 | 7049.595 | 0.0075 |
| H061503 | 6  | 15 | 7 Periods | 3 Overlap | 160943.6 | 153386.3 | 0.0421 |

|         |    |    |           |           |          |          |        |
|---------|----|----|-----------|-----------|----------|----------|--------|
| H061504 | 6  | 15 | 7 Periods | 3 Overlap | 345700.9 | 328222.4 | 0.0499 |
| H061505 | 6  | 15 | 7 Periods | 3 Overlap | 84409.66 | 82564.52 | 0.0206 |
| H061506 | 6  | 15 | 7 Periods | 3 Overlap | 362451.1 | 349531.1 | 0.0356 |
| H061507 | 6  | 15 | 7 Periods | 3 Overlap | 128173.1 | 126000   | 0.0197 |
| H061508 | 6  | 15 | 7 Periods | 3 Overlap | 85800.05 | 76319.14 | 0.0851 |
| H061509 | 6  | 15 | 7 Periods | 3 Overlap | 312439.9 | 301490.8 | 0.0319 |
| H061510 | 6  | 15 | 7 Periods | 3 Overlap | 388139.3 | 378293.6 | 0.0252 |
| H101503 | 10 | 15 | 7 Periods | 3 Overlap | 1109634  | 358158.6 | 0.0657 |
| H101504 | 10 | 15 | 7 Periods | 3 Overlap | 318061.9 | 301330.5 | 0.0506 |
| H101505 | 10 | 15 | 7 Periods | 3 Overlap | 497682.6 | 476854.9 | 0.0418 |
| H101506 | 10 | 15 | 7 Periods | 3 Overlap | 121105.3 | 111000   | 0.0831 |
| H101507 | 10 | 15 | 7 Periods | 3 Overlap | 448161.1 | 422031.5 | 0.0582 |
| H101508 | 10 | 15 | 7 Periods | 3 Overlap | 240391.3 | 228773.4 | 0.0434 |
| H101509 | 10 | 15 | 7 Periods | 3 Overlap | 390936   | 372867.1 | 0.045  |
| H101510 | 10 | 15 | 7 Periods | 3 Overlap | 306332.4 | 283307.9 | 0.0739 |
| H023005 | 2  | 30 | 7 Periods | 3 Overlap | 11170.11 | 10900    | 0.0235 |
| H023006 | 2  | 30 | 7 Periods | 3 Overlap | 17725.19 | 16952.16 | 0.0436 |
| H023007 | 2  | 30 | 7 Periods | 3 Overlap | 2588.446 | 2465.141 | 0.0476 |
| H023008 | 2  | 30 | 7 Periods | 3 Overlap | 17563.89 | 16379.39 | 0.044  |
| H023009 | 2  | 30 | 7 Periods | 3 Overlap | 4629.885 | 4606.195 | 0.0051 |
| H023010 | 2  | 30 | 7 Periods | 3 Overlap | 22714.8  | 22147.67 | 0.0122 |
| H063005 | 6  | 30 | 7 Periods | 3 Overlap | 195571   | 184121   | 0.0574 |
| H063006 | 6  | 30 | 7 Periods | 3 Overlap | 119317.8 | 111419.6 | 0.0551 |
| H063007 | 6  | 30 | 7 Periods | 3 Overlap | 126645.7 | 124377.6 | 0.0176 |
| H063008 | 6  | 30 | 7 Periods | 3 Overlap | 311223.5 | 264480.8 | 0.1421 |
| H063009 | 6  | 30 | 7 Periods | 3 Overlap | 93907.66 | 87305.93 | 0.0688 |
| H063010 | 6  | 30 | 7 Periods | 3 Overlap | 269029.1 | 229418.3 | 0.1472 |
| H103005 | 10 | 30 | 7 Periods | 3 Overlap | 620736.4 | 475869.8 | 0.2245 |
| H103007 | 10 | 30 | 7 Periods | 3 Overlap | 508803.8 | 402229.6 | 0.198  |
| H103008 | 10 | 30 | 7 Periods | 3 Overlap | 359454.2 | 294995.3 | 0.175  |
| H103009 | 10 | 30 | 7 Periods | 3 Overlap | 736271.8 | 551313.8 | 0.2501 |

|         |    |    |           |           |          |          |        |
|---------|----|----|-----------|-----------|----------|----------|--------|
| H103010 | 10 | 30 | 7 Periods | 3 Overlap | 419781.7 | 325027.7 | 0.2002 |
| H026005 | 2  | 60 | 7 Periods | 3 Overlap | 137492.8 | 133794.3 | 0.0212 |
| H026006 | 2  | 60 | 7 Periods | 3 Overlap | 110922.7 | 108485.5 | 0.0214 |
| H026007 | 2  | 60 | 7 Periods | 3 Overlap | 75613.36 | 73570.72 | 0.0248 |
| H026008 | 2  | 60 | 7 Periods | 3 Overlap | 192815.9 | 190097.6 | 0.011  |
| H026009 | 2  | 60 | 7 Periods | 3 Overlap | 44117.13 | 42480.55 | 0.021  |
| H026010 | 2  | 60 | 7 Periods | 3 Overlap | 117012.9 | 114473.2 | 0.0154 |
| H066005 | 6  | 60 | 7 Periods | 3 Overlap | 440790   | 336530.1 | 0.2365 |
| H066006 | 6  | 60 | 7 Periods | 3 Overlap | 408736.1 | 179127.9 | 0.4792 |
| H066007 | 6  | 60 | 7 Periods | 3 Overlap | 458690.6 | 284408.7 | 0.318  |
| H066008 | 6  | 60 | 7 Periods | 3 Overlap | 209485.7 | 169018.2 | 0.1917 |
| H066009 | 6  | 60 | 7 Periods | 3 Overlap | 390507   | 312925.6 | 0.1742 |
| H066010 | 6  | 60 | 7 Periods | 3 Overlap | 383290.5 | 276809.7 | 0.2393 |
| H106005 | 10 | 60 | 7 Periods | 3 Overlap | 719013.7 | 487365.7 | 0.3095 |
| H106006 | 10 | 60 | 7 Periods | 3 Overlap | 489845   | 375866   | 0.1688 |
| H106007 | 10 | 60 | 7 Periods | 3 Overlap | 541756.3 | 445618.9 | 0.1679 |
| H106008 | 10 | 60 | 7 Periods | 3 Overlap | 798973   | 469993.6 | 0.3831 |
| H106009 | 10 | 60 | 7 Periods | 3 Overlap | 687330.1 | 459237.3 | 0.3119 |
| H106010 | 10 | 60 | 7 Periods | 3 Overlap | 625900.6 | 451969.5 | 0.2434 |
| H021503 | 2  | 15 | 9 Periods | 3 Overlap | 12600    | 12599.74 | 0      |
| H021504 | 2  | 15 | 9 Periods | 3 Overlap | 1970     | 1971.178 | 0      |
| H021505 | 2  | 15 | 9 Periods | 3 Overlap | 12000    | 11972.81 | 0      |
| H021506 | 2  | 15 | 9 Periods | 3 Overlap | 6810     | 6809     | 0      |
| H021507 | 2  | 15 | 9 Periods | 3 Overlap | 2960     | 2958.24  | 0      |
| H021508 | 2  | 15 | 9 Periods | 3 Overlap | 5360.767 | 5077.368 | 0      |
| H021509 | 2  | 15 | 9 Periods | 3 Overlap | 3490     | 3489.6   | 0      |
| H021510 | 2  | 15 | 9 Periods | 3 Overlap | 7103.005 | 7022.889 | 0.0113 |
| H061503 | 6  | 15 | 9 Periods | 3 Overlap | 161044.5 | 156979.4 | 0.0197 |
| H061504 | 6  | 15 | 9 Periods | 3 Overlap | 345700.9 | 336366.5 | 0.0264 |
| H061505 | 6  | 15 | 9 Periods | 3 Overlap | 84300    | 84304.74 | 0      |
| H061506 | 6  | 15 | 9 Periods | 3 Overlap | 363692.5 | 353798.9 | 0.0239 |

|         |    |    |           |           |          |          |        |
|---------|----|----|-----------|-----------|----------|----------|--------|
| H061507 | 6  | 15 | 9 Periods | 3 Overlap | 128306.6 | 126421.2 | 0.0137 |
| H061508 | 6  | 15 | 9 Periods | 3 Overlap | 85423.69 | 77950.69 | 0.0656 |
| H061509 | 6  | 15 | 9 Periods | 3 Overlap | 313371.6 | 306000   | 0.0179 |
| H061510 | 6  | 15 | 9 Periods | 3 Overlap | 388237.4 | 377954.9 | 0.0261 |
| H101503 | 10 | 15 | 9 Periods | 3 Overlap | 387347.4 | 358532.3 | 0.0647 |
| H101504 | 10 | 15 | 9 Periods | 3 Overlap | 318294.6 | 307210.7 | 0.0321 |
| H101505 | 10 | 15 | 9 Periods | 3 Overlap | 499436.5 | 477886.3 | 0.0398 |
| H101506 | 10 | 15 | 9 Periods | 3 Overlap | 121565.4 | 115890.1 | 0.0414 |
| H101507 | 10 | 15 | 9 Periods | 3 Overlap | 448692.5 | 426991.7 | 0.0471 |
| H101508 | 10 | 15 | 9 Periods | 3 Overlap | 242122.4 | 227903.2 | 0.0471 |
| H101509 | 10 | 15 | 9 Periods | 3 Overlap | 391115   | 379192.6 | 0.0288 |
| H101510 | 10 | 15 | 9 Periods | 3 Overlap | 305900.7 | 289701.4 | 0.053  |
| H023005 | 2  | 30 | 9 Periods | 3 Overlap | 11159.96 | 11052.14 | 0.0097 |
| H023006 | 2  | 30 | 9 Periods | 3 Overlap | 17815.96 | 17020.18 | 0.0398 |
| H023007 | 2  | 30 | 9 Periods | 3 Overlap | 2588.446 | 2494.6   | 0.0363 |
| H023008 | 2  | 30 | 9 Periods | 3 Overlap | 17132.39 | 16594.86 | 0.0314 |
| H023009 | 2  | 30 | 9 Periods | 3 Overlap | 4629.885 | 4606.195 | 0.0051 |
| H023010 | 2  | 30 | 9 Periods | 3 Overlap | 22516.4  | 22149.82 | 0.0121 |
| H063005 | 6  | 30 | 9 Periods | 3 Overlap | 195574.1 | 184299   | 0.0565 |
| H063006 | 6  | 30 | 9 Periods | 3 Overlap | 117914.4 | 111125.3 | 0.0576 |
| H063007 | 6  | 30 | 9 Periods | 3 Overlap | 126603.9 | 123827.1 | 0.0219 |
| H063008 | 6  | 30 | 9 Periods | 3 Overlap | 313990.8 | 270912.6 | 0.1212 |
| H063009 | 6  | 30 | 9 Periods | 3 Overlap | 93799.28 | 88214.58 | 0.0591 |
| H063010 | 6  | 30 | 9 Periods | 3 Overlap | 274493.5 | 231244.8 | 0.1404 |
| H103005 | 10 | 30 | 9 Periods | 3 Overlap | 628214.8 | 529566.6 | 0.137  |
| H103006 | 10 | 30 | 9 Periods | 3 Overlap | 436841   | 370542.5 | 0.1429 |
| H103007 | 10 | 30 | 9 Periods | 3 Overlap | 518184.3 | 439242   | 0.1242 |
| H103008 | 10 | 30 | 9 Periods | 3 Overlap | 360152.6 | 327471.4 | 0.0842 |
| H103009 | 10 | 30 | 9 Periods | 3 Overlap | 739415.3 | 645356.8 | 0.1222 |
| H103010 | 10 | 30 | 9 Periods | 3 Overlap | 426836.8 | 323017.6 | 0.2052 |
| H026005 | 2  | 60 | 9 Periods | 3 Overlap | 138262   | 133661.4 | 0.0222 |

|         |    |    |            |           |          |          |        |
|---------|----|----|------------|-----------|----------|----------|--------|
| H026006 | 2  | 60 | 9 Periods  | 3 Overlap | 110859.1 | 108593.4 | 0.0204 |
| H026007 | 2  | 60 | 9 Periods  | 3 Overlap | 76159.97 | 73736.68 | 0.0226 |
| H026008 | 2  | 60 | 9 Periods  | 3 Overlap | 192983.6 | 190166.6 | 0.0106 |
| H026009 | 2  | 60 | 9 Periods  | 3 Overlap | 43545.93 | 42548.91 | 0.0194 |
| H026010 | 2  | 60 | 9 Periods  | 3 Overlap | 116844.2 | 114559.8 | 0.0147 |
| H066005 | 6  | 60 | 9 Periods  | 3 Overlap | 446927.2 | 374981.6 | 0.1493 |
| H066006 | 6  | 60 | 9 Periods  | 3 Overlap | 392733.8 | 204392   | 0.4057 |
| H066007 | 6  | 60 | 9 Periods  | 3 Overlap | 453012.8 | 306101.7 | 0.266  |
| H066008 | 6  | 60 | 9 Periods  | 3 Overlap | 211903.1 | 175853.1 | 0.159  |
| H066009 | 6  | 60 | 9 Periods  | 3 Overlap | 394320.8 | 329452.5 | 0.1306 |
| H066010 | 6  | 60 | 9 Periods  | 3 Overlap | 368386   | 288835.2 | 0.2063 |
| H106005 | 10 | 60 | 9 Periods  | 3 Overlap | 711875.6 | 583250.8 | 0.1737 |
| H106007 | 10 | 60 | 9 Periods  | 3 Overlap | 560630   | 194508.5 | 0.6368 |
| H106008 | 10 | 60 | 9 Periods  | 3 Overlap | 797070.1 | 507141.4 | 0.3343 |
| H106010 | 10 | 60 | 9 Periods  | 3 Overlap | 615628.2 | 497911.5 | 0.1665 |
| H021503 | 2  | 15 | 11 Periods | 3 Overlap | 12599.74 | 12593.42 | 0.0005 |
| H021504 | 2  | 15 | 11 Periods | 3 Overlap | 1971.178 | 1971.178 | 0      |
| H021505 | 2  | 15 | 11 Periods | 3 Overlap | 11972.81 | 11972.81 | 0      |
| H021506 | 2  | 15 | 11 Periods | 3 Overlap | 6809     | 6809     | 0      |
| H021507 | 2  | 15 | 11 Periods | 3 Overlap | 2958.24  | 2958.24  | 0      |
| H021509 | 2  | 15 | 11 Periods | 3 Overlap | 3489.6   | 3489.6   | 0      |
| H021510 | 2  | 15 | 11 Periods | 3 Overlap | 7103.005 | 7103.005 | 0      |
| H061503 | 6  | 15 | 11 Periods | 3 Overlap | 160882.2 | 153917.8 | 0.0388 |
| H061504 | 6  | 15 | 11 Periods | 3 Overlap | 345472.7 | 329347.7 | 0.0467 |
| H061505 | 6  | 15 | 11 Periods | 3 Overlap | 84304.74 | 83747.27 | 0.0066 |
| H061506 | 6  | 15 | 11 Periods | 3 Overlap | 363322.1 | 346447.1 | 0.0442 |
| H061507 | 6  | 15 | 11 Periods | 3 Overlap | 128360.5 | 123893.7 | 0.0334 |
| H061508 | 6  | 15 | 11 Periods | 3 Overlap | 85785.91 | 77502.14 | 0.0709 |
| H061509 | 6  | 15 | 11 Periods | 3 Overlap | 316418.4 | 300873.1 | 0.0339 |
| H061510 | 6  | 15 | 11 Periods | 3 Overlap | 388250.5 | 376061.2 | 0.031  |
| H101503 | 10 | 15 | 11 Periods | 3 Overlap | 383355.8 | 365624.3 | 0.0462 |

|         |    |    |            |           |          |          |        |
|---------|----|----|------------|-----------|----------|----------|--------|
| H101504 | 10 | 15 | 11 Periods | 3 Overlap | 318108.6 | 308200.9 | 0.0289 |
| H101505 | 10 | 15 | 11 Periods | 3 Overlap | 499385.9 | 478270.8 | 0.039  |
| H101506 | 10 | 15 | 11 Periods | 3 Overlap | 121632.1 | 117653.8 | 0.0268 |
| H101507 | 10 | 15 | 11 Periods | 3 Overlap | 459153.8 | 426780.3 | 0.0476 |
| H101508 | 10 | 15 | 11 Periods | 3 Overlap | 240505.3 | 230933.7 | 0.0344 |
| H101509 | 10 | 15 | 11 Periods | 3 Overlap | 393140.4 | 376694.9 | 0.0352 |
| H101510 | 10 | 15 | 11 Periods | 3 Overlap | 309975.1 | 290817.4 | 0.0493 |
| H023005 | 2  | 30 | 11 Periods | 3 Overlap | 11159.96 | 11135.27 | 0.0022 |
| H023006 | 2  | 30 | 11 Periods | 3 Overlap | 17815.96 | 17036.57 | 0.0389 |
| H023007 | 2  | 30 | 11 Periods | 3 Overlap | 2588.446 | 2588.446 | 0      |
| H023008 | 2  | 30 | 11 Periods | 3 Overlap | 17132.39 | 16518.83 | 0.0358 |
| H023009 | 2  | 30 | 11 Periods | 3 Overlap | 4629.885 | 4610     | 0.0051 |
| H023010 | 2  | 30 | 11 Periods | 3 Overlap | 22714.8  | 22148.09 | 0.0121 |
| H063005 | 6  | 30 | 11 Periods | 3 Overlap | 195432.3 | 188000   | 0.0361 |
| H063006 | 6  | 30 | 11 Periods | 3 Overlap | 118544   | 112166.1 | 0.0487 |
| H063007 | 6  | 30 | 11 Periods | 3 Overlap | 127009.1 | 123746.6 | 0.0225 |
| H063008 | 6  | 30 | 11 Periods | 3 Overlap | 311100.2 | 269658.2 | 0.1253 |
| H063009 | 6  | 30 | 11 Periods | 3 Overlap | 94276.16 | 88165.16 | 0.0596 |
| H063010 | 6  | 30 | 11 Periods | 3 Overlap | 274426.4 | 227105.2 | 0.1558 |
| H103005 | 10 | 30 | 11 Periods | 3 Overlap | 625471   | 525742.9 | 0.1432 |
| H103006 | 10 | 30 | 11 Periods | 3 Overlap | 440197   | 413740.4 | 0.043  |
| H103007 | 10 | 30 | 11 Periods | 3 Overlap | 506719.6 | 458572.6 | 0.0857 |
| H103008 | 10 | 30 | 11 Periods | 3 Overlap | 360455.9 | 333037.6 | 0.0686 |
| H103009 | 10 | 30 | 11 Periods | 3 Overlap | 735225.4 | 672938.3 | 0.0847 |
| H103010 | 10 | 30 | 11 Periods | 3 Overlap | 414265.4 | 344550   | 0.1522 |
| H026005 | 2  | 60 | 11 Periods | 3 Overlap | 137869.6 | 134035.3 | 0.0194 |
| H026006 | 2  | 60 | 11 Periods | 3 Overlap | 111364.9 | 108724.3 | 0.0193 |
| H026007 | 2  | 60 | 11 Periods | 3 Overlap | 75743.27 | 73815.34 | 0.0216 |
| H026008 | 2  | 60 | 11 Periods | 3 Overlap | 192368   | 190283.4 | 0.01   |
| H026009 | 2  | 60 | 11 Periods | 3 Overlap | 43391.1  | 42664.47 | 0.0167 |
| H026010 | 2  | 60 | 11 Periods | 3 Overlap | 116715.5 | 114628.8 | 0.0141 |

|         |    |    |            |           |          |          |        |
|---------|----|----|------------|-----------|----------|----------|--------|
| H066005 | 6  | 60 | 11 Periods | 3 Overlap | 444536.8 | 366556.5 | 0.1684 |
| H066006 | 6  | 60 | 11 Periods | 3 Overlap | 385714.9 | 196675.1 | 0.4281 |
| H066007 | 6  | 60 | 11 Periods | 3 Overlap | 461979.6 | 318232.9 | 0.2369 |
| H066008 | 6  | 60 | 11 Periods | 3 Overlap | 210886.7 | 188741   | 0.0974 |
| H066009 | 6  | 60 | 11 Periods | 3 Overlap | 384637.6 | 332257.7 | 0.1232 |
| H106006 | 10 | 60 | 11 Periods | 3 Overlap | 452310.5 | 270743.9 | 0.4012 |
| H106007 | 10 | 60 | 11 Periods | 3 Overlap | 541135.6 | 475879.4 | 0.1114 |
| H106010 | 10 | 60 | 11 Periods | 3 Overlap | 608121.4 | 511284   | 0.1442 |

Table B.2 shows the detailed computational results for the Süral heterogeneous and table B.3 for the homogeneous instances respectively.

Table B.2: Heterogeneous instances. Time limit is 150 seconds. A dash (-) denotes zero gap. Gap is expressed (%).

| Instance | $ L $ | $ H $ | LB Hor   | UB Hor | Gap Hor | LB Süral | UB Süral | Gap Süral | Gap LB Hor | Gap LB Süral |
|----------|-------|-------|----------|--------|---------|----------|----------|-----------|------------|--------------|
| G51      | 0     | 10    | 3606.53  | 3766   | 4.42    | 3449.05  | 4082     | 18.35     | 2.15       | 6.81         |
| G52      | 0     | 10    | 1715.69  | 1849   | 7.77    | 1401.93  | 1773     | 26.47     | 3.34       | 26.47        |
| G53      | 0     | 10    | 2068.26  | 2228   | 7.72    | 1831.31  | 2251     | 22.92     | 4.87       | 18.44        |
| G54      | 0     | 10    | 2153.35  | 2163   | 0.45    | 1784.36  | 2209     | 23.8      | 0.45       | 21.22        |
| G55      | 0     | 10    | 5129.41  | 5269   | 2.72    | 4830.13  | 5419     | 12.19     | 2.72       | 9.09         |
| G56      | 0     | 10    | 5352.5   | 5734   | 7.13    | 5242.59  | 5846     | 11.51     | 4.38       | 6.56         |
| G57      | 0     | 10    | 4140.73  | 4782   | 15.49   | 4180.63  | 4603     | 10.1      | 10.74      | 9.68         |
| G58      | 0     | 10    | 6879.69  | 7404   | 7.62    | 7046.94  | 7528     | 6.83      | 6.41       | 3.88         |
| G59      | 0     | 10    | 9391.35  | 10173  | 8.32    | 9688.37  | 10583    | 9.23      | 6.11       | 2.86         |
| G60      | 0     | 10    | 8180.85  | 8785   | 7.38    | 8264.44  | 9149     | 10.7      | 3.81       | 2.76         |
| G66      | 0     | 15    | 5488.11  | 6506   | 18.55   | 5439.44  | 6553     | 20.47     | 13.21      | 14.22        |
| G67      | 0     | 15    | 7591.82  | 8887   | 17.06   | 6902.64  | 10207    | 47.87     | 13.42      | 24.75        |
| G68      | 0     | 15    | 15974.7  | 17996  | 12.65   | 16082.92 | 18639    | 15.89     | 11.65      | 10.89        |
| G69      | 0     | 15    | 3383.81  | 4260   | 25.89   | 3124.61  | 4325     | 38.42     | 21.89      | 32           |
| G70      | 0     | 15    | 12375.46 | 14769  | 19.34   | 12243.5  | 14784    | 20.75     | 16.51      | 17.77        |
| G71      | 0     | 15    | 2819.11  | 4006   | 42.1    | 2811.27  | 3895     | 38.55     | 35.48      | 35.86        |

|         |   |    |          |       |       |          |       |       |       |       |
|---------|---|----|----------|-------|-------|----------|-------|-------|-------|-------|
| G72     | 0 | 15 | 1409.14  | 1740  | 23.48 | 941.62   | 1726  | 83.3  | 22.34 | 83.09 |
| G73     | 0 | 15 | 19018.83 | 21052 | 10.69 | 19477.68 | 21713 | 11.48 | 7.64  | 5.1   |
| G74     | 0 | 15 | 4781.48  | 6126  | 28.12 | 4954.18  | 5867  | 18.43 | 22.7  | 18.43 |
| G75     | 0 | 15 | 19244.61 | 23002 | 19.52 | 20572.57 | 22629 | 10    | 12.77 | 5.49  |
| MG51_T  | 0 | 5  | 1417.11  | 1458  | 2.89  | 1329.09  | 1441  | 8.42  | 1.69  | 8.42  |
| MG52_T  | 0 | 5  | 737.52   | 761   | 3.18  | 601.39   | 761   | 26.54 | 3.18  | 26.54 |
| MG53_T  | 0 | 5  | 813.65   | 828   | 1.76  | 709.21   | 872   | 22.95 | 1.76  | 16.75 |
| MG54_T  | 0 | 5  | 424      | 424   | -     | 302.42   | 424   | 40.2  | -     | 40.2  |
| MG55_T  | 0 | 5  | 1914.91  | 1926  | 0.58  | 1798.22  | 1960  | 9     | 0.58  | 7.11  |
| MG56_T  | 0 | 5  | 1179.15  | 1183  | 0.33  | 1045.6   | 1183  | 13.14 | 0.33  | 13.14 |
| MG57_T  | 0 | 5  | 2052.24  | 2120  | 3.3   | 2017.78  | 2124  | 5.26  | 3.3   | 5.07  |
| MG58_T  | 0 | 5  | 2849.53  | 2894  | 1.56  | 2773.5   | 2926  | 5.5   | 1.56  | 4.34  |
| MG59_T  | 0 | 5  | 3199.45  | 3231  | 0.99  | 3140.19  | 3323  | 5.82  | 0.99  | 2.89  |
| MG60_T  | 0 | 5  | 2630.94  | 2725  | 3.58  | 2569.31  | 2867  | 11.59 | 3.58  | 6.06  |
| MG66_T  | 0 | 5  | 1049.08  | 1063  | 1.33  | 957.34   | 1063  | 11.04 | 1.33  | 11.04 |
| MG67_T  | 0 | 5  | 483.77   | 486   | 0.46  | 372.32   | 486   | 30.53 | 0.46  | 30.53 |
| MG68_T  | 0 | 5  | 1485.78  | 1508  | 1.5   | 1252.51  | 1734  | 38.44 | 1.5   | 20.4  |
| MG69_T  | 0 | 5  | 178.61   | 189   | 5.82  | 91.13    | 189   | 107.4 | 5.82  | 107.4 |
| MG70_T  | 0 | 5  | 1987.86  | 2009  | 1.06  | 1694.85  | 2081  | 22.78 | 1.06  | 18.54 |
| MG71_T  | 0 | 5  | 815      | 815   | -     | 677.68   | 847   | 24.99 | -     | 20.26 |
| MG72_T  | 0 | 5  | 360.12   | 383   | 6.35  | 205.49   | 376   | 82.98 | 4.41  | 82.98 |
| MG73_T  | 0 | 5  | 2617.5   | 2651  | 1.28  | 2615.37  | 2727  | 4.27  | 1.28  | 1.36  |
| MG74_T  | 0 | 5  | 977.28   | 1000  | 2.33  | 849.12   | 988   | 16.36 | 1.1   | 16.36 |
| MG75_T  | 0 | 5  | 2180.38  | 2239  | 2.69  | 2036.82  | 2257  | 10.81 | 2.14  | 9.34  |
| MG66_TT | 0 | 10 | 1672.1   | 1744  | 4.3   | 1481.89  | 1733  | 16.95 | 3.64  | 16.95 |
| MG67_TT | 0 | 10 | 2833.27  | 2947  | 4.01  | 2116.42  | 3120  | 47.42 | 3.38  | 38.39 |
| MG68_TT | 0 | 10 | 4951.74  | 5437  | 9.8   | 4874.78  | 5608  | 15.04 | 9.27  | -     |
| MG69_TT | 0 | 10 | 891      | 973   | 9.2   | 621.84   | 971   | 56.15 | 8.98  | 56.15 |
| MG70_TT | 0 | 10 | 5237.82  | 5385  | 2.81  | 4676.88  | 5623  | 20.23 | 2.81  | 15.14 |
| MG71_TT | 0 | 10 | 1000.74  | 1056  | 5.52  | 802.96   | 1064  | 32.51 | 5.52  | 31.51 |
| MG72_TT | 0 | 10 | 694.24   | 748   | 7.74  | 369.65   | 743   | 101   | 7.02  | 101   |

|         |   |    |         |      |       |         |      |       |      |       |
|---------|---|----|---------|------|-------|---------|------|-------|------|-------|
| MG73_TT | 0 | 10 | 6493.62 | 7004 | 7.86  | 6637.33 | 7032 | 5.95  | 6.8  | 4.48  |
| MG74_TT | 0 | 10 | 2385.02 | 2652 | 11.19 | 2272.61 | 2632 | 15.81 | 9.59 | 15.01 |
| MG75_TT | 0 | 10 | 5932.89 | 6287 | 5.97  | 5887.75 | 6415 | 8.96  | 4.58 | 5.38  |

Table B.3: Heterogeneous instances. Time limit is 150 seconds. A dash (-) denotes zero gap. Gap is expressed (%).

| Instance | $ L $ | $ H $ | LB Hor  | UB Hor | Gap Hor | LB Süral | UB Süral | Gap Süral | Gap LB Hor | Gap LB Süral |
|----------|-------|-------|---------|--------|---------|----------|----------|-----------|------------|--------------|
| G51      | 0     | 10    | 1964.22 | 2251   | 14.6    | 154.22   | 1774     | 2151      | 21.25      | 2151         |
| G52      | 0     | 10    | 1446.24 | 1618   | 11.88   | 155.21   | 1215     | 1599      | 31.59      | 1599         |
| G53      | 0     | 10    | 1326.06 | 1490   | 12.36   | 150.56   | 1133     | 1486      | 31.14      | 1473         |
| G54      | 0     | 10    | 1035.74 | 1050   | 1.38    | 43.36    | 736      | 1050      | 42.69      | 1050         |
| G55      | 0     | 10    | 2943.21 | 3425   | 16.37   | 151.42   | 2840     | 3126      | 10.06      | 3097         |
| G56      | 0     | 10    | 2466.9  | 2604   | 5.56    | 151.84   | 2426     | 2605      | 7.4        | 2600         |
| G57      | 0     | 10    | 3246.12 | 3740   | 15.21   | 151.62   | 3232     | 3514      | 8.71       | 3502         |
| G58      | 0     | 10    | 4123.52 | 4517   | 9.54    | 150.75   | 4134     | 4344      | 5.07       | 4293         |
| G59      | 0     | 10    | 4538.71 | 4869   | 7.28    | 151.07   | 4622     | 4867      | 5.3        | 4852         |
| G60      | 0     | 10    | 3681.79 | 3994   | 8.48    | 150.07   | 3687     | 4018      | 8.97       | 3992         |
| G66      | 0     | 15    | 3506.04 | 4517   | 28.83   | 152.3    | 3415     | 4304      | 26.02      | 4306         |
| G67      | 0     | 15    | 3740.1  | 4492   | 20.1    | 150.33   | 3698     | 4404      | 19.11      | 4378         |
| G68      | 0     | 15    | 7322.19 | 8358   | 14.15   | 151.57   | 7285     | 8368      | 14.86      | 8097         |
| G69      | 0     | 15    | 2395.38 | 3075   | 28.37   | 154.85   | 2166     | 2978      | 37.46      | 2919         |
| G70      | 0     | 15    | 3942.35 | 4877   | 23.71   | 150.19   | 3847     | 4778      | 24.19      | 4754         |
| G71      | 0     | 15    | 1898.11 | 3924   | 106.73  | 151.02   | 1919     | 2620      | 36.51      | 2620         |
| G72      | 0     | 15    | 1143.92 | 1637   | 43.1    | 152.44   | 888      | 1619      | 82.34      | 1619         |
| G73      | 0     | 15    | 9047.39 | 11734  | 29.69   | 150.14   | 9448     | 10088     | 6.78       | 10100        |
| G74      | 0     | 15    | 3863.69 | 6657   | 72.3    | 150.84   | 3930     | 4728      | 20.31      | 4663         |
| G75      | 0     | 15    | 9675.9  | 10974  | 13.42   | 150.87   | 9971     | 10608     | 6.39       | 10545        |
| MG51_T   | 0     | 5     | 1028.1  | 1053   | 2.42    | 70.83    | 877      | 1049      | 19.56      | 1049         |
| MG52_T   | 0     | 5     | 649.76  | 676    | 4.04    | 47.75    | 554      | 676       | 22.09      | 676          |
| MG53_T   | 0     | 5     | 656.37  | 670    | 2.08    | 72.16    | 518      | 663       | 28.08      | 663          |

|         |   |    |         |      |       |        |      |      |        |          |
|---------|---|----|---------|------|-------|--------|------|------|--------|----------|
| MG54_T  | 0 | 5  | 356.03  | 384  | 7.86  | 20.58  | 179  | 363  | 102.47 | 363      |
| MG55_T  | 0 | 5  | 1344.9  | 1409 | 4.77  | 150.01 | 1255 | 1396 | 11.25  | 1380     |
| MG56_T  | 0 | 5  | 692.52  | 788  | 13.79 | 150.1  | 600  | 770  | 28.36  | 770      |
| MG57_T  | 0 | 5  | 1720.53 | 1807 | 5.03  | 151.9  | 1686 | 1758 | 4.28   | 1758     |
| MG58_T  | 0 | 5  | 1913.55 | 2160 | 12.88 | 150.38 | 1935 | 2035 | 5.14   | 2035     |
| MG59_T  | 0 | 5  | 1912.9  | 2014 | 5.29  | 150.8  | 1858 | 1990 | 7.09   | 1990     |
| MG60_T  | 0 | 5  | 1441.96 | 1502 | 4.16  | 150.45 | 1386 | 1512 | 9.1    | 1490     |
| MG66_T  | 0 | 5  | 834.37  | 845  | 1.27  | 80.1   | 741  | 845  | 14.1   | 845      |
| MG67_T  | 0 | 5  | 464.25  | 480  | 3.39  | 11.83  | 350  | 480  | 37.08  | 480      |
| MG68_T  | 0 | 5  | 905.8   | 918  | 1.35  | 150.39 | 749  | 929  | 24.1   | 922      |
| MG69_T  | 0 | 5  | 173.6   | 186  | 7.14  | 5.5    | 77   | 186  | 140.06 | 186      |
| MG70_T  | 0 | 5  | 781.17  | 791  | 1.26  | 113.69 | 652  | 795  | 22     | 795      |
| MG71_T  | 0 | 5  | 660.59  | 701  | 6.12  | 150.93 | 572  | 701  | 22.45  | 701      |
| MG72_T  | 0 | 5  | 345.56  | 374  | 8.23  | 90.94  | 200  | 367  | 83.23  | 367      |
| MG73_T  | 0 | 5  | 1652.1  | 1799 | 8.89  | 150.94 | 1604 | 1846 | 15.1   | 1772     |
| MG74_T  | 0 | 5  | 790     | 866  | 9.62  | 150.54 | 738  | 860  | 16.46  | 860      |
| MG75_T  | 0 | 5  | 1477.27 | 1638 | 10.88 | 151.02 | 1385 | 1628 | 17.59  | 1628     |
| MG66_TT | 0 | 10 | 1301.9  | 1403 | 7.77  | 161.19 | 1066 | 1342 | 25.84  | 1342     |
| MG67_TT | 0 | 10 | 1653.42 | 1835 | 10.98 | 151.47 | 1488 | 1831 | 23.08  | 1805     |
| MG68_TT | 0 | 10 | 2498.96 | 2644 | 5.8   | 150.92 | 2394 | 2744 | 14.64  | 2650     |
| MG69_TT | 0 | 10 | 778.8   | 833  | 6.96  | 140.43 | 504  | 833  | 65.4   | 827      |
| MG70_TT | 0 | 10 | 1685.36 | 1798 | 6.68  | 151.39 | 1544 | 1764 | 14.28  | 1752     |
| MG71_TT | 0 | 10 | 773.72  | 891  | 15.16 | 150.49 | 669  | 891  | 33.2   | 891      |
| MG72_TT | 0 | 10 | 630.06  | 732  | 16.18 | 150.34 | 353  | 711  | 101.16 | 711      |
| MG73_TT | 0 | 10 | 3578.42 | 3850 | 7.59  | 151.42 | 3592 | 3886 | 8.19   | 3841     |
| MG74_TT | 0 | 10 | 1887.98 | 2318 | 22.78 | 150.74 | 1844 | 2192 | 18.9   | 2142     |
| MG75_TT | 0 | 10 | 3438.51 | 3990 | 16.04 | 150.27 | 3386 | 3680 | 8.7    | 3,656.00 |

Table B.4 shows the detailed computational results for the heterogeneous Müller et al. (2012) instances, and table B.5 for the homogeneous instances respectively.

Table B.4: Heterogeneous instances.

| Instance | ALNS    |       |       | HorDec   |       |       | HorDec600 |       |        |
|----------|---------|-------|-------|----------|-------|-------|-----------|-------|--------|
|          | LB      | UB    | Gap   | LB       | UB    | Gap   | LB600     | UB600 | Gap600 |
| G51-30   | 7103.5  | 7368  | 3.72  | 7363.05  | 7368  | 0.07  | 7363.38   | 7368  | 0.06   |
| G51-45   | 10635   | 11052 | 3.92  | 10938.62 | 11088 | 1.37  | 10985.47  | 11052 | 0.61   |
| G52-30   | 2943.7  | 3546  | 20.46 | 3443.85  | 3546  | 2.97  | 3541.09   | 3546  | 0.14   |
| G52-45   | 4393.5  | 5344  | 21.64 | 4847.24  | 5411  | 11.63 | 4900.68   | 5411  | 10.41  |
| G53-30   | 3787.4  | 4351  | 14.88 | 4138.14  | 4342  | 4.93  | 4236.62   | 4338  | 2.39   |
| G53-45   | 5678.9  | 6558  | 15.48 | 6047.86  | 6657  | 10.07 | 6151.24   | 6593  | 7.18   |
| G54-30   | 4222    | 4366  | 3.41  | 4366     | 4366  | 0     | 4366      | 4366  | 0      |
| G54-45   | 6302.4  | 6549  | 3.91  | 6549     | 6549  | 0     | 6549      | 6549  | 0      |
| G55-30   | 9893    | 10640 | 7.55  | 10423.97 | 10588 | 1.57  | 10550.16  | 10588 | 0.36   |
| G55-45   | 14783   | 16171 | 9.39  | 15383.92 | 15927 | 3.53  | 15411.56  | 15916 | 3.27   |
| G56-30   | 10568.8 | 11278 | 6.71  | 10684.61 | 11412 | 6.81  | 10940.35  | 11274 | 3.05   |
| G56-45   | 15797.3 | 16939 | 7.22  | 15552.96 | 17243 | 10.87 | 16240.48  | 17191 | 5.85   |
| G57-30   | 8447.5  | 9217  | 9.11  | 8255.37  | 9196  | 11.39 | 8510.59   | 9214  | 8.27   |
| G57-45   | 12628   | 13854 | 9.71  | 12765.47 | 14126 | 10.66 | 12787.19  | 13916 | 8.83   |
| G58-30   | 14149.3 | 14681 | 3.76  | 13900.86 | 14712 | 5.84  | 14094.66  | 14699 | 4.29   |
| G58-45   | 21211.7 | 22162 | 4.48  | 21396.23 | 22068 | 3.14  | 21403.22  | 22053 | 3.04   |
| G59-30   | 19337.8 | 20282 | 4.88  | 18738.7  | 20309 | 8.38  | 18738.7   | 20125 | 7.4    |
| G59-45   | 28997.8 | 30910 | 6.59  | 29274.85 | 31267 | 6.8   | 29348.4   | 30286 | 3.19   |
| G60-30   | 16571.2 | 17045 | 2.86  | 16267.9  | 17260 | 6.1   | 16267.9   | 17099 | 5.11   |
| G60-45   | 24849.9 | 25931 | 4.35  | 24929.99 | 25897 | 3.88  | 24950.14  | 25794 | 3.38   |
| G66-60   | 10913.7 | 12672 | 16.11 | 11139.24 | 12586 | 12.99 | 11216.53  | 12586 | 12.21  |
| G66-90   | 16355.9 | 19261 | 17.76 | 16562.66 | 19823 | 19.68 | 16949.33  | 18977 | 11.96  |
| G67-60   | 13951.8 | 18039 | 29.29 | 15470.5  | 17249 | 11.5  | 15577.17  | 17249 | 10.73  |
| G67-90   | 20797   | 27224 | 30.9  | 22921.32 | 26026 | 13.54 | 23182.35  | 25996 | 12.14  |
| G68-60   | 32375.6 | 36316 | 12.17 | 32634.35 | 36152 | 10.78 | 32774.96  | 35792 | 9.21   |
| G68-90   | 48475.4 | 54951 | 13.36 | 46870.22 | 54936 | 17.21 | 48961.37  | 53942 | 10.17  |
| G69-60   | 6423.7  | 8302  | 29.24 | 7138.02  | 8540  | 19.64 | 7191.12   | 8540  | 18.76  |

|        |         |       |       |          |       |       |          |       |       |
|--------|---------|-------|-------|----------|-------|-------|----------|-------|-------|
| G69-90 | 9654.3  | 12577 | 30.28 | 10675.79 | 12793 | 19.83 | 10891.77 | 12793 | 17.46 |
| G70-60 | 24925.5 | 29187 | 17.1  | 25877.44 | 29507 | 14.03 | 26103.45 | 29319 | 12.32 |
| G70-90 | 37389.5 | 45072 | 20.55 | 38309.81 | 44468 | 16.07 | 38753.6  | 44182 | 14.01 |
| G71-60 | 5808.3  | 7769  | 33.76 | 6010.3   | 8281  | 37.78 | 6020.79  | 8243  | 36.91 |
| G71-90 | 8740.7  | 12076 | 38.16 | 9021     | 12255 | 35.85 | 9039.67  | 12114 | 34.01 |
| G72-60 | 2484.1  | 3501  | 40.95 | 2482.97  | 3631  | 46.24 | 2482.97  | 3631  | 46.24 |
| G72-90 | 3667.3  | 5565  | 51.75 | 3691.85  | 5504  | 49.09 | 4006.5   | 5294  | 32.14 |
| G73-60 | 38992.7 | 41591 | 6.66  | 39085.77 | 42065 | 7.62  | 39190.32 | 41671 | 6.33  |
| G73-90 | 58468.4 | 63193 | 8.08  | 58614.2  | 63041 | 7.55  | 58693.28 | 62280 | 6.11  |
| G74-60 | 9985    | 12115 | 21.33 | 10084.54 | 12330 | 22.27 | 10210.01 | 12182 | 19.31 |
| G74-90 | 14995.2 | 18474 | 23.2  | 15123.6  | 18766 | 24.08 | 15127.6  | 18473 | 22.11 |
| G75-60 | 41221.6 | 44762 | 8.59  | 41417.71 | 44671 | 7.85  | 41482.03 | 43780 | 5.54  |
| G75-90 | 61823.9 | 67229 | 8.74  | 61970.82 | 68936 | 11.24 | 62202.37 | 66902 | 7.56  |

Table B.5: Homogeneous instances.

| Instance | ALNS   |      |      | HorDec |      |      | HorDec600 |       |        |
|----------|--------|------|------|--------|------|------|-----------|-------|--------|
|          | LB     | UB   | Gap  | LB     | UB   | Gap  | LB600     | UB600 | Gap600 |
| G51-30   | 3633.4 | 4304 | 0.18 | 112.75 | 4209 | 4524 | 0.07      | 4271  | 4524   |
| G51-45   | 5422   | 6484 | 0.2  | 271.69 | 6141 | 6862 | 0.12      | 6237  | 6842   |
| G52-30   | 2514.7 | 3198 | 0.27 | 21.81  | 2738 | 3207 | 0.17      | 2794  | 3198   |
| G52-45   | 3734.3 | 4797 | 0.28 | 101.89 | 4013 | 4853 | 0.21      | 4049  | 4807   |
| G53-30   | 2382.1 | 2968 | 0.25 | 72.85  | 2570 | 2946 | 0.15      | 2661  | 2946   |
| G53-45   | 3549.5 | 4457 | 0.26 | 99.35  | 3896 | 4563 | 0.17      | 3924  | 4458   |
| G54-30   | 1632.6 | 2100 | 0.29 | 11.86  | 1908 | 2100 | 0.1       | 2064  | 2100   |
| G54-45   | 2388.5 | 3150 | 0.32 | 9.1    | 3026 | 3150 | 0.04      | 3035  | 3150   |
| G55-30   | 5723.2 | 6228 | 0.09 | 180.04 | 5942 | 6283 | 0.06      | 5987  | 6262   |
| G55-45   | 8553.1 | 9369 | 0.1  | 232.26 | 8727 | 9342 | 0.07      | 8775  | 9342   |
| G56-30   | 4894.5 | 5218 | 0.07 | 174.58 | 4839 | 5203 | 0.08      | 4892  | 5203   |
| G56-45   | 7324.8 | 7870 | 0.07 | 264.74 | 7400 | 7872 | 0.06      | 7423  | 7861   |
| G57-30   | 6508.3 | 7055 | 0.08 | 238.69 | 6490 | 7075 | 0.09      | 6605  | 7062   |

|        |         |       |      |        |       |       |      |       |       |
|--------|---------|-------|------|--------|-------|-------|------|-------|-------|
| G57-45 | 9756.4  | 10655 | 0.09 | 291.79 | 9870  | 10686 | 0.08 | 9888  | 10671 |
| G58-30 | 8306    | 8609  | 0.04 | 195.35 | 8151  | 8622  | 0.06 | 8313  | 8604  |
| G58-45 | 12452.2 | 12984 | 0.04 | 277.81 | 12503 | 12963 | 0.04 | 12512 | 12963 |
| G59-30 | 9271.4  | 9808  | 0.06 | 279.66 | 9318  | 9876  | 0.06 | 9318  | 9828  |
| G59-45 | 13908.4 | 14902 | 0.07 | 288.31 | 13967 | 14872 | 0.06 | 13986 | 14872 |
| G60-30 | 7399.9  | 8017  | 0.08 | 221.78 | 7421  | 8104  | 0.09 | 7481  | 8147  |
| G60-45 | 11094.1 | 12097 | 0.09 | 291.33 | 11182 | 12137 | 0.09 | 11191 | 12137 |
| G66-60 | 6870.8  | 8805  | 0.28 | 255.16 | 7132  | 8748  | 0.23 | 7243  | 8709  |
| G66-90 | 10314.6 | 13347 | 0.29 | 266.6  | 10542 | 13144 | 0.25 | 10543 | 13120 |
| G67-60 | 7497.2  | 8862  | 0.18 | 285.74 | 7711  | 9038  | 0.17 | 7778  | 9038  |
| G67-90 | 11242.4 | 13571 | 0.21 | 285.79 | 11600 | 13540 | 0.17 | 11723 | 13514 |
| G68-60 | 14633.3 | 16701 | 0.14 | 269.84 | 14757 | 16696 | 0.13 | 14784 | 16696 |
| G68-90 | 21923.2 | 25390 | 0.16 | 254.2  | 22033 | 24970 | 0.13 | 22105 | 24970 |
| G69-60 | 4453    | 5863  | 0.32 | 265.06 | 4951  | 6102  | 0.23 | 5005  | 5948  |
| G69-90 | 6682.9  | 8907  | 0.33 | 286.74 | 7332  | 9165  | 0.25 | 7386  | 9165  |
| G70-60 | 7811.7  | 9674  | 0.24 | 278.81 | 8008  | 9970  | 0.25 | 8091  | 9922  |
| G70-90 | 11738.9 | 15158 | 0.29 | 285.56 | 11968 | 14970 | 0.25 | 12109 | 14841 |
| G71-60 | 3941.9  | 5325  | 0.35 | 283.49 | 4084  | 5750  | 0.41 | 4105  | 5750  |
| G71-90 | 5923.2  | 8268  | 0.4  | 284.12 | 6055  | 8863  | 0.46 | 6191  | 8627  |
| G72-60 | 2107.7  | 3325  | 0.58 | 272.93 | 2208  | 3737  | 0.69 | 2376  | 3500  |
| G72-90 | 3183.4  | 5161  | 0.62 | 283.59 | 3248  | 5580  | 0.72 | 3296  | 5516  |
| G73-60 | 18900.5 | 20715 | 0.1  | 286.5  | 18998 | 20636 | 0.09 | 19035 | 20636 |
| G73-90 | 28351.1 | 31207 | 0.1  | 271.96 | 28393 | 31082 | 0.09 | 28468 | 30829 |
| G74-60 | 7906.6  | 9685  | 0.22 | 284.24 | 8010  | 9735  | 0.22 | 8021  | 9648  |
| G74-90 | 11875.9 | 14843 | 0.25 | 285.09 | 11961 | 14722 | 0.23 | 11973 | 14672 |
| G75-60 | 19974.5 | 21616 | 0.08 | 281.03 | 20000 | 21557 | 0.08 | 20032 | 21496 |
| G75-90 | 29959.9 | 32737 | 0.09 | 275.89 | 29995 | 32490 | 0.08 | 30026 | 32304 |

Table B.6 shows the detailed computational experiments on the instances of Pimentel et al. (2010).

Table B.6: Detailed results for the instances of Pimentel et al. (2010).

| <b>Instance</b> | <b>Lower Bound</b> | <b>Upper Bound</b> | <b>Gap (%)</b> | <b>CPU Time</b> |
|-----------------|--------------------|--------------------|----------------|-----------------|
| X11117A         | 8375.8             | 8375.8             | 0              | 0.13            |
| X11117B         | 8169.4             | 8169.4             | 0              | 0.43            |
| X11117C         | 9664.6             | 9664.6             | 0              | 0.17            |
| X11117D         | 8313.4             | 8313.4             | 0              | 0.15            |
| X11117E         | 8483               | 8483               | 0              | 0.14            |
| X11118A         | 8387               | 8387               | 0              | 0.14            |
| X11118B         | 8546.7             | 8546.7             | 0              | 0.15            |
| X11118C         | 6157               | 6157               | 0              | 0.15            |
| X11118D         | 9673               | 9673               | 0              | 0.19            |
| X11118E         | 10343.1            | 10343.1            | 0              | 218.55          |
| X11119A         | 9223.6             | 9245.2             | 0.23           | 1003.98         |
| X11119B         | 12452.8            | 12559.7            | 0.85           | 1018.98         |
| X11119C         | 12060.5            | 12121.7            | 0.5            | 1025.68         |
| X11119D         | 8831.7             | 8923.9             | 1.03           | 1016.27         |
| X11119E         | 9088               | 9171.8             | 0.91           | 1005.5          |
| X11127A         | 8215               | 8215               | 0              | 0.14            |
| X11127B         | 8910.2             | 8910.2             | 0              | 0.17            |
| X11127C         | 9197               | 9197               | 0              | 0.15            |
| X11127D         | 8997.6             | 8997.6             | 0              | 0.47            |
| X11127E         | 9983.8             | 9983.8             | 0              | 45.78           |
| X11128A         | 8198.8             | 8198.8             | 0              | 0.31            |
| X11128B         | 9600.2             | 9600.2             | 0              | 206.97          |
| X11128C         | 9802.8             | 9802.8             | 0              | 324.62          |
| X11128D         | 8963.8             | 8963.8             | 0              | 0.16            |
| X11128E         | 10869.9            | 10869.9            | 0              | 175.75          |
| X11129A         | 11540              | 11541.4            | 0.01           | 1002.13         |
| X11129B         | 7680.8             | 7712.2             | 0.41           | 1000.39         |
| X11129C         | 9454.2             | 9463.6             | 0.1            | 1002.92         |

---

|         |         |         |      |         |
|---------|---------|---------|------|---------|
| X11129D | 9622.3  | 9695    | 0.75 | 1005.58 |
| X11129E | 9929.4  | 10091.5 | 1.61 | 1013.56 |
| X11217A | 28425.1 | 28425.1 | 0    | 835.32  |
| X11217B | 26367   | 26376.9 | 0.04 | 1000.1  |
| X11217C | 27207.8 | 27207.8 | 0    | 73.71   |
| X11217D | 25637.8 | 25637.8 | 0    | 87.19   |
| X11217E | 28756.2 | 28822.4 | 0.23 | 1000.42 |
| X11218A | 25452.8 | 25455.4 | 0.01 | 1002.73 |
| X11218B | 25039.5 | 25099.9 | 0.24 | 1000.05 |
| X11218C | 23618   | 23618   | 0    | 489.91  |
| X11218D | 24299.5 | 24299.5 | 0    | 101.06  |
| X11218E | 23622.9 | 23686.3 | 0.27 | 1000.69 |
| X11219A | 24325.6 | 24567.5 | 0.98 | 1059.23 |
| X11219B | 28079.1 | 28429.4 | 1.23 | 1070.33 |
| X11219C | 27995.7 | 28446.5 | 1.58 | 1064.04 |
| X11219D | 24756.1 | 25265.8 | 2.02 | 1062.18 |
| X11219E | 28066.4 | 28490.8 | 1.49 | 1045.23 |
| X11227A | 28878.7 | 29085.8 | 0.71 | 1000.41 |
| X11227B | 28493.2 | 28493.2 | 0    | 736.48  |
| X11227C | 28814.3 | 28814.3 | 0    | 421.04  |
| X11227D | 25949.1 | 25949.1 | 0    | 73.17   |
| X11227E | 29752.8 | 29752.8 | 0    | 282.7   |
| X11228A | 25720.6 | 25721.1 | 0    | 1000.04 |
| X11228B | 32014.6 | 32093.8 | 0.25 | 1000.4  |
| X11228C | 23442.6 | 23491.9 | 0.21 | 1000.52 |
| X11228D | 27115.8 | 27140.1 | 0.09 | 1000.15 |
| X11228E | 29494.3 | 29554.2 | 0.2  | 1000.66 |
| X11229A | 25350   | 25659.2 | 1.2  | 1060.38 |
| X11229B | 29560.4 | 30449.7 | 2.92 | 1055.7  |
| X11229C | 25639.8 | 26085.4 | 1.71 | 1051.08 |
| X11229D | 27042.9 | 27852.5 | 2.91 | 1059.88 |

---

|         |         |         |      |         |
|---------|---------|---------|------|---------|
| X11229E | 26078.1 | 26620.5 | 2.04 | 1076.68 |
| X11417A | 64922.4 | 66563.1 | 2.46 | 1000.32 |
| X11417B | 55987.9 | 57770.1 | 3.08 | 1003.36 |
| X11417C | 61192.8 | 62783.3 | 2.53 | 1001.17 |
| X11417D | 62652.8 | 64422.8 | 2.75 | 1001.13 |
| X11417E | 62431.4 | 64460.2 | 3.15 | 1000.23 |
| X11418A | 70259.5 | 72916.8 | 3.64 | 1054.37 |
| X11418B | 60455   | 62130   | 2.7  | 1006.58 |
| X11418C | 61067.1 | 63041.6 | 3.13 | 1032.09 |
| X11418D | 63829.9 | 65033.9 | 1.85 | 1010.43 |
| X11418E | 69622.8 | 72626.8 | 4.14 | 1027.13 |
| X11419A | 58954.2 | 61558.4 | 4.23 | 1064.2  |
| X11419B | 52350.9 | 55310.3 | 5.35 | 1090.65 |
| X11419C | 64112.9 | 67496.3 | 5.01 | 1073.46 |
| X11419D | 65629.6 | 71691   | 8.45 | 1072.33 |
| X11419E | 73218.4 | 79729.4 | 8.17 | 1064.59 |
| X11427A | 68871.3 | 70773.6 | 2.69 | 1001.45 |
| X11427B | 59205.7 | 60784.8 | 2.6  | 1001.13 |
| X11427C | 67222   | 69321.3 | 3.03 | 1000.54 |
| X11427D | 63566.5 | 65296.6 | 2.65 | 1000.71 |
| X11427E | 59828.4 | 62003.6 | 3.51 | 1002.31 |
| X11428A | 58157.9 | 59804.2 | 2.75 | 1009.58 |
| X11428B | 64953   | 66633.3 | 2.52 | 1022.89 |
| X11428C | 54010   | 55600   | 2.86 | 1041.32 |
| X11428D | 67196.1 | 69720.2 | 3.62 | 1062.69 |
| X11428E | 62038.9 | 63616.1 | 2.48 | 1031.49 |
| X11429A | 56564.1 | 60269.2 | 6.15 | 1068.77 |
| X11429B | 60360.3 | 64618.3 | 6.59 | 1066.57 |
| X11429C | 56590.7 | 60652.8 | 6.7  | 1067.54 |
| X11429D | 61483.2 | 66313.5 | 7.28 | 1076.74 |
| X11429E | 58469.4 | 62031.5 | 5.74 | 1056.99 |

|         |         |         |      |         |
|---------|---------|---------|------|---------|
| X12117A | 7447.8  | 7447.8  | 0    | 3.7     |
| X12117B | 8432.7  | 8432.7  | 0    | 82.4    |
| X12117C | 7801.6  | 7801.6  | 0    | 18.51   |
| X12117D | 7457.8  | 7457.8  | 0    | 3.52    |
| X12117E | 7395.3  | 7395.3  | 0    | 9.38    |
| X12118A | 9293.4  | 9293.4  | 0    | 214.15  |
| X12118B | 8778.2  | 8778.2  | 0    | 100.21  |
| X12118C | 6377.7  | 6377.7  | 0    | 252.45  |
| X12118D | 8482.6  | 8482.6  | 0    | 119.9   |
| X12118E | 8330.5  | 8330.5  | 0    | 473.31  |
| X12119A | 12788.1 | 12874.9 | 0.67 | 1004.74 |
| X12119B | 15954.6 | 16195.2 | 1.49 | 1002.13 |
| X12119C | 11748.7 | 11870   | 1.02 | 1003.73 |
| X12119D | 10535.9 | 10629.6 | 0.88 | 1000.18 |
| X12119E | 9531.6  | 9691.9  | 1.65 | 1000.66 |
| X12127A | 7093.9  | 7093.9  | 0    | 6.2     |
| X12127B | 8605.7  | 8605.7  | 0    | 2.25    |
| X12127C | 8411.5  | 8411.5  | 0    | 1.46    |
| X12127D | 7149.5  | 7149.5  | 0    | 5.97    |
| X12127E | 8888.4  | 8888.4  | 0    | 49.16   |
| X12128A | 8385    | 8385    | 0    | 334.97  |
| X12128B | 7175    | 7175    | 0    | 360     |
| X12128C | 8482.5  | 8482.5  | 0    | 24.95   |
| X12128D | 8086    | 8095.5  | 0.12 | 1000.12 |
| X12128E | 6911.8  | 6911.8  | 0    | 236.28  |
| X12129A | 8766.3  | 8766.3  | 0    | 391.25  |
| X12129B | 8641.4  | 8641.4  | 0    | 392.82  |
| X12129C | 8839.1  | 8857.2  | 0.2  | 1002.21 |
| X12129D | 7912.4  | 7912.4  | 0    | 434.78  |
| X12129E | 7979    | 7979    | 0    | 392.63  |
| X12217A | 24582.4 | 24875.4 | 1.18 | 1000.72 |

|         |         |         |      |         |
|---------|---------|---------|------|---------|
| X12217B | 23114   | 23114   | 0    | 432.48  |
| X12217C | 26824.3 | 26824.3 | 0    | 611.63  |
| X12217D | 26650.4 | 26650.4 | 0    | 798.14  |
| X12217E | 21098.8 | 21098.8 | 0    | 139.76  |
| X12218A | 25839.4 | 25840.4 | 0    | 1000.34 |
| X12218B | 22494.6 | 22550.6 | 0.25 | 1000.14 |
| X12218C | 23090.8 | 23128.4 | 0.16 | 1001.88 |
| X12218D | 24956.7 | 25008.3 | 0.21 | 1001.36 |
| X12218E | 23294.8 | 23449.6 | 0.66 | 1004.09 |
| X12219A | 30102.8 | 30527.6 | 1.39 | 1006.75 |
| X12219B | 25029.9 | 25179.7 | 0.59 | 1000.75 |
| X12219C | 27043.7 | 27583.6 | 1.96 | 1002.1  |
| X12219D | 24594.8 | 24694   | 0.4  | 1002.63 |
| X12219E | 23433.4 | 23608.9 | 0.74 | 1000.27 |
| X12227A | 22489.6 | 22489.6 | 0    | 205.86  |
| X12227B | 27549.8 | 27673.6 | 0.45 | 1000.46 |
| X12227C | 24946.9 | 24946.9 | 0    | 196.15  |
| X12227D | 25998   | 26001.2 | 0.01 | 1000.04 |
| X12227E | 23084.1 | 23084.1 | 0    | 246.19  |
| X12228A | 24945.1 | 24986   | 0.16 | 1001.01 |
| X12228B | 23045.9 | 23128.5 | 0.36 | 1000.18 |
| X12228C | 25570.4 | 25689.5 | 0.46 | 1000.01 |
| X12228D | 22796.3 | 22796.5 | 0    | 1000.06 |
| X12228E | 27384.5 | 27384.5 | 0    | 187.68  |
| X12229A | 20563.3 | 20648.3 | 0.41 | 1000.19 |
| X12229B | 26735.8 | 27330.3 | 2.18 | 1001.79 |
| X12229C | 27099.4 | 27746.2 | 2.33 | 1001.95 |
| X12229D | 24084.8 | 24609.4 | 2.13 | 1017.8  |
| X12229E | 24015.7 | 24208.7 | 0.8  | 1002.95 |
| X12417A | 64836.8 | 66490.6 | 2.49 | 1012.01 |
| X12417B | 61569.9 | 63206.8 | 2.59 | 1002.73 |

|         |         |         |      |         |
|---------|---------|---------|------|---------|
| X12417C | 55971.6 | 57168.6 | 2.09 | 1005.14 |
| X12417D | 56569   | 58020   | 2.5  | 1001.71 |
| X12417E | 62964.2 | 64291.8 | 2.06 | 1000.59 |
| X12418A | 51402.1 | 52759.8 | 2.57 | 1000.45 |
| X12418B | 58445.2 | 59638   | 2    | 1004.88 |
| X12418C | 56970   | 58682.3 | 2.92 | 1000.9  |
| X12418D | 51025   | 51893.4 | 1.67 | 1010.26 |
| X12418E | 48540.1 | 48652.7 | 0.23 | 1002.86 |
| X12419A | 57959.5 | 59809   | 3.09 | 1037.72 |
| X12419B | 71467.6 | 74618.2 | 4.22 | 1027.22 |
| X12419C | 63076.2 | 66050.3 | 4.5  | 1013.74 |
| X12419D | 59229.4 | 61293.9 | 3.37 | 1023.94 |
| X12419E | 62933.8 | 65192.2 | 3.46 | 1019.64 |
| X12427A | 57350.4 | 59274.1 | 3.25 | 1000.38 |
| X12427B | 66423.8 | 68581   | 3.15 | 1000.78 |
| X12427C | 55777.6 | 57368.7 | 2.77 | 1001.15 |
| X12427D | 54029.2 | 55405.1 | 2.48 | 1000.86 |
| X12427E | 56343.9 | 57686.2 | 2.33 | 1000.59 |
| X12428A | 59031   | 60432   | 2.32 | 1004.8  |
| X12428B | 64998.2 | 68898.1 | 5.66 | 1002.77 |
| X12428C | 63894   | 65449.4 | 2.38 | 1023.58 |
| X12428D | 65649.6 | 67555.8 | 2.82 | 1000.41 |
| X12428E | 57306.8 | 58772.2 | 2.49 | 1002.44 |
| X12429A | 56712.8 | 58509.7 | 3.07 | 1006.91 |
| X12429B | 56130.2 | 58056.1 | 3.32 | 1005.1  |
| X12429C | 60838.2 | 63945.6 | 4.86 | 1000.53 |
| X12429D | 58108.6 | 61007.2 | 4.75 | 1016.32 |
| X12429E | 55051.2 | 58556   | 5.99 | 1038.64 |

Finally, tables B.7 and B.8 show the detailed computational examples for the CPLEX solver (v. 12.6) and the branch-and-price algorithm respectively.

Table B.7: CPLEX 12.6 results. Time limit is 3,600 seconds.

| Instance | Root LB    | Root UB | Root Gap | Root Time | Final LB | Final UB | Final Gap | Nodes   |
|----------|------------|---------|----------|-----------|----------|----------|-----------|---------|
| two1     | 18633.33   | 24564   | 24%      | 0.4       | 21624.3  | 22207    | 2.6%      | 5680355 |
| two2     | 22113.55   | 35799   | 38%      | 0.38      | 29394.9  | 30498    | 3.6%      | 5556579 |
| two3     | 10735.91   | 17917   | 40%      | 0.25      | 14542.8  | 15812    | 8%        | 3968000 |
| two4     | 12925.09   | 17714   | 27%      | 0.36      | 15915.8  | 15916    | 0%        | 2658228 |
| two5     | 11696.71   | 18987   | 38%      | 0.31      | 15428.8  | 16748    | 7.9%      | 2799000 |
| two6     | 13231.29   | 18541   | 29%      | 0.46      | 16008.3  | 16284    | 1.7%      | 5608178 |
| two7     | 16399.05   | 22020   | 26%      | 0.38      | 20139.3  | 20732    | 2.9%      | 6460838 |
| two8     | 12375.12   | 19411   | 36%      | 0.42      | 15614.4  | 17328    | 9.9%      | 2400000 |
| two9     | 12724.21   | 17264   | 26%      | 0.32      | 15537.8  | 15538    | 0%        | 412202  |
| two10    | 15451.31   | 19909   | 22%      | 0.43      | 18238    | 18238    | 0%        | 1232660 |
| four1    | 226337.59  | 359563  | 37%      | 1.87      | 255724   | 271933   | 6%        | 1254512 |
| four2    | 52152.34   | 106911  | 51%      | 1.78      | 57658.4  | 63242    | 8.8%      | 710952  |
| four3    | 147637     | 192941  | 23%      | 1.62      | 151717   | 161088   | 5.8%      | 1739950 |
| four4    | 305535.06  | 603906  | 49%      | 1.95      | 352436   | 372658   | 5.4%      | 358984  |
| four5    | 28054.87   | 46143   | 39%      | 1.27      | 34497.3  | 36791    | 6.2%      | 1329919 |
| four6    | 26915.78   | 41197   | 35%      | 0.86      | 31583    | 32939    | 4.1%      | 2167716 |
| four7    | 29623.81   | 54497   | 46%      | 1.14      | 33166.5  | 34819    | 4.7%      | 2528026 |
| four8    | 658374.06  | 903088  | 27%      | 1.94      | 705027   | 773142   | 8.8%      | 305351  |
| four9    | 236989.19  | 475603  | 50%      | 1.85      | 266619   | 323667   | 17.6%     | 266766  |
| four10   | 1076229.25 | 1667283 | 35%      | 1.31      | 1109650  | 1222330  | 9.2%      | 879502  |
| six1     | 2816410.53 | 3626814 | 22%      | 2.38      | 2835770  | 3064800  | 7.5%      | 586773  |
| six2     | 372790.22  | 494187  | 25%      | 2.72      | 393148   | 425691   | 7.6%      | 202984  |
| six3     | 2437346.33 | 3256795 | 25%      | 2.56      | 2462160  | 2672120  | 7.9%      | 312844  |
| six4     | 2506337.74 | 3416842 | 27%      | 2.62      | 2525860  | 2771130  | 8.9%      | 380556  |
| six5     | 1236985.78 | 2085302 | 41%      | 4.77      | 1259680  | 1525190  | 17.4%     | 263743  |
| six6     | 498695.22  | 1018194 | 51%      | 5.05      | 513588   | 686779   | 25.2%     | 139165  |
| six7     | 607607.56  | 831457  | 27%      | 3.22      | 633047   | 684931   | 7.6%      | 174541  |
| six8     | 2450355.51 | 3246451 | 25%      | 2.71      | 2468450  | 2653440  | 7%        | 305564  |

|         |            |         |     |       |         |         |       |         |
|---------|------------|---------|-----|-------|---------|---------|-------|---------|
| six9    | 362751.97  | 637885  | 43% | 3.35  | 383083  | 414820  | 7.7%  | 147986  |
| six10   | 1290722.5  | 2081707 | 38% | 4.28  | 1318060 | 1582930 | 16.7% | 261820  |
| eight1  | 703513.9   | 1660128 | 58% | 6.82  | 712655  | 853548  | 16.5% | 88091   |
| eight2  | 461527.71  | 602037  | 23% | 3     | 479288  | 511634  | 6.3%  | 285003  |
| eight3  | 2064834.29 | 3828783 | 46% | 10.23 | 2112650 | 2678720 | 21.1% | 56133   |
| eight4  | 1601580.18 | 2411096 | 34% | 9.02  | 1620270 | 1925580 | 15.9% | 86660   |
| eight5  | 4863764.71 | 6042921 | 20% | 4.51  | 4891690 | 5191490 | 5.8%  | 270246  |
| eight6  | 1943548.76 | 3113762 | 38% | 9.14  | 1967400 | 2368320 | 16.9% | 127228  |
| eight7  | 558241.16  | 668598  | 17% | 3.77  | 574597  | 623029  | 7.8%  | 262609  |
| eight8  | 466534.18  | 733807  | 36% | 3.44  | 482007  | 519776  | 7.3%  | 203344  |
| eight9  | 1306898.21 | 1824472 | 28% | 7.04  | 1327170 | 1471790 | 9.8%  | 64604   |
| eight10 | 479997.38  | 595254  | 19% | 4.3   | 491490  | 530515  | 7.4%  | 135280  |
| ten1    | 78249.37   | 99006   | 21% | 2.88  | 78558.3 | 86213   | 8.9%  | 707002  |
| ten2    | 60523.25   | 75998   | 20% | 2.25  | 60908.5 | 66659   | 8.6%  | 1123409 |
| ten3    | 95026.45   | 134235  | 29% | 3.74  | 95502.4 | 106254  | 10.1% | 530108  |
| ten4    | 75516.57   | 99424   | 24% | 2.65  | 76061   | 81790   | 7%    | 902207  |
| ten5    | 87489.11   | 114092  | 23% | 3.88  | 87849   | 97593   | 10%   | 578299  |
| ten6    | 710059.56  | 934138  | 24% | 4.68  | 720815  | 785949  | 8.3%  | 178673  |
| ten7    | 107317.91  | 157870  | 32% | 3.61  | 107726  | 120889  | 10.9% | 545776  |
| ten8    | 96755.9    | 137071  | 29% | 3.44  | 97196.7 | 107905  | 9.9%  | 586079  |
| ten9    | 118492.47  | 158508  | 25% | 4.43  | 118775  | 132503  | 10.4% | 477277  |
| ten10   | 104335.56  | 138726  | 25% | 3.61  | 104785  | 116795  | 10.3% | 526474  |

Table B.8: Horizon Decomposition results. Time limit is 3,600 seconds.

| Instance | Root LB  | Root UB | Root Gap | Root Time | Final LB | Final UB | Final Gap | Nodes |
|----------|----------|---------|----------|-----------|----------|----------|-----------|-------|
| two1     | 21764.79 | 22344   | 3%       | 81.43     | 21881.6  | 22283    | 2%        | 161   |
| two2     | 29702.7  | 31305   | 5%       | 76.25     | 29909.24 | 30656    | 2%        | 143   |
| two3     | 15812.12 | 15812   | 0%       | 93.83     | 15812.12 | 15812    | 0%        | 0     |
| two4     | 15914.69 | 15916   | 0%       | 72.1      | 15914.69 | 15916    | 0%        | 0     |
| two5     | 16489.43 | 16622   | 1%       | 104.9     | 16621.98 | 16622    | 0%        | 72    |

|        |           |         |     |          |           |         |     |     |
|--------|-----------|---------|-----|----------|-----------|---------|-----|-----|
| two6   | 16272.71  | 16284   | 0%  | 93.15    | 16283.66  | 16284   | 0%  | 10  |
| two7   | 20724.63  | 20732   | 0%  | 79.91    | 20730.39  | 20732   | 0%  | 12  |
| two8   | 17197.16  | 17436   | 1%  | 81.5     | 17321.79  | 17335   | 0%  | 123 |
| two9   | 15451.65  | 15595   | 1%  | 79.94    | 15536.87  | 15538   | 0%  | 18  |
| two10  | 18236.81  | 18238   | 0%  | 99.45    | 18236.81  | 18238   | 0%  | 0   |
| four1  | 266020.63 | 270842  | 2%  | 3127.87  | 266020.63 | 270842  | 2%  | 0   |
| four2  | 60580.93  | 63171   | 4%  | 1591.01  | 60611.05  | 63171   | 4%  | 4   |
| four3  | 156705.47 | 161558  | 3%  | 2439.92  | 156705.47 | 161558  | 3%  | 0   |
| four4  | 357206.98 | 370732  | 4%  | 3618.84  | 357206.98 | 370732  | 4%  | 0   |
| four5  | 35761.64  | 37065   | 4%  | 811.34   | 35781.79  | 37065   | 3%  | 18  |
| four6  | 32149.83  | 33569   | 4%  | 475.47   | 32153.91  | 33520   | 4%  | 10  |
| four7  | 34488.28  | 34701   | 1%  | 1298.8   | 34502.22  | 34693   | 1%  | 10  |
| four8  | 741254.15 | 774861  | 4%  | 3658     | 741254.15 | 774861  | 4%  | 0   |
| four9  | 264326.64 | 299098  | 12% | 3602.52  | 264326.64 | 299098  | 12% | 0   |
| four10 | 1134210.4 | 1252197 | 9%  | 3613.49  | 1134210.4 | 1252197 | 9%  | 0   |
| six1   | 2831460.4 | 3045120 | 7%  | 3605.23  | 2831460.4 | 3045120 | 7%  | 0   |
| six2   | 397588.67 | 441550  | 10% | 988.17   | 397787.18 | 441550  | 10% | 6   |
| six3   | 2461738.2 | 2718412 | 9%  | 3600     | 2461738.2 | 2718412 | 9%  | 0   |
| six4   | 2524337.5 | 2753073 | 8%  | 554.019  | 2524337.5 | 2753073 | 8%  | 2   |
| six5   | 1256730.9 | 1490512 | 16% | 1571.84  | 1256730.9 | 1490512 | 16% | 0   |
| six6   | 529813.33 | 680110  | 22% | 2337.255 | 529813.33 | 680110  | 22% | 0   |
| six7   | 643056.48 | 686690  | 6%  | 791.45   | 645635.09 | 686690  | 6%  | 8   |
| six8   | 2464999.1 | 2681183 | 8%  | 1011.202 | 2465000.2 | 2681183 | 8%  | 1   |
| six9   | 384777.88 | 410867  | 6%  | 906.42   | 388321.84 | 410867  | 5%  | 6   |
| six10  | 1286695   | 1577048 | 18% | 1566.86  | 1287565.3 | 1577048 | 18% | 4   |
| eight1 | 729662.59 | 870461  | 16% | 3693.55  | 729662.59 | 870461  | 16% | 0   |
| eight2 | 483109.04 | 495876  | 3%  | 2992.17  | 483109.42 | 495876  | 3%  | 1   |
| eight3 | 1994974.9 | 2630604 | 24% | 3570.92  | 1994974.9 | 2630604 | 24% | 0   |
| eight4 | 1600918   | 1933251 | 17% | 3642.26  | 1600918   | 1933251 | 17% | 0   |
| eight5 | 4798227.3 | 5275954 | 9%  | 3605.01  | 4798227.3 | 5275954 | 9%  | 0   |
| eight6 | 1934328.2 | 2349290 | 18% | 3626.95  | 1934328.2 | 2349290 | 18% | 0   |

---

|         |           |         |     |         |           |         |     |   |
|---------|-----------|---------|-----|---------|-----------|---------|-----|---|
| eight7  | 578650.29 | 598790  | 3%  | 3630.72 | 578650.29 | 598790  | 3%  | 0 |
| eight8  | 484271.58 | 517199  | 6%  | 3605.5  | 484271.58 | 517199  | 6%  | 0 |
| eight9  | 1337414.6 | 1518420 | 12% | 3619.35 | 1337414.6 | 1518420 | 12% | 0 |
| eight10 | 498039.22 | 529853  | 6%  | 3659.3  | 498039.22 | 529853  | 6%  | 0 |
| ten1    | 79629.32  | 86577   | 8%  | 3600    | 79629.32  | 86577   | 8%  | 0 |
| ten2    | 62234.72  | 65783   | 5%  | 3600    | 62234.72  | 65783   | 5%  | 0 |
| ten3    | 97766.63  | 105606  | 7%  | 3600    | 97766.63  | 105606  | 7%  | 0 |
| ten4    | 77616.11  | 82622   | 6%  | 3600    | 77616.11  | 82622   | 6%  | 0 |
| ten5    | 89598.68  | 97232   | 8%  | 3600    | 89598.68  | 97232   | 8%  | 0 |
| ten6    | 725104.07 | 772328  | 6%  | 3600    | 725104.07 | 772328  | 6%  | 0 |
| ten7    | 109038.79 | 118859  | 8%  | 3600    | 109038.79 | 118859  | 8%  | 0 |
| ten8    | 99286.56  | 108461  | 8%  | 3600    | 99286.56  | 108461  | 8%  | 0 |
| ten9    | 119992.25 | 130168  | 8%  | 3600    | 119992.25 | 130168  | 8%  | 0 |
| ten10   | 106574.53 | 114957  | 7%  | 3600    | 106574.53 | 114957  | 7%  | 0 |

## References

- Müller, L.F., S. Spoorendonk, D. Pisinger. 2012. A hybrid adaptive large neighborhood search heuristic for lot-sizing with setup times. *European Journal of Operational Research* **218** 614 – 623.
- Pimentel, C. M. O., A. Filipe Pereira, V.J.M de Carvalho. 2010. Comparing dantzig-wolfe decompositions and branch-and-price algorithms for the multi-item capacitated lotsizing problem. *Optimization Methods and Software* **25** 299–319.
- Süral, H., M. Denzel, L. N. Van Wassenhove. 2009. Lagrangean relaxation based heuristics for lot sizing with setup times. *European Journal of Operational Research* **194** 51 – 63.
